# Supplementary material
Source: PubMed Central journal article supplement (PMC4301999)

## SUPPLEMENTARY MATERIAL

### Table of contents

|                                                       |               |
|-------------------------------------------------------|---------------|
| Table S1                                              | pages S2-S8   |
| List of phage clusters<br>present in dot plot figures | page S9       |
| Legends for figures S1-S7                             | pages S10-S14 |
| Figure S1A-S1W                                        | page S15-S37  |
| Figure S2A-S2C                                        | page S38-S40  |
| Figure S3                                             | page S41      |
| Figure S4                                             | page S42      |
| Figure S5                                             | page S43      |
| Figure S6                                             | page S44      |
| Figure S7                                             | page S45      |

## Table S1

### Tailed Phages Genomes Sequences Used in this Study

Footnotes:

- \* Not proven to be temperate phages. Homologous DNA molecules are present as plasmids in bacterial genome sequences.
- # Sequence nearly complete, but clearly incomplete as reported.
- † Prophage sequence that has not been proven to be a fully functional phage.

Table S1

| CLUSTER    | Prototype | SubClusters                    | Member phages | Host                                | Accession number | Sequence publication      | Genome size (kbp) |
|------------|-----------|--------------------------------|---------------|-------------------------------------|------------------|---------------------------|-------------------|
| Lytic1     | T1-like   | A                              | T1            | <i>Escherichia coli</i>             | AY216660         | Virology 318:245          | 48836             |
|            |           | A                              | Shf1          | <i>Shigella flexneri</i>            | NC_015456        | –                         | 50661             |
|            |           | A                              | ADB-2         | <i>Escherichia coli</i>             | JX912252         | GenomeA 1:e00043-13       | 50552             |
|            |           | B                              | Rogue1        | <i>Escherichia coli</i>             | JQ182736         | ViroJ 9:207               | 45805             |
|            |           | B                              | JK06          | <i>Escherichia coli</i>             | DQ121662         | –                         | 46072             |
|            |           | B                              | øJLA23        | <i>Escherichia coli</i>             | KC333879         | GenAnn 1:e00219-12        | 43017             |
|            |           | B                              | øKP26         | <i>Escherichia coli/S. enterica</i> | KC579452         | ArchViro1 158:2395        | 47285             |
|            |           | B                              | øEB49         | <i>Escherichia coli</i>             | JF770475         | AEM 77:6630               | 47180             |
|            |           | C                              | Rtp           | <i>Escherichia coli</i>             | AM156809         | JBACT 188:1419            | 46219             |
|            |           | C                              | ACG-M12       | <i>Escherichia coli</i>             | NC_019404        | Viruses 4:471             | 46054             |
|            |           | D                              | F20#          | <i>Enterobacter aerogenes</i>       | JN672684         | JGenViro1 93:2310         | 51543             |
|            |           | D                              | KP36          | <i>Klebsiella pneumoniae</i>        | NC_019781        | ViroJ 10:100              | 49818             |
|            |           | E                              | TLS           | <i>Escherichia coli</i>             | AY308796         | JMolBiol 308:579          | 49902             |
|            |           | E                              | FSL_SP-126 #  | <i>Salmonella enterica</i>          | KC139521         | BMCgenomics 14:481        | 51092             |
|            |           | F                              | ESP2949-1     | <i>Cronobacter sakazakii</i>        | JF912400         | ArchViro1 157:199         | 49116             |
|            |           | G                              | pSf-1         | <i>Shigella flexneri</i>            | KC710998         | ResMicro 164:979          | 51821             |
|            |           | Lytic2                         | T4-like       | A                                   | T4               | <i>Escherichia coli</i>   | AY318471          |
| A          | wV7       |                                |               | <i>Escherichia coli</i>             | HM997020         | JViro1 88:1026            | 166452            |
| A          | RB14      |                                |               | <i>Escherichia coli</i>             | NC_012638        | –                         | 165429            |
| A          | RB32      |                                |               | <i>Escherichia coli</i>             | NC_008515        | –                         | 165890            |
| A          | RB51      |                                |               | <i>Escherichia coli</i>             | NC_012635        | –                         | 168394            |
| A          | ECML-134  |                                |               | <i>Escherichia coli</i>             | JX128259         | –                         | 166783            |
| A          | IME09     |                                |               | <i>Escherichia coli</i>             | JN202312         | –                         | 166499            |
| A          | ACG-C40   |                                |               | <i>Escherichia coli</i>             | JN986846         | Viruses 4:471             | 167396            |
| A          | AR1       |                                |               | <i>Escherichia coli</i>             | AP011113         | JViro1 85:6567            | 167435            |
| A          | Shf2      |                                |               | <i>Shigella flexneri</i>            | NC_015457        | –                         | 165919            |
| A          | PST       |                                |               | <i>Yersinia pestis</i>              | KF208315         | –                         | 167785            |
| A          | øD1       |                                |               | <i>Yersinia pestis</i>              | HE956711         | –                         | 167063            |
| A          | e11/2     |                                |               | <i>Escherichia coli</i>             | NC_024125        | –                         | 168470            |
| B          | RB69      |                                |               | <i>Escherichia coli</i>             | NC_004928        | ViroJ 3:30                | 167560            |
| B          | HX01      |                                |               | <i>Escherichia coli</i>             | JX536493         | JViro1 86:13871           | 161158            |
| B          | JS09      |                                |               | <i>Escherichia coli</i>             | NC_024124        | –                         | 169148            |
| C          | JS10      |                                |               | <i>Escherichia coli</i>             | EU863409         | Virology 388:21           | 171451            |
| C          | JS98      |                                |               | <i>Escherichia coli</i>             | EF469154         | JBact 189:8206            | 170523            |
| C          | Bp7       |                                |               | <i>Escherichia coli</i>             | HQ829472         | JViro1 86:13832           | 168066            |
| C          | IME08     |                                |               | <i>Escherichia coli</i>             | NC_014260        | ArchViro1 156:1489        | 172253            |
| D          | VR7       |                                |               | <i>Escherichia coli</i>             | HM563683         | ArchViro1 155:871         | 169285            |
| D          | SP18      |                                |               | <i>Shigella sonnei</i>              | GQ981382         | JMicrobiol 48:213         | 170605            |
| E          | STML_198  |                                |               | <i>Salmonella enterica</i>          | JX181825         | –                         | 158099            |
| E          | S16       |                                |               | <i>Salmonella enterica</i>          | HQ331142         | MolMicro 87:818           | 160221            |
| F          | øR1-RT    |                                |               | <i>Yersinia enterocolitica</i>      | HE956709         | –                         | 168809            |
| G          | CC31      |                                |               | <i>Escherichia coli</i>             | GU323318         | –                         | 166540            |
| G          | PG7       |                                |               | <i>Enterobacter cloacae</i>         | KJ101592         | –                         | 173276            |
| H          | RB49      |                                |               | <i>Escherichia coli</i>             | NC_005066        | ViroJ 3:30                | 164018            |
| H          | ø1        |                                |               | <i>Escherichia coli</i>             | NC_009821        | –                         | 164270            |
| H          | JSE       |                                |               | <i>Escherichia coli</i>             | EU863408         | Virology 388:21           | 166418            |
| I          | RB16      |                                |               | <i>Escherichia coli</i>             | HM134276         | –                         | 176789            |
| I          | RB43      |                                |               | <i>Escherichia coli</i>             | NC_007023        | ViroJ 3:30                | 180500            |
| I          | Lw1       |                                |               | <i>Escherichia coli</i>             | NC_021344        | GenomeA 1:e00743-13       | 176227            |
| I          | KP15      |                                |               | <i>Klebsiella pneumoniae</i>        | GU295964         | ViroJ 10:100              | 174436            |
| I          | KP27      |                                |               | <i>Klebsiella pneumoniae</i>        | HQ918180         | ViroJ 10:100              | 174413            |
| I          | GAP161    |                                |               | <i>Cronobacter sakazakii</i>        | JN882287         | JViro1 86:13806           | 178193            |
| J          | PS2       | <i>Serratia marcescens</i>     | KJ025957      | –                                   | 167266           |                           |                   |
| not Entero | 44RR2.t8  | <i>Aeromonas</i>               | AY375531      | –                                   | 173591           |                           |                   |
| not Entero | 31        | <i>Aeromonas</i>               | AY962392      | –                                   | 172963           |                           |                   |
| not Entero | 25        | <i>Aeromonas</i>               | DQ529280      | –                                   | 161475           |                           |                   |
| not Entero | IME13     | <i>Stenotrophomonas</i>        | JX306041      | –                                   | 162327           |                           |                   |
| not Entero | Acj61     | <i>Acinetobacter</i>           | GU911519      | ViroJ 7:292                         | 164093           |                           |                   |
| not Entero | Ac42      | <i>Acinetobacter</i>           | HM032710      | ViroJ 7:292                         | 167716           |                           |                   |
| Lytic3     | Vi01-like | A                              | CBA120        | <i>Escherichia coli</i>             | JN593240         | ViroJ 8:430               | 157304            |
|            |           | A                              | Phax1         | <i>Escherichia coli</i>             | JN673056         | Microbiology 159:1629     | 156628            |
|            |           | A                              | ECML-4        | <i>Escherichia coli</i>             | JX128257         | –                         | 157308            |
|            |           | A                              | SKML-39       | <i>Salmonella enterica</i>          | JX181829         | –                         | 159624            |
|            |           | A                              | øSH19         | <i>Salmonella enterica</i>          | JN126049         | ViroJ 8:498               | 157785            |
|            |           | A                              | SFP10         | <i>Salmonella enterica</i>          | HQ259103         | ApplEnvMicro 78:58        | 157950            |
|            |           | A                              | Vi01 (VII)    | <i>Salmonella enterica</i>          | FQ312032         | JBact 192:5746            | 157061            |
|            |           | A                              | Det7          | <i>Salmonella enterica</i>          | –                | Roger Hendrix, pers. com. | 157498            |
|            |           | A                              | Marshall      | <i>Salmonella enterica</i>          | KF669653         | GenomeA 1:e00867          | 156338            |
|            |           | A                              | Maynard       | <i>Salmonella enterica</i>          | KF669654         | GenomeA 1:e00867          | 154701            |
|            |           | A                              | SJ2           | <i>Salmonella enterica</i>          | KJ174317         | –                         | 152460            |
|            |           | A                              | SJ3           | <i>Salmonella enterica</i>          | KJ174318         | –                         | 162910            |
|            |           | B                              | LIMEstone1    | <i>Dickeya solani</i>               | HE600015         | PLoSOne 7:e33227          | 152472            |
|            |           | B                              | øSboM-AG3     | <i>Shigella boydii</i>              | FJ373894         | ViroJ 8:242               | 158006            |
|            |           | C                              | 0507-KN2-1    | <i>Klebsiella pneumoniae</i>        | AB797215         | –                         | 159991            |
|            |           | D                              | øMAM1         | <i>Serratia plymuthica</i>          | JX878496         | JViro1 86:13872           | 157834            |
|            |           | Lytic4                         | T5-like       | A                                   | T5               | <i>Escherichia coli</i>   | AY543070          |
| A          | EPS7      |                                |               | <i>Salmonella enterica</i>          | CP000917         | FemsMicroLett 289:202     | 111382            |
| A          | SPC35     |                                |               | <i>Salmonella/Escherichia coli</i>  | HQ406778         | ApplEnvMicro 77:2042      | 118351            |
| A          | AKFV33    |                                |               | <i>Escherichia coli</i>             | NC_017969        | PLoSOne e34585            | 108853            |
| A          | H8#       |                                |               | <i>Salmonella enterica</i>          | AC171169         | JBact 189:5658            | 104373            |
| A          | øR201     |                                |               | <i>Yersinia enterocolitica</i>      | HE956708         | –                         | 112795            |
| B          | My1       |                                |               | <i>Pectobacterium carotovorum</i>   | JX195166         | JViro1 86:11410           | 122024            |
| not entero | Vpv-1     | <i>Vibrio parahaemolyticus</i> | JQ340389      | JViro1 86:7103                      | 111506           |                           |                   |

Table S1

| CLUSTER | Prototype       | SubClusters    | Member phages    | Host                                  | Accession number           | Sequence publication              | Genome size (kbp) |
|---------|-----------------|----------------|------------------|---------------------------------------|----------------------------|-----------------------------------|-------------------|
| Lytic5  | T7-like         | A              | T7               | <i>Escherichia coli</i>               | V01146                     | JMolBiol 166: 477                 | 39936             |
|         | T7 supercluster | A              | øA1122           | <i>Yersinia pestis</i>                | AY247822                   | JBact 185:5248                    | 37555             |
|         |                 | A              | YpsP-G           | <i>Yersinia pestis</i>                | JQ965703                   | Bacteriophage 2:168               | 38288             |
|         |                 | A              | YpP-R            | <i>Yersinia pestis</i>                | JQ965701                   | Bacteriophage 2:168               | 38284             |
|         |                 | A              | YpP-Y            | <i>Yersinia pestis</i>                | JQ965700                   | Bacteriophage 2:168               | 37714             |
|         |                 | A              | R                | <i>Yersinia pestis</i>                | JX000007                   | –                                 | 37260             |
|         |                 | A              | Y                | <i>Yersinia pestis</i>                | JQ957925                   | –                                 | 37432             |
|         |                 | A              | 13a              | <i>Escherichia coli</i>               | EU734174                   | –                                 | 38841             |
|         |                 | A              | Vi VI (VI06)     | <i>Salmonella enterica</i>            | FR667955                   | JBact 192:5746                    | 38368             |
|         |                 | A              | Vi VII (VI07)    | <i>Salmonella enterica</i>            | Derek Pickard, pers. comm. | JBact 192:5746                    | 39248             |
|         |                 | A              | Vi V (Vi05)      | <i>Salmonella enterica</i>            | Derek Pickard, pers. comm. | JBact 192:5746                    | 38582             |
|         |                 | A (not entero) | IME15            | <i>Stenotrophomonas maltophilia</i>   | JX872508                   | JVirol 86:13839                   | 38,513            |
|         |                 | B              | T3               | <i>Escherichia coli</i>               | AJ318471                   | JMolBiol 319:1115                 | 38208             |
|         |                 | B              | øYeO3-12         | <i>Yersinia enterocolitica</i>        | AJ251805                   | JBact 183:1928                    | 39600             |
|         |                 | B              | øSG-JL2          | <i>Salmonella enterica</i>            | EU547803                   | ApplEnvMicro 74:6970              | 38815             |
|         |                 |                |                  |                                       |                            | JGenVirol 62(Pt 2):331; Gene98:89 |                   |
|         |                 | C              | BA14             | <i>Escherichia coli</i>               | NC_011040                  | –                                 | 39816             |
|         |                 | C              | YpP-G            | <i>Yersinia pestis</i>                | JQ965702                   | –                                 | 39415             |
|         |                 | C              | Berlin           | <i>Yersinia pestis</i>                | NC_008694                  | –                                 | 37555             |
|         |                 | C              | 285p             | <i>Escherichia coli</i>               | GQ468526                   | VirusGenes 48:528                 | 39270             |
|         |                 | C              | Yepe2            | <i>Yersinia pestis</i>                | NC_011038                  | JGenVirol 92(Pt 1):216            | 38677             |
|         |                 | C              | Yep-ø            | <i>Yersinia pestis</i>                | HQ333270                   | JGenVirol 92(Pt 1):216            | 38616             |
|         |                 | C              | Kvp1             | <i>Kluyvera cryocrescens</i>          | FJ194439                   | VirolJ 5:122                      | 39472             |
|         |                 | C              | FE44             | <i>Erwinia</i>                        | NC_022744                  | –                                 | 39860             |
|         |                 | D              | K30              | <i>Escherichia coli</i>               | HM480846                   | –                                 | 40940             |
|         |                 | D              | KP32             | <i>Klebsiella pneumoniae</i>          | GQ413937                   | VirolJ 10:100                     | 41119             |
|         |                 | D              | K11              | <i>Klebsiella sp. 390</i>             | EU734173                   | G3 2:825                          | 41181             |
|         |                 | E              | L1               | <i>Erwinia amylovora</i>              | HQ728265                   | ApplEnvMicro 77:5945              | 39282             |
|         |                 | F              | Mmp1             | <i>Morganella morganii</i>            | EU652770                   | Genomics 96:167                   | 38233             |
|         |                 | G              | CR8              | <i>Citrobacter rodentium</i>          | HG818824                   | –                                 | 39651             |
|         |                 | H              | CR44b            | <i>Citrobacter rodentium</i>          | HG818822                   | –                                 | 39207             |
|         |                 | H              | EcoDS1           | <i>Escherichia coli</i>               | NC_011042                  | –                                 | 39252             |
|         |                 | H              | Dev2             | <i>Cronobacter turicensis</i>         | HG813241                   | –                                 | 38966             |
|         |                 | H              | K1F              | <i>Escherichia coli</i>               | AM084414                   | JBact 187:8499                    | 39699             |
|         |                 | H              | Vi III (VI03)    | <i>Salmonella enterica</i>            | Derek Pickard, pers. comm. | JBact 192:5746                    | 38969             |
|         |                 | not entero     | ICP3_2009_B      | <i>Vibrio cholerae</i>                | HQ641341                   | –                                 | 39,042            |
|         |                 | not entero     | VP3              | <i>Vibrio cholerae</i>                | JQ780163                   | –                                 | 38,927            |
|         |                 | not entero     | N4               | <i>Vibrio cholerae</i>                | JQ780163                   | –                                 | 38,983            |
|         |                 | not entero     | ICP3_2009_A      | <i>Vibrio cholerae</i>                | HQ641342                   | –                                 | 39,503            |
|         |                 | not entero     | ICP3             | <i>Vibrio cholerae</i>                | NC_015159                  | –                                 | 40973             |
|         |                 | not entero     | VP4              | <i>Vibriophage</i>                    | NC_007149                  | –                                 | 41386             |
|         |                 | not entero     | øBB-PF7A         | <i>Pseudomonas fluorescens</i>        | NC_015264                  | BMCBiotechnol 8:80                | 39562             |
|         |                 | not entero     | PPpW-4           | <i>Pseudomonas plecoglossicida</i>    | NC_023005                  | –                                 | 40192             |
|         |                 | not entero     | ø15              | <i>Pseudomonas putida</i>             | NC_015208                  | PLoS One 6:e18597                 | 37359             |
|         |                 | not entero     | ø-S1             | <i>Pseudomonas fluorescens</i>        | NC_021062                  | JVirol 86:10239                   | 40441             |
|         |                 | not entero     | gh-1             | <i>Pseudomonas putida</i>             | NC_004665                  | Virology311:305                   | 43444             |
|         |                 | not entero     | RSB2             | <i>Ralstonia solanacearum</i>         | NC_023736                  | –                                 | 43769             |
|         |                 | not entero     | RHEph01          | <i>Rhizobium etli</i>                 | JX483873                   | ApplEnvMicro 80:446               | 44371             |
| Lytic6  | SP6-like        | A              | SP6              | <i>Salmonella enterica</i>            | AY288927                   | JBact 186:1933                    | 43769             |
|         | T7 supercluster | A              | ACG-C91          | <i>Escherichia coli</i>               | NC_019403                  | Viruses 4:471                     | 44385             |
|         |                 | A              | K1-5 (K1-dep(3)) | <i>Escherichia coli</i>               | AY370674                   | JMolBiol 335:1151                 | 45251             |
|         |                 | A              | K1E (K1-dep(2))  | <i>Escherichia coli</i>               | AM084415                   | MolMicro 60:1123                  | 43931             |
|         |                 | A              | UAB-ø78          | <i>Salmonella enterica</i>            | GU595417                   | IntJFoodMicrobiol 165:169         | 44618             |
|         |                 |                |                  |                                       |                            | Derek Pickard, pers. comm.        |                   |
|         |                 | B              | Vi IV (Vi04)     | <i>Salmonella enterica</i>            |                            | JBact 192:5746                    | 44400             |
|         |                 | C              | PP1              | <i>Pectobacterium carotovorum</i>     | JQ837901                   | JVirol 86:8899                    | 45445             |
|         |                 | D              | ERA103           | <i>Erwinia amylovora</i>              | EF160123                   | ApplEnvMicro 51:862               | 45554             |
|         |                 | D              | øEa100           | <i>Erwinia amylovora</i>              | FQ482086                   | JBact 193:795                     | 45522             |
|         |                 | D              | øEa1h            | <i>Erwinia amylovora</i>              | FQ482084                   | JBact 193:795                     | 44541             |
|         |                 | not entero     | Vc1              | <i>Vibrio sp.</i>                     | KJ502657                   | –                                 | 43809             |
| Lytic7  | KP34-like       | A              | KP34             | <i>Klebsiella pneumoniae</i>          | NC_013649                  | AppMicroBiotech 90:1333           | 43766             |
|         | T7 supercluster | A              | F19              | <i>Klebsiella pneumoniae</i>          | KF765493                   | –                                 | 44546             |
|         |                 | B              | LIMElight        | <i>Pantoea agglomerans</i>            | FR687252                   | ApplEnvMicro 77:3443              | 43931             |
|         |                 | not entero     | VP93             | <i>Vibrio parahApp/EnvMicroolytic</i> | NC_012662                  | –                                 |                   |
| Lytic8  | LIMEzero        | A              | LIMEzero         | <i>Pantoea agglomerans</i>            | FR751545                   | ApplEnvMicro 77:3443              | 43032             |
| Lytic9  | T7 supercluster | A              | øKT-like         | <i>Escherichia coli</i>               | JN882298                   | –                                 | 42608             |
| Lytic10 | GAP227-like     | A              | GAP227           | <i>Coronobacter sakazakii</i>         | NC_020078                  | GenomeA 1:e00122-12               | 41796             |
|         | T7 supercluster | B              | øR8-01           | <i>Yersinia enterocolitica</i>        | HE956707                   | –                                 | 42081             |
|         |                 | C              | ø80-18           | <i>Yersinia enterocolitica</i>        | HE956710                   | –                                 | 41572             |
|         |                 | not entero     | øAS7             | <i>Aeromonas salmonicida</i>          | NC_019528                  | –                                 |                   |

Table S1

| CLUSTER    | Prototype         | SubClusters                  | Member phages                       | Host                                | Accession number | Sequence publication                    | Genome size (kbp) |
|------------|-------------------|------------------------------|-------------------------------------|-------------------------------------|------------------|-----------------------------------------|-------------------|
| not Entero | T7 Supercluster   | not entero                   | Cd1                                 | <i>Caulobacter crescentus</i>       | GU393987         | –                                       | 41581             |
|            |                   | not entero                   | JG068                               | <i>Burkholderia cenocepacia</i> K56 | NC_022916        | –                                       | 41604             |
|            |                   | not entero                   | Paz                                 | <i>Xyella fastidiosa</i>            | NC_022982        | –                                       | 43869             |
|            |                   | not entero                   | Prado                               | <i>Xyella fastidiosa</i>            | NC_022987        | –                                       | 43940             |
|            |                   | not entero                   | Bf7                                 | <i>Pseudomonas tolaasii</i> LMG 23  | NC_016764        | –                                       | 40058             |
|            |                   | not entero                   | RSB1                                | <i>Ralstonia</i>                    | NC_011201        | –                                       | 43079             |
|            |                   | not entero                   | RHEph02                             | <i>Rhizobium etli</i>               | JX483874         | ApplEnvMicro 80:446                     | 46486             |
|            |                   | not entero                   | RHEph08                             | <i>Rhizobium etli</i>               | JX483879         | ApplEnvMicro 80:446                     | 43619             |
|            |                   | not entero                   | øAB1                                | <i>Acinetobacter baumannii</i>      | HQ186308         | Genomics91:249                          | 41526             |
|            |                   | not entero                   | Abp1                                | <i>Acinetobacter baumannii</i>      | NC_021316        | CurrMicrobiol 66:535                    | 42185             |
|            |                   | not entero                   | AB3                                 | <i>Acinetobacter baumannii</i>      | NC_021337        | –                                       | 31185             |
|            |                   | not entero                   | phi-2                               | <i>Pseudomonas fluorescens</i>      | NC_013638        | –                                       | 43114             |
|            |                   | not entero                   | RSB3                                | <i>Ralstonia solanacearum</i>       | NC_022917        | –                                       | 44578             |
|            |                   | not entero                   | øKMV                                | <i>Pseudomonas aeruginosa</i>       | EU236438.1       | Virology 312:49                         | 42519             |
|            |                   | not entero                   | LKA1                                | <i>Pseudomonas aeruginosa</i>       | AM265639.1       | JBact 188:6924                          | 41593             |
|            |                   | Lytic11                      | N4-like                             | A                                   | N4               | <i>Escherichia coli</i>                 | EF056009          |
| A          | EC1-UPM           |                              |                                     | <i>Escherichia coli</i>             | KC206278         | ViroJ 10:308                            | 70831             |
| A          | IME11             |                              |                                     | <i>Escherichia coli</i>             | NC_019423        | JViro 86:13861                          | 77570             |
| A          | G7C               |                              |                                     | <i>Escherichia coli</i>             | NC_015933        | Virology 426:93                         | 72917             |
| A          | KNBP21 (ECBP1?)   |                              |                                     | <i>Escherichia coli</i>             | JX415535         | JViro 86:12439                          | 69855             |
| A          | pSb-1             |                              |                                     | <i>Shigella boydii</i>              | KF620435         | –                                       | 71629             |
| B          | FSL_SP-058        |                              |                                     | <i>Salmonella enterica</i>          | KC139517         | BMCgenomics 14:481                      | 72369             |
| B          | FSL_SP-076        |                              |                                     | <i>Salmonella enterica</i>          | KC139520         | BMCgenomics 14:481                      | 72098             |
| C          | EcP1              |                              |                                     | <i>Enterobacter cloacae</i>         | NC_019485        | –                                       | 59080             |
| D          | Ea9-2             |                              |                                     | <i>Erwinia amylovora</i>            | KF806588         | –                                       | 75568             |
| E          | S6                |                              |                                     | <i>Erwinia amylovora</i>            | HQ728266         | ApplEnvMicro 77:5945                    | 74669             |
| not entero | JWAalpha          |                              |                                     | <i>Achromobacter xylosoxidans</i>   | KF787094         | Viro J 11:14                            | 72329             |
| not entero | JWDelta           |                              |                                     | <i>Achromobacter xylosoxidans</i>   | KF787095         | Viro J 11:14                            | 73659             |
| Lytic12    | 9NA-like          | A                            | 9NA                                 | <i>Salmonella enterica</i>          | KJ802832         | –                                       | 52869             |
|            |                   | A                            | FSL_SP-069 #                        | <i>Salmonella enterica</i>          | KC139632-37      | BMCgenomics 14:481                      | 56593             |
|            |                   | A                            | FSL_SP-062 #                        | <i>Salmonella enterica</i>          | KC139649-51      | BMCgenomics 14:481                      | 56593             |
| Lytic13    | Chi-like          | A                            | Chi (X)                             | <i>Salmonella enterica</i>          | JX094499         | ArchViro 158:2179; Roger Hendrix, unpub | 59578             |
|            |                   | A                            | FSL_SP-030                          | <i>Salmonella enterica</i>          | KC139519         | BMCgenomic 14:481                       | 59746             |
|            |                   | A                            | FSL_SP-039                          | <i>Salmonella enterica</i>          | KC139514         | BMCgenomic 14:481                       | 59815             |
|            |                   | A                            | FSL_SP-088                          | <i>Salmonella enterica</i>          | KC139512         | BMCgenomic 14:481                       | 59454             |
|            |                   | A                            | FSL_SP-124                          | <i>Salmonella enterica</i>          | KC139515         | BMCgenomic 14:481                       | 59245             |
|            |                   | A                            | iEPS5                               | <i>Salmonella enterica</i>          | KC677662         | ApplEnvMicro 79:4829                    | 59254             |
|            |                   | A                            | SPN19                               | <i>Salmonella enterica</i>          | JN871591         | –                                       | 59203             |
|            |                   | B                            | Enc34                               | <i>Enterobacter cancerogenus</i>    | JQ340774         | JViro 86:11403                          | 60384             |
|            |                   | C                            | RedJac                              | <i>Providencia stewartii</i>        | NC_018832        | PLoS One 8:e61762                       | 58104             |
| Lytic14    | øEco32-like       | A                            | Eco32                               | <i>Escherichia coli</i>             | EU330206         | JMolBiol 377:774                        | 77554             |
|            |                   | A                            | KBNP135 (ECBP2)                     | <i>Escherichia coli</i>             | JX415536         | JViro 86:12439                          | 77315             |
|            |                   | A                            | NJ01                                | <i>Escherichia coli</i>             | JX867715         | JViro 86:13874                          | 77448             |
|            |                   | A                            | KBNP1711                            | <i>Escherichia coli</i>             | KF981730         | –                                       | 76184             |
|            |                   | B                            | 7-11                                | <i>Salmonella enterica</i>          | HM997019         | ArchViro156:149                         | 89916             |
| C          | GAP52             | <i>Cronobacter sakazakii</i> | JN882286                            | –                                   | 76631            |                                         |                   |
| Lytic15    | Felix-O1-like     | A                            | Felix-O1                            | <i>Salmonella enterica</i>          | AF320576         | Viruses 2:710                           | 86155             |
|            |                   | A                            | UAB-ø87                             | <i>Salmonella enterica</i>          | JN225449         | –                                       | 87603             |
|            |                   | A                            | FO1a                                | <i>Salmonella enterica</i>          | JF461087         | –                                       | 88331             |
|            |                   | A                            | EC6                                 | <i>Escherichia coli</i>             | JX560968         | GenomeA 1: e00085-12                    | 86231             |
|            |                   | A                            | wV8                                 | <i>Escherichia coli</i>             | EU877232         | ViroJ 6:41                              | 88487             |
|            |                   | A                            | JH2                                 | <i>Escherichia coli</i>             | KF055347         | –                                       | 87721             |
|            |                   | B                            | øEa21-4                             | <i>Erwinia amylovora</i> +others    | EU710883         | ApplEnvMicro 75:2139                    | 84567             |
|            |                   | B                            | øEa104                              | <i>Erwinia amylovora</i>            | FQ482083         | JBact 193:795                           | 84565             |
|            |                   | B                            | M7                                  | <i>Erwinia amylovora</i>            | HQ728263         | ApplEnvMicro 77:5945                    | 84694             |
|            |                   | Lytic16                      | SETP3-like<br>SETP3<br>Supercluster | A                                   | SETP3            | <i>Salmonella enterica</i>              | EF177456          |
| A          | AG11              |                              |                                     | <i>Salmonella enterica</i>          | JX297445         | –                                       | 41546             |
| A          | SETP7             |                              |                                     | <i>Salmonella enterica</i>          | KF562865         | –                                       | 42789             |
| A          | SETP13            |                              |                                     | <i>Salmonella enterica</i>          | KF562864         | –                                       | 42665             |
| A          | Ent1              |                              |                                     | <i>Salmonella enterica</i>          | HE775250         | JGenViro 93:2046                        | 42391             |
| A          | SE2               |                              |                                     | <i>Salmonella enterica</i>          | JQ007353         | JViro 86:7712                           | 43221             |
| A          | SSe3 (KST)        |                              |                                     | <i>Salmonella enterica</i>          | AY730274         | –                                       | 40794             |
| A          | wsk13             |                              |                                     | <i>Salmonella enterica</i>          | JX202565         | ApplEnvMicro 79:1958                    | 42633             |
| A          | FSL_SP-101        |                              |                                     | <i>Salmonella enterica</i>          | KC139511         | BMCgenomics 14:481                      | 41873             |
| A          | Jersey            |                              |                                     | <i>Salmonella enterica</i>          | KF148055         | –                                       | 43447             |
| B          | K1-dep(4) / (K1G) |                              |                                     | <i>Escherichia coli</i>             | GU196277         | Virology 398:79                         | 43587             |
| B          | K1-dep(1) / (K1H) |                              |                                     | <i>Escherichia coli</i>             | GU196278         | Virology 398:79                         | 41632             |
| B          | K1-ind(1)         |                              |                                     | <i>Escherichia coli</i>             | GU196279         | Virology 398:79                         | 42292             |
| B          | K1-ind(2)         |                              |                                     | <i>Escherichia coli</i>             | GU196280         | Virology 398:79                         | 42765             |
| B          | K1-ind(3)         |                              |                                     | <i>Escherichia coli</i>             | GU196281f        | Virology 398:79                         | 43461             |
| C          | FSL_SP-031        |                              |                                     | <i>Salmonella enterica</i>          | KC139518         | BMCgenomics 14:481                      | 42215             |
| D          | Eta (η)           | <i>Serratia marcescens</i>   | KC460990                            | ViroJ 11:6                          | 42724            |                                         |                   |

Table S1

| CLUSTER   | Prototype          | SubClusters | Member phages   | Host                               | Accession number | Sequence publication   | Genome size (kbp) |
|-----------|--------------------|-------------|-----------------|------------------------------------|------------------|------------------------|-------------------|
| Lytic17   | SO-1-like          | A           | SO-1            | <i>Sodalis glossinidius</i>        | GQ502199         | –                      | 45169             |
|           | SETP3 Supercluster | A           | EP23            | <i>Shigella sonnei</i>             | JN984867         | JMicro 49:927          | 44077             |
|           |                    | A           | EEP (SSL-2009a) | <i>Escherichia coli</i>            | FJ750948         | Interviro 53:211       | 39792             |
|           |                    | A           | HK578           | <i>Escherichia coli</i>            | JQ086375         | –                      | 43741             |
|           |                    | A           | JL1             | <i>Escherichia coli</i>            | JX865427         | ArchViro 158:2429      | 43457             |
|           |                    | B           | eiAU            | <i>Edwardsiella ictaluri</i>       | Mark Liles       | Viro 8:6               | 42807             |
|           |                    | B           | eiAu-183        | <i>Edwardsiella ictaluri</i>       | KF772234         | –                      | 43017             |
|           |                    | B           | eiDWF           | <i>Edwardsiella ictaluri</i>       | Mark Liles       | Viro 8:6               | 41999             |
|           |                    | B           | eiMSLS          | <i>Edwardsiella ictaluri</i>       | Mark Liles       | Viro 8:6               | 42460             |
| Lytic18   | ECO1230-10-like    | A           | ECO1230-10      | <i>Escherichia coli</i>            | GU903191         | Ve Microb 148:267      | 41666             |
| Lytic19   | Gj1-like           | A           | Gj1 (øEcoM-Gj1) | <i>Escherichia coli</i>            | EF460875         | AEM 74:516             | 52975             |
|           |                    | B           | PM1             | <i>Pectobacterium carotovorum</i>  | KF534715         | ArchViro 2014 in press | 55098             |
|           |                    | C           | Y2              | <i>Erwinia amylovora</i>           | HQ728264         | AEV 77:5945            | 56621             |
| Lytic20   | PY100-like         | A           | PY100           | <i>Yersinia enterocolitica</i>     | AM076770         | JBact 190:332          | 50291             |
| Lytic21   | ø92-like           | A           | ø92             | <i>Escherichia coli</i>            | FR775895         | J Virol 86:10384       | 148612            |
|           | rV5 Supercluster   | A           | phAPEC8         | <i>Escherichia coli</i>            | JX561091         | J Virol 86:13117       | 147737            |
| Lytic22   | rV5-like           | A           | rV5             | <i>Escherichia coli</i>            | NC_011041        | Viro 10:76             | 137947            |
|           | rV5 Supercluster   | A           | FV3             | <i>Escherichia coli</i>            | JQ031132         | Arch Viro 157:2431     | 136947            |
|           |                    | A           | 2_JES-2013      | <i>Escherichia coli</i>            | NC_022323        | –                      | 136910            |
|           |                    | B           | PVP-SE1         | <i>Salmonella enterica</i>         | GU070616         | J Virol 85:11265       | 145964            |
|           |                    | B           | SSE-121         | <i>Salmonella enterica</i>         | JX181824         | –                      | 147745            |
|           |                    | B           | GAP31           | <i>Cronobacter sakazakii</i>       | JN882284         | J Virol 86:13830       | 147940            |
|           |                    | B           | 4MG             | <i>Escherichia coli</i>            | KF550303         | ArchViro 2014 in press | 148567            |
|           |                    | C           | øTE             | <i>Pectobacterium atrosepticum</i> | NC_020201        | PLoS Genet 8:e1003023  | 142349            |
|           |                    | C           | CR3             | <i>Cronobacter sakazakii</i>       | JQ691612         | JViro 86:6367          | 149273            |
|           |                    | C           | CR9             | <i>Cronobacter sakazakii</i>       | JQ691611         | –                      | 151924            |
| Lytic23   | SPN3US-like        | A           | SPN3US          | <i>Salmonella enterica</i>         | JN641803         | JViro 85:13470         | 240413            |
|           |                    | B           | øEaH2           | <i>Erwinia amylovora</i>           | JX316028         | JViro 86:10899         | 243050            |
|           |                    | C           | CR5             | <i>Cronobacter sakazakii</i>       | NC_021531        | –                      | 233989            |
| Lytic24   | Rak2-like          | A           | RaK2            | <i>Klebsiella sp. KV-3</i>         | JQ513383         | PLoS One 8:e60717      | 345809            |
|           |                    | B           | GAP32           | <i>Cronobacter sakazakii</i>       | JN882285         | –                      | 358663            |
|           |                    | C           | PBECO 4         | <i>Escherichia coli</i>            | KC295538         | ArchViro 158:2399      | 348133            |
| Lytic25   | øR1-37-like        | A           | øR1-37          | <i>Yersinia enterocolitica</i>     | AJ972879         | JViro 86:12625         | 262391            |
| Lytic26   | E1-like            | A           | E1              | <i>Salmonella enterica</i>         | AM491472         | JBact 190:2580         | 45362             |
| Lytic27   | EMCL-117-like      | A           | ECML-117        | <i>Escherichia coli</i>            | JX128258         | –                      | 66854             |
| Lytic28   | KF-1-like          | A           | K1-F            | <i>Edwardsiella tarda</i>          | AB757800         | GenomeA 1:e00089-12    | 41549             |
|           |                    | A           | IW-1            | <i>Edwardsiella tarda</i>          | AB757801         | GenomeA 1:e00089-12    | 41684             |
| Lytic29   | MSW-3-like         | A           | MSW-3           | <i>Edwardsiella tarda</i>          | AB767244         | GenomeA 1:e00248-12    | 42746             |
|           |                    | A           | PEi2            | <i>Edwardsiella ictaluri</i>       | NC_021342        | GenomeA 2:e00228-14    | 43418             |
|           |                    | B           | JD001           | <i>Klebsiella pneumoniae</i>       | JX866719         | JViro 86:13843         | 48814             |
| Lytic30   | Ea35-70-like       | A           | Ea35-70         | <i>Erwinia amylovora</i>           | KF806589         | –                      | 271084            |
| Lytic31   | øEaH1-like         | A           | øEaH1           | <i>Erwinia amylovora</i>           | KF623294         | FEMSMicroLett 350:25   | 218339            |
| Lytic32   | 9g-like            | A           | 9g              | <i>Escherichia coli</i>            | KJ419179         | –                      | 56702             |
| Temperate |                    |             |                 |                                    |                  |                        |                   |
| Temp1     | λ-like             | A           | lambda (λ)      | <i>Escherichia coli</i>            | J02459           | JMolBiol 162: 729      | 48503             |
|           | λ Supercluster     | A           | HK630           | <i>Escherichia coli</i>            | JQ086376         | –                      | 47090             |
|           |                    | A           | HK629           | <i>Escherichia coli</i>            | JQ182735         | –                      | 47288             |
| Temp2     | ø80-like           | A           | ø80             | <i>Escherichia coli</i>            | JX871397         | JBact 194:6802         | 46150             |
|           | λ Supercluster     | B           | HK225           | <i>Escherichia coli</i>            | JQ086371         | –                      | 45366             |
|           |                    | B           | mEp237          | <i>Escherichia coli</i>            | JQ182730         | –                      | 44375             |
| Temp3     | N15-like           | A           | N15             | <i>Escherichia coli</i>            | AF064539         | JMolBiol 299:53        | 46363             |
|           | λ Supercluster     | B           | PY54            | <i>Yersinia enterocolitica</i>     | AJ564013         | JMolBiol 331:605       | 46339             |
|           |                    | C           | øKO2*           | <i>Klebsiella oxytoca</i>          | AY374448         | JBact 186:1818         | 51601             |
| Temp4     | HK97-like          | A           | HK97            | <i>Escherichia coli</i>            | AF069529         | JMolBiol 299:27        | 39732             |
|           | λ Supercluster     | A           | HK022           | <i>Escherichia coli</i>            | AF069308         | JMolBiol 299:27        | 40751             |
|           |                    | A           | HK75            | <i>Escherichia coli</i>            | HM173637         | –                      | 36661             |
|           |                    | A           | HK106           | <i>Escherichia coli</i>            | JQ086369         | –                      | 41468             |
|           |                    | A           | HK140           | <i>Escherichia coli</i>            | JQ086370         | –                      | 40710             |
|           |                    | A           | HK446           | <i>Escherichia coli</i>            | JQ086372         | –                      | 39026             |
|           |                    | A           | HK542           | <i>Escherichia coli</i>            | JQ086373         | –                      | 38964             |
|           |                    | A           | HK544           | <i>Escherichia coli</i>            | JQ086374         | –                      | 40155             |
|           |                    | A           | HK633           | <i>Escherichia coli</i>            | JQ086377         | –                      | 41528             |
|           |                    | A           | mEpX1           | <i>Escherichia coli</i>            | JQ182727         | –                      | 41567             |
|           |                    | A           | mEpX2           | <i>Escherichia coli</i>            | JQ182726         | –                      | 38759             |
|           |                    | A           | mEp234          | <i>Escherichia coli</i>            | JQ182732         | –                      | 39578             |
|           |                    | A           | mEp235          | <i>Escherichia coli</i>            | JQ182731         | –                      | 37595             |
|           |                    | B           | mEp390          | <i>Escherichia coli</i>            | JQ182729         | –                      | 40029             |
|           |                    | C           | ENT39118        | <i>Cronobacter sakazakii</i>       | HQ201307         | JViro 86:5400          | 39012             |
| Temp5     | ES18-like          | A           | ES18            | <i>Salmonella enterica</i>         | AY736146         | JBact 187:1091         | 46900             |
|           | λ Supercluster     | A           | Oslo            | <i>Salmonella enterica</i>         | NC_018279        | –                      | 49116             |
|           |                    | B           | SPN3UB          | <i>Salmonella enterica</i>         | JQ288021         | JViro 86:3404          | 47355             |

Table S1

| CLUSTER | Prototype                       | SubClusters | Member phages    | Host                              | Accession number | Sequence publication | Genome size (kbp) |
|---------|---------------------------------|-------------|------------------|-----------------------------------|------------------|----------------------|-------------------|
| Temp6   | gifsy-2-like<br>λ Supercluster  | A           | gifsy-2          | <i>Salmonella enterica</i>        | NC_010393        | Nature 413:852       | 45841             |
|         |                                 | A           | gifsy-1          | <i>Salmonella enterica</i>        | NC_010392        | Nature 413:852       | 51021             |
|         |                                 | B           | Fels-1           | <i>Salmonella enterica</i>        | NC_010391        | Nature 413:852       | 43667             |
|         |                                 | C           | mEp043           | <i>Escherichia coli</i>           | JQ182734         | –                    | 42780             |
|         |                                 | C           | mEp213           | <i>Escherichia coli</i>           | JQ182733         | –                    | 44120             |
|         |                                 | D           | CP-1639†         | <i>Escherichia coli</i>           | AJ304858         | Microbiology 151:941 | 39445             |
|         |                                 | E           | CTD-lø           | <i>Escherichia coli</i>           | AB285204         | PNAS 104:14483       | 47021             |
|         |                                 | E           | mEp460           | <i>Escherichia coli</i>           | JQ182728         | –                    | 44510             |
|         |                                 | F           | FSL_SP-016 #     | <i>Salmonella enterica</i>        | KC139516         | BMCgenomics 14:481   | 46698             |
| Temp7   | BP-4795-like<br>λ Supercluster  | A           | BP-4795          | <i>Escherichia coli</i>           | AJ556162         | JBact 187:8498       | 57930             |
|         |                                 | A           | 2851             | <i>Escherichia coli</i>           | FM180578         | JBact 76:5466        | 57248             |
|         |                                 | A           | Stx2-1717†       | <i>Escherichia coli</i>           | NC_011357        | –                    | 62147             |
|         |                                 | A           | YYZ-2008         | <i>Escherichia coli</i>           | FJ184280         | –                    | 54896             |
| Temp8   | SFV-like<br>λ Supercluster      | A           | SFV              | <i>Shigella flexneri</i>          | AF339141         | JBact 184:1974       | 37074             |
|         |                                 | A           | SfII             | <i>Shigella flexneri</i>          | NC_021857        | GenomeA 1: e00626-13 | 41459             |
|         |                                 | A           | SfIV             | <i>Shigella flexneri</i>          | KC814930         | BMCgenomics 14:677   | 39758             |
|         |                                 | B           | SfI              | <i>Shigella flexneri</i>          | JX509734         | BMCMicro 13:39       | 38389             |
|         |                                 | C           | øP27             | <i>Escherichia coli</i>           | AJ298298         | Inf Immun 70:1896    | 45575             |
|         |                                 | D           | ST64B†           | <i>Salmonella enterica</i>        | AY055382         | JBact 185:6481       | 40149             |
| Temp9   | P22-like<br>λ Supercluster      | A           | P22              | <i>Salmonella enterica</i>        | BK000583         | JBact 185:1475       | 41724             |
|         |                                 | A           | L                | <i>Salmonella enterica</i>        | AY795968         | –                    | 40679             |
|         |                                 | A           | SPN9CC           | <i>Salmonella enterica</i>        | JF900176         | ApplEnvMicro 80:374  | 40128             |
|         |                                 | A           | ST64T            | <i>Salmonella enterica</i>        | AY052766         | JBact 185:3475       | 40679             |
|         |                                 | A           | ST104            | <i>Salmonella enterica</i>        | AB102868         | JBact 42:1807        | 41391             |
|         |                                 | A           | ST160            | <i>Salmonella enterica</i>        | NC_014900        | –                    | 40986             |
|         |                                 | A           | epsilon34 (ε34)  | <i>Salmonella enterica</i>        | EU570103         | BMCMicro 8:227       | 43016             |
|         |                                 | A           | g341             | <i>Salmonella enterica</i>        | NC_013059        | –                    | 40975             |
|         |                                 | A           | SE1              | <i>Salmonella enterica</i>        | NC_011802        | Virology 351:360     | 41941             |
|         |                                 | A           | Emek             | <i>Salmonella enterica</i>        | JQ806763         | –                    | 39783             |
|         |                                 | A           | ø20 #            | <i>Salmonella enterica</i>        | GQ422450         | –                    | 41809             |
|         |                                 | B           | IME10            | <i>Escherichia coli</i>           | JN600960         | –                    | 39464             |
|         |                                 | B           | Sf6              | <i>Shigella flexneri</i>          | AF547987         | JMolBiol 339:379     | 39044             |
|         |                                 | B           | HK620            | <i>Escherichia coli</i>           | AF335538         | JMolBiol 311:657     | 38297             |
|         |                                 | B           | CUS-3            | <i>Escherichia coli</i>           | CP000711         | JBact 189:6447       | 40207             |
|         |                                 | B           | SPC-P1           | <i>Salmonella enterica</i>        | CP000857*        | BMCgenomics 11:729   | 39659             |
| Temp10  | APSE-1-like<br>λ Supercluster   | A           | APSE-1†          | <i>Hamiltonella defensa</i>       | AF157835         | Virology 262:104     | 36524             |
|         |                                 | A           | APSE-2†          | <i>Hamiltonella defensa</i>       | NC_011551        | PNAS 102:16919       | 39867             |
| Temp11  | 933W-like<br>λ Supercluster     | A           | 933W             | <i>Escherichia coli</i>           | AF125520         | JBact 181:1767       | 61670             |
|         |                                 | A           | stx1ø            | <i>Escherichia coli</i>           | AP005153         | JBact 185:3966       | 59886             |
|         |                                 | A           | stx2ø-l          | <i>Escherichia coli</i>           | AP004402         | Gene 309:35          | 61765             |
|         |                                 | A           | stx2ø-ll         | <i>Escherichia coli</i>           | AP005154         | JBact 185:3966       | 62706             |
|         |                                 | A           | stx2-86†         | <i>Escherichia coli</i>           | NC_008464        | –                    | 60238             |
|         |                                 | A           | min27            | <i>Escherichia coli</i>           | EU311208         | –                    | 63395             |
|         |                                 | A           | ø24B             | <i>Escherichia coli</i>           | HM208303         | BMCgenomics 13:311   | 57677             |
|         |                                 | A           | P13374           | <i>Escherichia coli</i>           | HE664024         | JVirol 86:10444      | 60894             |
|         |                                 | A           | TL-2011c         | <i>Escherichia coli</i>           | JQ011318         | PLoSOne 7:e31413     | 60523             |
|         |                                 | A           | VT2-sakai†       | <i>Escherichia coli</i>           | AP000363         | DNARes 6:235         | 60942             |
|         |                                 | A           | VT2ø_272         | <i>Escherichia coli</i>           | HQ424691         | –                    | 65955             |
| Temp12  | HK639-like<br>λ Supercluster    | A           | HK639            | <i>Escherichia coli</i>           | NC_016158        | –                    | 49576             |
| Temp13  | øES15-like<br>λ Supercluster    | A           | øES15            | <i>Cronobacter sakazakii</i>      | JQ780327         | JVirol 86:7713       | 39974             |
| Temp14  | HS2-like<br>λ Supercluster      | A           | HS2†             | <i>Sodalis glossinidius</i>       | CP006569         | GenBioEvol 6:76      | 58621             |
| Temp15  | ENT47970-like<br>λ Supercluster | A           | ENT47670         | <i>Cronobacter sakazakii</i>      | HQ201308         | –                    | 47611             |
| Temp16  | ZF40-like<br>λ Supercluster     | A           | ZF40             | <i>Pectobacterium carotovorum</i> | NC_019522        | PLoS One 7:e40102    | 48454             |
| Temp17  | øEt88-like<br>λ Supercluster    | A           | øEt88            | <i>Erwinia tasmaniensis</i>       | FQ482085         | JBact 193:795        | 47279             |
| Temp18  | epsilon 15 (ε15)                | A           | epsilon 15 (ε15) | <i>Salmonella enterica</i>        | AY150271         | Virology 369:234     | 39671             |
|         |                                 | B           | SPN1S            | <i>Salmonella enterica</i>        | JN391180         | JVirol 86:1284       | 38684             |
|         |                                 | B           | SPN9TCW          | <i>Salmonella enterica</i>        | JQ691610         | –                    | 38689             |
|         |                                 | B           | SPC32H           | <i>Salmonella enterica</i>        | KC911856         | JVirol 86:11775      | 38689             |
|         |                                 | B           | SPC32N           | <i>Salmonella enterica</i>        | KC911857         | JVirol 86:11775      | 38689             |
|         |                                 | C           | TL-2011b         | <i>Escherichia coli</i>           | JQ011317         | PLoS One 7:e31431    | 44784             |
|         |                                 | D           | øV10             | <i>Escherichia coli</i>           | DQ126339         | FEMSLett 292:182     | 39104             |
| Temp19  | P1-like                         | A           | P1               | <i>Escherichia coli</i>           | AF234172         | JBact 186:7032       | 93601             |
|         |                                 | A           | P7               | <i>Escherichia coli</i>           | AF503408         | –                    | 91660             |
|         |                                 | A           | p0111_2*†        | <i>Escherichia coli</i>           | AP010962         | PNAS 106:17939       | 97897             |

Table S1

| CLUSTER      | Prototype       | SubClusters | Member phages  | Host                          | Accession number | Sequence publication         | Genome size (kbp)             |                  |                 |
|--------------|-----------------|-------------|----------------|-------------------------------|------------------|------------------------------|-------------------------------|------------------|-----------------|
| Temp20       | P2-like         | A           | P2             | <i>Escherichia coli</i>       | AF063097         | numerous publications        | 33593                         |                  |                 |
|              |                 | A           | Wø             | <i>Escherichia coli</i>       | AY135739         | –                            | 32684                         |                  |                 |
|              | P2 Supercluster | A           | L-413C         | <i>Yersinia pestis</i>        | AY251033         | Virology 372:85              | 30728                         |                  |                 |
|              |                 | A           | øAA91-ss       | <i>Escherichia coli</i>       | KF322032         | JVirol 87:13665              | 33628                         |                  |                 |
|              |                 | B           | 186            | <i>Escherichia coli</i>       | U32222           | numerous publications        | 30624                         |                  |                 |
|              |                 | B           | PsP3           | <i>Salmonella enterica</i>    | NC_005340        | Virology 188:414             | 30636                         |                  |                 |
|              |                 | B           | FSL-SP-004     | <i>Salmonella enterica</i>    | KC139521         | BMCgenomics 14:481           | 29742                         |                  |                 |
|              |                 | C           | SopEø          | <i>Salmonella enterica</i>    | AY319521         | JBact 185:5182               | 35155                         |                  |                 |
|              |                 | C           | Fels-2         | <i>Salmonella enterica</i>    | NC_010463        | Nature 413:852               | 33638                         |                  |                 |
|              |                 | C           | RE-2010 (ELøS) | <i>Salmonella enterica</i>    | HM770079         | ApplEnvMicro 78:1785         | 34117                         |                  |                 |
|              |                 | D           | ENT90          | <i>Erwinia amylovora</i>      | HQ110084         | –                            | 29564                         |                  |                 |
|              |                 | Temperate21 | ESSI-2-like    | A                             | ESSI-2           | <i>Cronobacter sakazakii</i> | HQ110083                      | ArchViro 156:721 | 28765           |
|              |                 |             |                | P2 supercluster               | not entero       | øCTX                         | <i>Pseudomonas aeruginosa</i> | AB008550         | MolMicro 31:399 |
|              | not entero      |             | RSA1           | <i>Ralstonia solanacearum</i> | AB276040         | JBact 190:143                | 38760                         |                  |                 |
|              | not entero      |             | KL3            | <i>Burkholderia cepacia</i>   | GU911304         | BMCGenomics 11:599           | 40555                         |                  |                 |
|              | not entero      |             | øMHaA1         | <i>Mannheimia haemolytica</i> | NC_008201        | Virology 350:79              | 34525                         |                  |                 |
|              | not entero      |             | HP1            | <i>Haemophilus influenzae</i> | NC_001697        | NucleicAcidRes 24:685        | 32355                         |                  |                 |
|              | not entero      |             | K139           | <i>Vibrio cholerae</i>        | NC_003313        | JBact 184:6592               | 33106                         |                  |                 |
| Temperate22  | Mu-like         | A           | Mu             | <i>Escherichia coli</i>       | AF083977         | JMolBiol 317: 337            | 36717                         |                  |                 |
|              |                 | A           | D108           | <i>Escherichia coli</i>       | GQ357916         | –                            | 37235                         |                  |                 |
|              |                 | not entero  | DMS3           | <i>Pseudomonas aeruginosa</i> | DQ631426         | JBact 191:210                | 36415                         |                  |                 |
|              |                 | not entero  | MP22           | <i>Pseudomonas aeruginosa</i> | DQ873690         | Microbiology 153:2885        | 34409                         |                  |                 |
|              |                 | not entero  | SuMu           | <i>Haemophilus</i>            | JF832915         | BMCGenomics 13:331           | 37151                         |                  |                 |
| Temperate23* | SSU5-like       | A           | SSU5           | <i>Salmonella enterica</i>    | JQ965645         | JVirol 86:10894              | 103229                        |                  |                 |
|              |                 | A           | pECHO89        | <i>Escherichia coli</i>       | HG530657         | Gen Ann 2: e00356-14         | 111741                        |                  |                 |
|              |                 | A           | pLF82*†        | <i>Escherichia coli</i>       | CU638872         | PLoSOne 5:e12714             | 108379                        |                  |                 |
|              |                 | A           | pHCM2*†        | <i>Salmonella enterica</i>    | NC_003385        | Plasmid 47:159               | 106516                        |                  |                 |
|              |                 | A           | pKPHS1*†       | <i>Klebsiella pneumoniae</i>  | CP003223         | JBact 194:1841               | 122799                        |                  |                 |
|              |                 | B           | pMT1*†         | <i>Yersinia pestis</i>        | AF074611         | Inf Immun 66:5731            | 100900                        |                  |                 |
| Temperate24  | PEP14-like      | A           | pEP-14         | <i>Erwinia pyrifoliae</i>     | JN585957         | –                            | 60714                         |                  |                 |



## SUPPLEMENTARY FIGURES

## Phage genome dot plot locations

| Cluster                   | Prototype phage | Dot plot figures       |
|---------------------------|-----------------|------------------------|
| Lytic 1                   | T1              | 2*, S1A, S2A*, S2B*    |
| Lytic 2                   | T4              | 1*, 5, S2A*, S1B, S1M* |
| Lytic 3                   | Vi01            | 1*, S1C, S1M*, S2A*    |
| Lytic 4                   | T5              | 1*, S1D, S1M*, S2A*    |
| Lytic 5                   | T7              | 2*, 6, S1E, S1F, S2B*  |
| Lytic 6                   | SP6             | 2*, 6, S1E, S1F, S2B*  |
| Lytic 7                   | KP34            | 2*, 6, S1E, S1F, S2B*  |
| Lytic 8                   | LIMEzero        | 2, 6, S1E, S1F, S2B*   |
| Lytic 9                   | øKT             | 2, 6, S1E, S1F, S2B*   |
| Lytic 10                  | GAP227          | 2*, 6, S1E, S1F, S2B*  |
| Lytic 11                  | N4              | 2*, S1H, S2B*          |
| Lytic 12                  | 9NA             | 2*, S1G, S2B*          |
| Lytic 13                  | Chi             | 2*, S1I, S2B*          |
| Lytic 14                  | øEco32          | 2*, S1J, S2B*          |
| Lytic 15                  | Felix-O1        | 2*, 4, S1K, S2B*       |
| Lytic 16                  | SETP3           | 2*, S1L, S2B*          |
| Lytic 17                  | SO-1            | 2*, S1L, S2B*          |
| Lytic 18                  | ECO1230-10      | 2, S1G, S2B*           |
| Lytic 19                  | Gj1             | 2*, S1G, S2B*          |
| Lytic 20                  | PY100           | 2, S1G, S2B*           |
| Lytic 21                  | Ø92             | 1*, S1M, S2A*          |
| Lytic 22                  | rv5             | 1*, S1M, S2A*          |
| Lytic 23                  | SPN3US          | 1*, S1M, S2A*          |
| Lytic 24                  | Rak2            | 1, S1M, S2A*           |
| Lytic 25                  | øR1-37          | 1, S1M, S2A*           |
| Lytic 26                  | E1              | 2, S1G, S2B*           |
| Lytic 27                  | EMCL-117        | 2, S1G, S2B*           |
| Lytic 28                  | KF-1            | 2*, S1G, S2B*          |
| Lytic 29                  | MSW-3           | 2*, S1G, S2B*          |
| Lytic 30                  | Ea35-70         | 1, S1M, S2A*           |
| Lytic 31                  | øEaH1           | 1, S1M, S2A*           |
| Lytic 32                  | 9g              | 2, S1G, S2B*           |
| Temperate 1               | Lambda          | 3*, 7, S1N, S1S, S2C*  |
| Temperate 2               | ø80             | 3*, 7, S1N, S1S, S2C*  |
| Temperate 3               | N15             | 3*, 7, S1N, S1S, S2C*  |
| Temperate 4               | HK97            | 3*, 7, S1O, S1S, S2C*  |
| Temperate 5               | ES18            | 3*, 7, S1O, S1S, S2C*  |
| Temperate 6               | Gifsy-2         | 3*, 7, S1P, S1S, S2C*  |
| Temperate 7               | BP-4795         | 3*, 7, S1P, S1S, S2C*  |
| Temperate 8               | SfV             | 3*, 7, S1R, S1S, S2C*  |
| Temperate 9               | P22             | 3*, 7, S1Q, S1S, S2C*  |
| Temperate 10              | APSE-1          | 3, 7, S1Q, S1S, S2C*   |
| Temperate 11              | 933W            | 3*, 7, S1R, S1S, S2C*  |
| Temperate 12              | HK639           | 3, 7, S1S, S2C*        |
| Temperate 13              | øES15           | 3, 7, S1S, S2C*        |
| Temperate 14              | HS2             | 3, 7, S1S, S2C*        |
| Temperate 15              | ENT47670        | 3, 7, S1S, S2C*        |
| Temperate 16              | ZF40            | 3, 7, S1S, S2C*        |
| Temperate 17              | øEt88           | 3, 7, S1S, S2C*        |
| Temperate 18              | ε15             | 3*, S1T, S2C*          |
| Temperate 19              | P1              | 1*, S1U                |
| Temperate 20              | P2              | 3*, S1V, S2C*          |
| Temperate 21              | ESSI-2          | 3, S1V, S2C*           |
| Temperate 22              | Mu              | 3, S1W, S2C*           |
| Temperate 23 <sup>5</sup> | SSU5            | 1*, S1U                |
| Temperate 24              | pEP-14          | 3, S2C*                |

\* Representative members of cluster shown.

## SUPPLEMENTARY FIGURE LEGENDS

**Figure S1A. Genome and MCP dot plots of all the phages in the T1-like cluster.**

Gepard dot plots of genome nucleotide sequence (above) and MCP amino acid sequence (below) are shown with Gepard word lengths and hosts indicated. Thin red lines separate the different phage sequences, and thick red lines separate subclusters; subcluster names are indicated by red letters on the left.

**Figure S1B. MCP dot plot of all the phages in the T4-like cluster.**

A Gepard dot plot of MCP sequences is shown with Gepard word lengths and hosts indicated. Thin red lines separate the different phage sequences, and thick red lines separate subclusters; subcluster names are indicated by red letters on the left.

**Figure S1C. Genome and MCP dot plots of the phages in the Vi01-like cluster.**

Gepard dot plots of genome nucleotide sequence (above) and MCP amino acid sequence (below) are shown with Gepard word lengths and hosts indicated. Thin red lines separate the different phage sequences, and thick red lines separate subclusters; subcluster names are indicated by red letters on the left.

**Figure S1D. Genome and MCP dot plots of the phages in the T5-like cluster.**

Gepard dot plots of genome nucleotide sequence (above) and MCP amino acid sequence (below) are shown with Gepard word lengths and hosts indicated. Thin red lines separate the different phage sequences, and thick red lines separate subclusters; subcluster names are indicated on the left.

**Figure S1E. MCP dot plot of all the phages in the T7 supercluster.**

A Gepard dot plot of MCP sequences is shown with Gepard word lengths and hosts indicated. Thin red lines separate the different phage sequences, and thick red lines separate subclusters; subcluster names are indicated by red letters on the left. An apparent frameshift sequencing error in the MCP of phage YpsP-G was “fixed” in this plot by comparison with close relatives. For ease of comparison to figure S1F, only those phages whose genomes have been suitably annotated for the whole proteome plots are included.

**Figure S1F. Genome product dot plot of all the *Enterobacteriaceae* phages in the T7 supercluster.**

A Gepard dot plot of complete genome product sequences is shown with Gepard word lengths and hosts indicated. Thin red lines separate the different phage sequences, and thick red lines separate subclusters; subcluster names are indicated by red letters on the left. Annotation for phages Vi03, Vi04, Vi05 and Vi06 has not been released so these phages are not shown in this plot.

**Figure S1G. Genome and MCP dot plots of all the phages in 9NA-, ECO-1230-, Gj1-, PY100-, EMCL-117-, KF-1-, MSW-3- and 9g-like small lytic phage clusters.**

Gepard dot plots of genome nucleotide sequence (above) and MCP amino acid sequence (below) are shown with Gepard word lengths and hosts indicated. Thin red lines separate the different phage sequences,

and thick red lines separate subclusters; subcluster names are indicated by red letters on the left.

**Figure S1H. Genome and MCP dot plots of all the phages in the N4-like supercluster.** Gepard dot plots of genome nucleotide sequence (above) and MCP amino acid sequence (below) are shown with Gepard word lengths and hosts indicated. Thin red lines separate the different phage sequences, and thick red lines separate subclusters; subcluster names are indicated by red letters on the left.

**Figure S1I. Genome and MCP dot plots of all the phages in the Chi-like cluster.** Gepard dot plots of genome nucleotide sequence (above) and MCP amino acid sequence (below) are shown with Gepard word lengths and hosts indicated. Thin red lines separate the different phage sequences, and thick red lines separate subclusters; subcluster names are indicated by red letters on the left.

**Figure S1J. Genome and MCP dot plots of all of the phages in the øEco32-like cluster.** Gepard dot plots of genome nucleotide sequences (above) and MCP amino acid sequence (below) are shown with Gepard word lengths and hosts indicated. Thin red lines separate the different phage sequences, and thick red lines separate subclusters; subcluster names are indicated by red letters on the left. We note that genomes in this cluster that have been carefully analyzed have direct terminal repeats. These have been variably reported as a single copy on either end of the sequence or with the full repeats on both ends. The sequences used were those reported in GenBank, so the apparent 'movement' of terminal sequence to different ends of the genomes in the genome plot at least in part reflect this reporting inconsistency.

**Figure S1K. MCP dot plot of all the phages in the Felix-O1-like cluster.** A gepard dot plot of MCP amino acid sequences (below) is shown with Gepard word lengths and hosts indicated. Thin red lines separate the different phage sequences, and thick red lines separate subclusters; subcluster names are indicated by red letters on the left.

**Figure S1L. Genome and MCP dot plots of all the phages in the SETP3- and SO-1-like clusters.** Gepard dot plots of genome nucleotide sequences (above) and MCP amino acid sequence (below) are shown with Gepard word lengths and hosts indicated. Thin red lines separate the different phage sequences, and thick red lines separate subclusters; subcluster names are indicated by red letters on the left.

**Figure S1M. Genome and MCP dot plots of all the phages in ø92-, rV5-, SPN3US-, Rak2-, øR1-37-, Ea35-70- and øEaH1-like large lytic clusters.** Gepard dot plots of genome nucleotide sequences (above) and MCP amino acid sequence (below) are shown with Gepard word lengths and hosts indicated. Thin red lines separate the different phage sequences, and thick red lines separate subclusters; subcluster names are indicated by red letters on the left.

**Figure S1N. Genome dot plots of all the phages in the lambda-, ø80 and N15-like clusters.** Gepard dot plots of genome nucleotide sequences are shown with Gepard word lengths. Thin red lines separate the different phage sequences, and thick red lines separate subclusters; subcluster names are indicated by red letters on the left. See figure S1S for MCP dot plots and figures 7 and S1S for phage hosts.

**Figure S1O. Genome dot plots of all the phages in the HK97- and ES18-like clusters.** A Gepard dot plots of genome nucleotide sequences are shown with Gepard word lengths. Thin red lines separate the different phage sequences, and thick red lines separate subclusters; subcluster names are indicated by red letters on the left. See figure S1S for MCP dot plots and figures 7 and S1S for phage hosts.

**Figure S1P. Genome dot plots of all the phages in the gfsy-2- and BP4795-like clusters.** Gepard dot plots of genome nucleotide sequences are shown with Gepard word lengths. Thin red lines separate the different phage sequences, and thick red lines separate subclusters; subcluster names are indicated by red letters on the left. See figure S1S for MCP dot plots and figures 7 and S1S for phage hosts.

**Figure S1Q. Genome dot plots of all the phages in the P22- and APSE-1-like clusters.** Gepard dot plots of genome nucleotide sequences are shown with Gepard word lengths. Thin red lines separate the different phage sequences, and thick red lines separate subclusters; subcluster names are indicated by red letters on the left. See figure S1S for MCP dot plots and figures 7 and S1S for phage hosts.

**Figure S1R. Genome dot plot of all the phages in the SfV- and 933W-like cluster.** A Gepard dot plot of genome nucleotide sequences are shown with Gepard word lengths. Thin red lines separate the different phage sequences, and thick red lines separate subclusters; subcluster names are indicated by red letters on the left. See figure S1S for an MCP dot plot.

**Figure S1S. MCP dot plot of all the phages in the lambda supercluster.** A Gepard dot plot of MCP sequences is shown with Gepard word lengths and hosts indicated. Thin red lines separate the different phage sequences, and blue lines separate clusters; cluster names are indicated on the left. An apparent frameshift error in the MCP of phage Stx2ø-I was “fixed” in this plot by comparison with close relatives.

**Figure S1T. Genome and MCP dot plots of all the phages in the epsilon 15-like cluster.** Gepard dot plots of genome nucleotide sequences (above) and MCP amino acid sequence (below) are shown with Gepard word lengths and hosts indicated. Thin red lines separate the different phage sequences, and thick red lines separate subclusters; subcluster names are indicated by red letters on the left.

**Figure S1U. Genome and MCP dot plots of all the phages in the P1- and SSU5-like clusters.** Gepard dot plots of genome nucleotide sequences (above) and MCP amino acid sequence (below) are shown with Gepard word lengths and hosts indicated. Thin red lines separate the different phage sequences, thick red lines separate subclusters, and blue lines separate clusters; subcluster names are indicated by red letters on the left.

**Figure S1V. Genome and MCP dot plots of all the phages in the P2- and ESS1-2-like clusters.** Gepard dot plots of genome nucleotide sequences (above) and MCP amino acid sequence (below) are shown with Gepard word lengths and hosts indicated. Thin red lines separate the different phage sequences, thick red lines separate subclusters, and blue lines separate clusters; subcluster names are indicated by red letters on the left.

**Figure S1W. Genome and MCP dot plots of all the phages in the Mu-like cluster.** Gepard dot plots of genome nucleotide sequences (above) and MCP amino acid sequence (below) are shown with Gepard word lengths and hosts indicated. Thin red lines separate the different phage sequences, thick red lines separate subclusters, and blue lines separate clusters; subcluster names are indicated by red letters on the left.

**Figure S2A. MCP dot plot analysis of representative *Enterobacteriaceae* tailed phages with genomes larger than 90 kbp.** See figure 1 in text of report for host genera.

**Figure S2B. MCP dot plot analysis of representative lytic *Enterobacteriaceae* tailed phages with genomes smaller than 90 kbp.** See figure 2 in text of report for host genera.

**Figure S2C. MCP dot plot analysis of representative temperate *Enterobacteriaceae* tailed phages with genomes smaller than 90 kbp.** See figure 3 in text of report for host genera.

**Figure S3. Genomic maps of a representative phage from each of the six T7 supercluster clusters.** The maps indicate conservation of T7 RNA polymerase as well as DNA metabolism, structural, and cell lysis proteins. Phage maps were created by Phamerator, and boxes for gene products are labeled with predicted function, occasionally numbered, and colored manually to indicate similar function. Abbreviations are: host restriction inhibitor (Ocr), deoxyguanosine triphosphate (dGTP), deoxynucleotide monophosphate (dNMP), deoxyribonucleotide monophosphatase (dRMPase), single strand binding protein (SSB), endonuclease (Endo.), exonuclease (Exo.), polymerase (pol.), DNA ligase (ligase), major capsid protein (MCP), small terminase (TerS), large terminase (TerL).

**Figure S4. Genes of phages ZF40 and øEt88 that are homologous and syntenic with phage lambda cluster genomes.** ORF maps were created by Phamerator and colored manually. Predicted ORFs that are transcribed rightward and leftward are shown as boxes above and below the central

scale, respectively. The predicted encoded proteins were compared to the current protein database by blastp searches. Matches to other members of the lambda supercluster are indicated above each map with the percent AA identity and encoding phage of the best hits. These ORFs are colored yellow. Those few matches that are not syntenic (homologous genes lie in substantially different locations in the genome in these two phages than in other lambda supercluster phages) are marked by asterisks. Convincing matches to other phages outside this supercluster are indicated below the maps. These early region proteins have substantial syntenic homology with lambda cluster phages, and most of the lambda supercluster “non-matches” lie in the head and tail genes. We conclude that both ZF40 and øET88 are lambda supercluster members with unique sets of head and tail genes.

**Figure S5. Neighbor-joining tree of the MCPs of the currently known members of the lambda supercluster.** Clustal X was used to create the tree, and the nineteen major branches (MCP major sequence types) are indicated by colored boxes. The cluster to which the encoding phages belong is shown on the right. Note that lambda, ø80, gfsy-1 and N15 MCPs form four more closely related subtypes within the same branch. In addition, the MCPs of phage mEp235, FSL\_SP-016, CUS-3/SPC-P1, Sf6/HK620 and SfV are very different from those of other members of their cluster. Finally, we note that the Sf6/HK620 MCP type, while being encoded by phages in the P22-like cluster, are quite similar to APSE-1-like phage MCPs.

**Figure S6. Examples of horizontal exchange within the lambda supercluster.** Nucleotide sequence dot plots created by DNA Strider with a scanning window stringency of 15/23 are shown. The genomes are all oriented so that *terS* is the leftmost gene and the rest of the late operon virion assembly genes at its immediate right. The late operon is indicated by black arrows and the early left and right operons are indicated by gray arrows. Phages SPN3UB and FSL\_SP-016 have large genomic sections that are similar to different clusters within the lambda supercluster. The SPN3UB plots show that its late region is largely similar to ES18 and its early region is largely similar to FSL\_SP-016.

**Figure S7. Examples of mosaicism among phages in the HK97-like cluster.** Nucleotide sequence dot plots created by DNA Strider with a scanning window stringency of 15/23 are shown. The genome orientation is the same as in figure S5, and gene functions and the location of the MCP gene are indicated above and below. Phage mEp253 has head genes that are unique and very different from HK97 and the rest of the cluster (see text), while HK542 and mEpX1 have virion assembly genes very similar to HK97 and early regions that show different mosaic relationships with HK97.

# T1-like Cluster

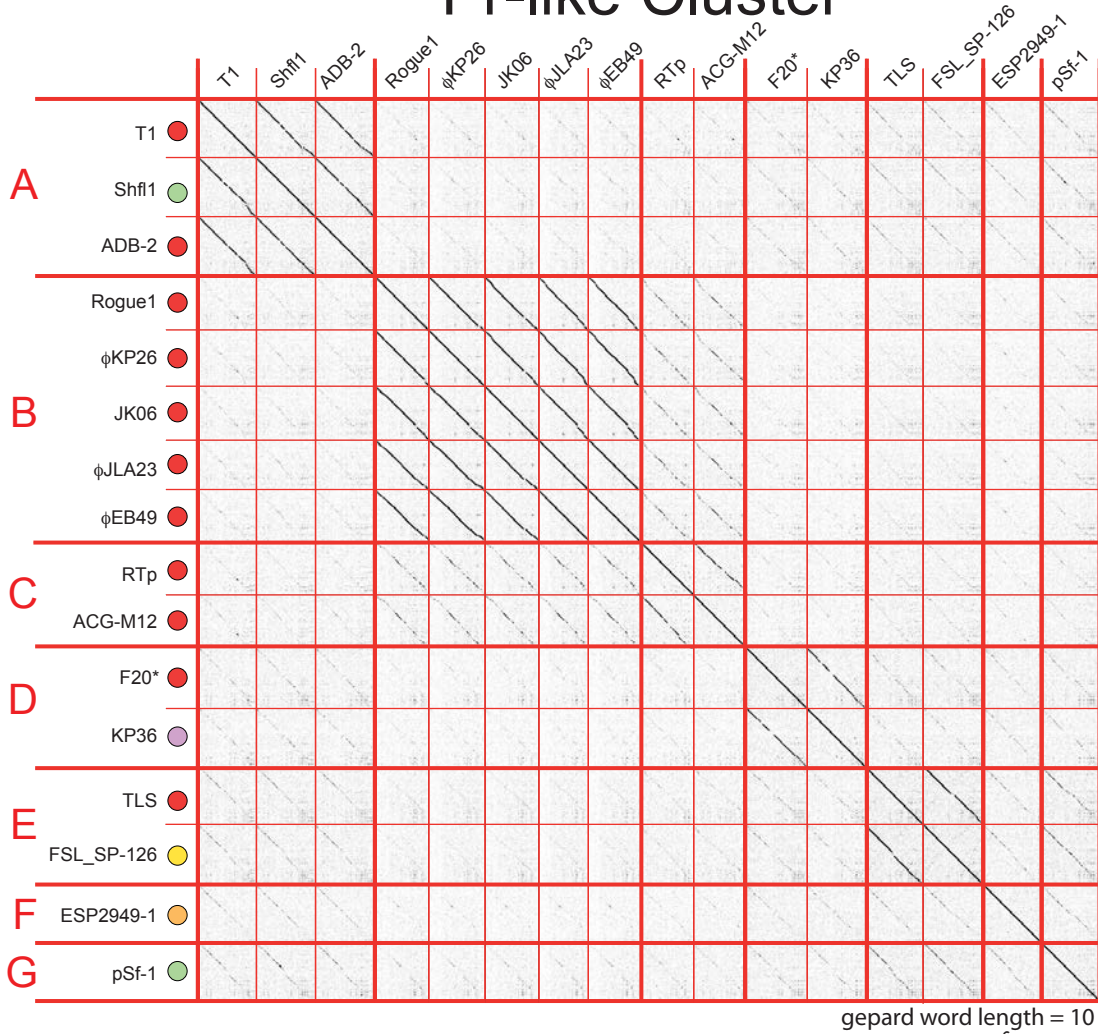

Genomes

- *Coronobacter*
- *Escherichia*
- *Klebsiella*
- *Salmonella*
- *Shigella*

\* Sequence not complete

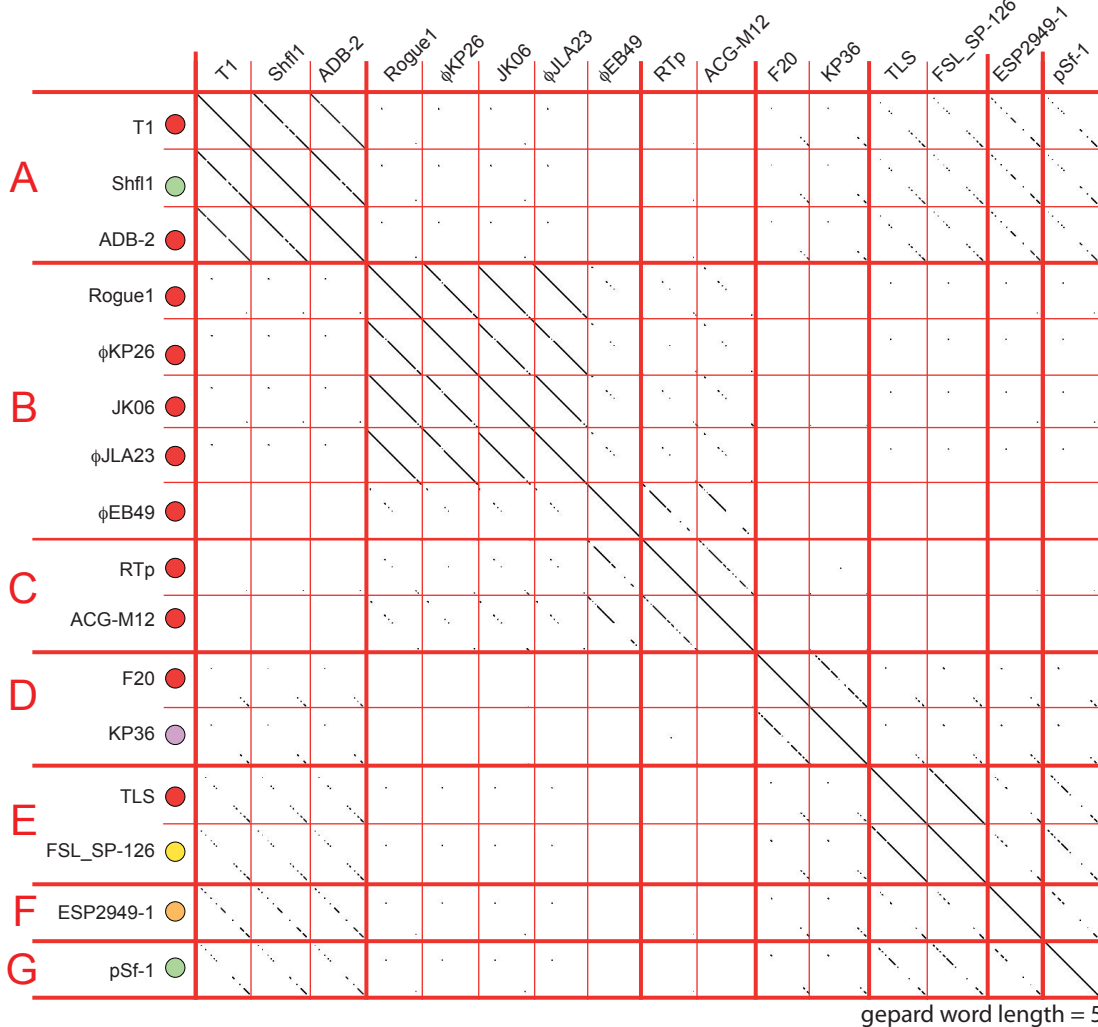

MCPs

T4-like Cluster MCPs

- *Coronobacter*
- *Enterobacter*
- *Escherichia*
- *Klebsiella*
- *Salmonella*
- *Serratia*
- *Shigella*
- *Yersinia*
- outside the
- *Enterobacteriaceae*
- *Acinetobacter*
- *Sterotrophomonas*
- *Aeromonas*

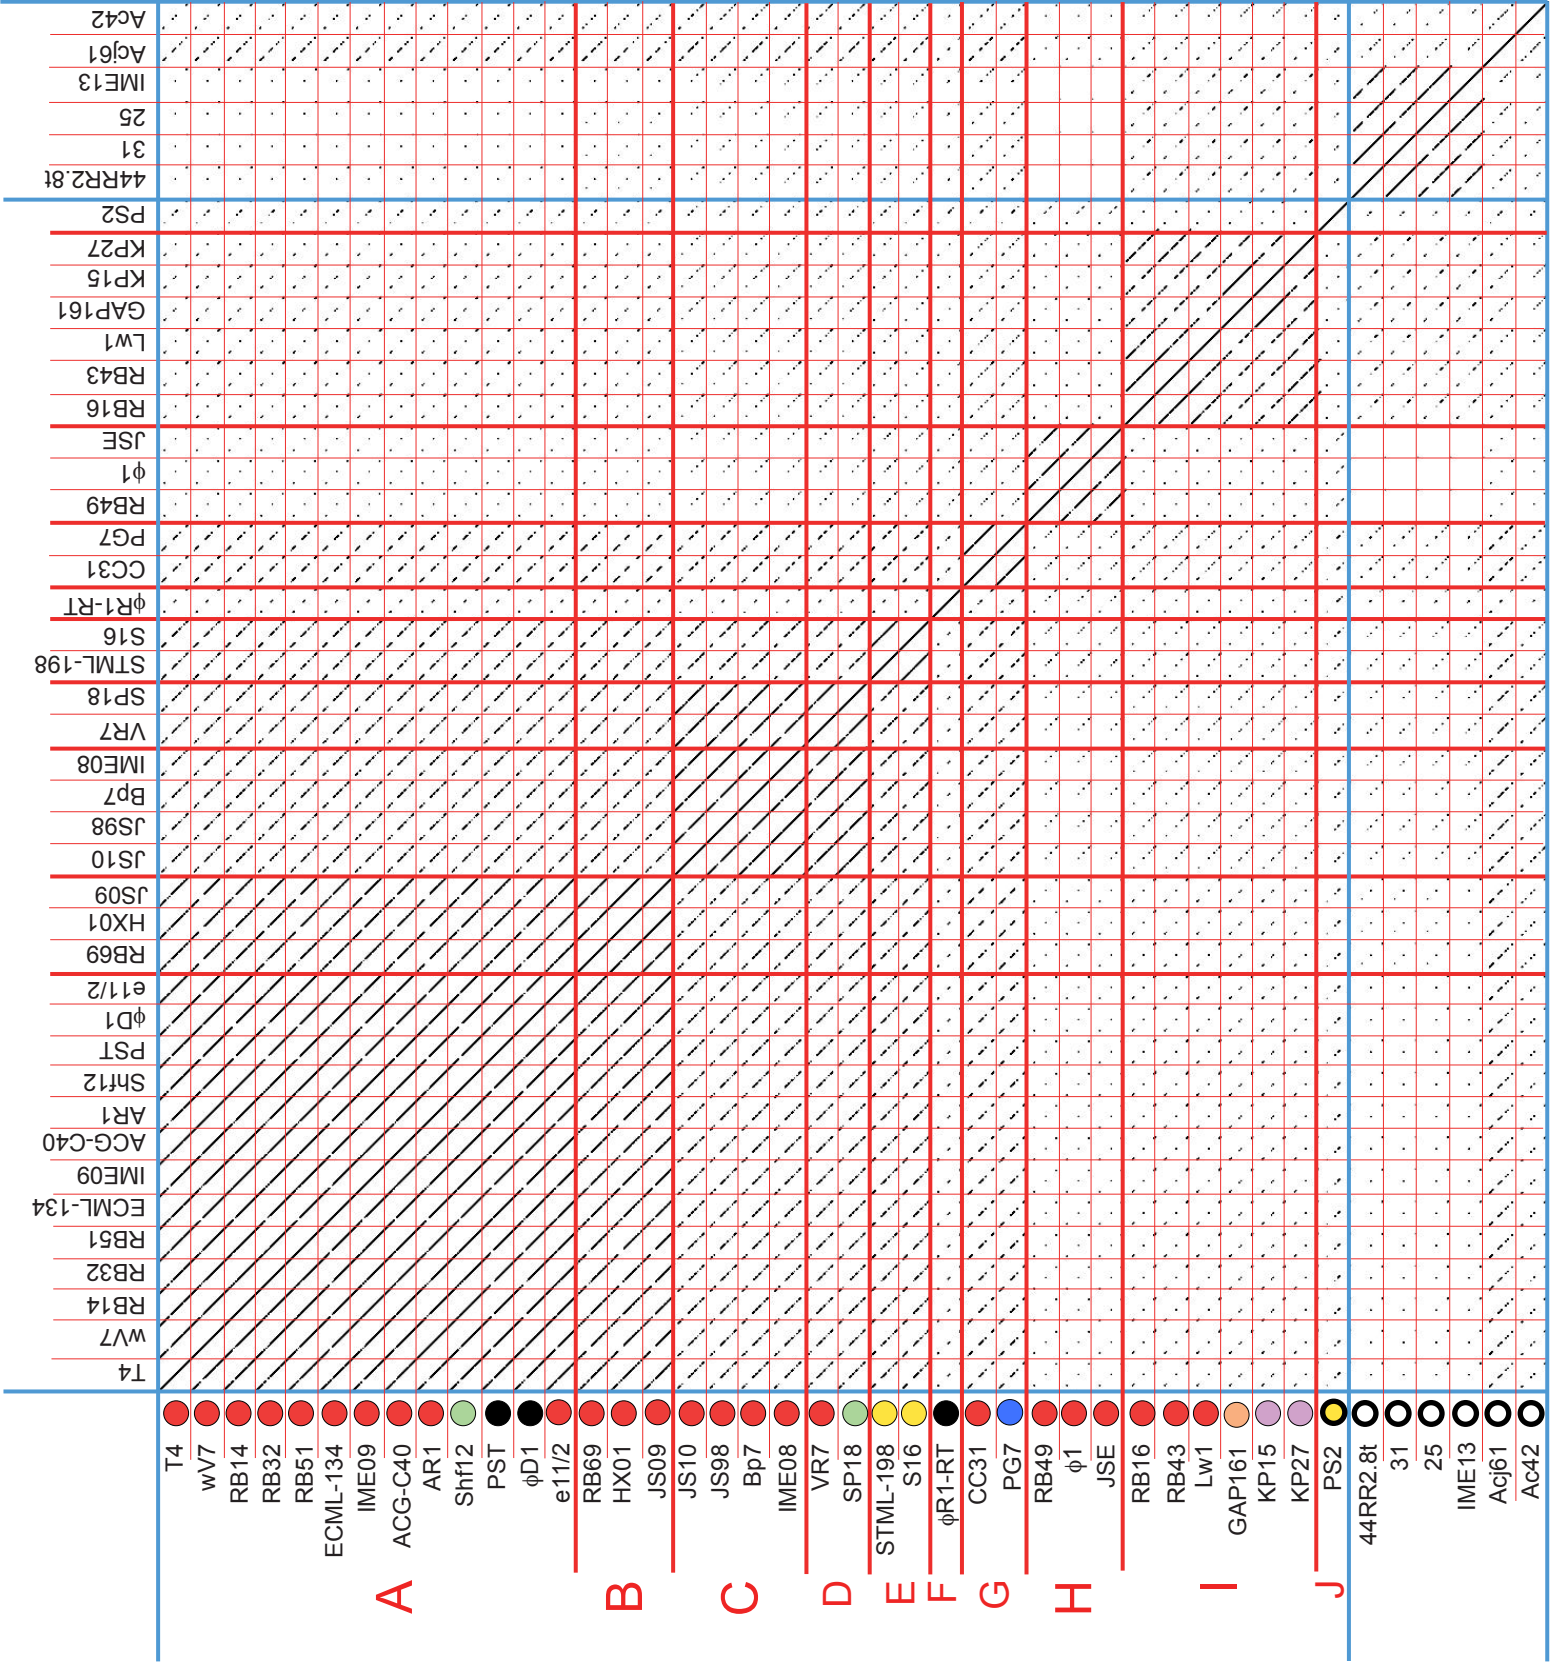

Gepard word length = 10



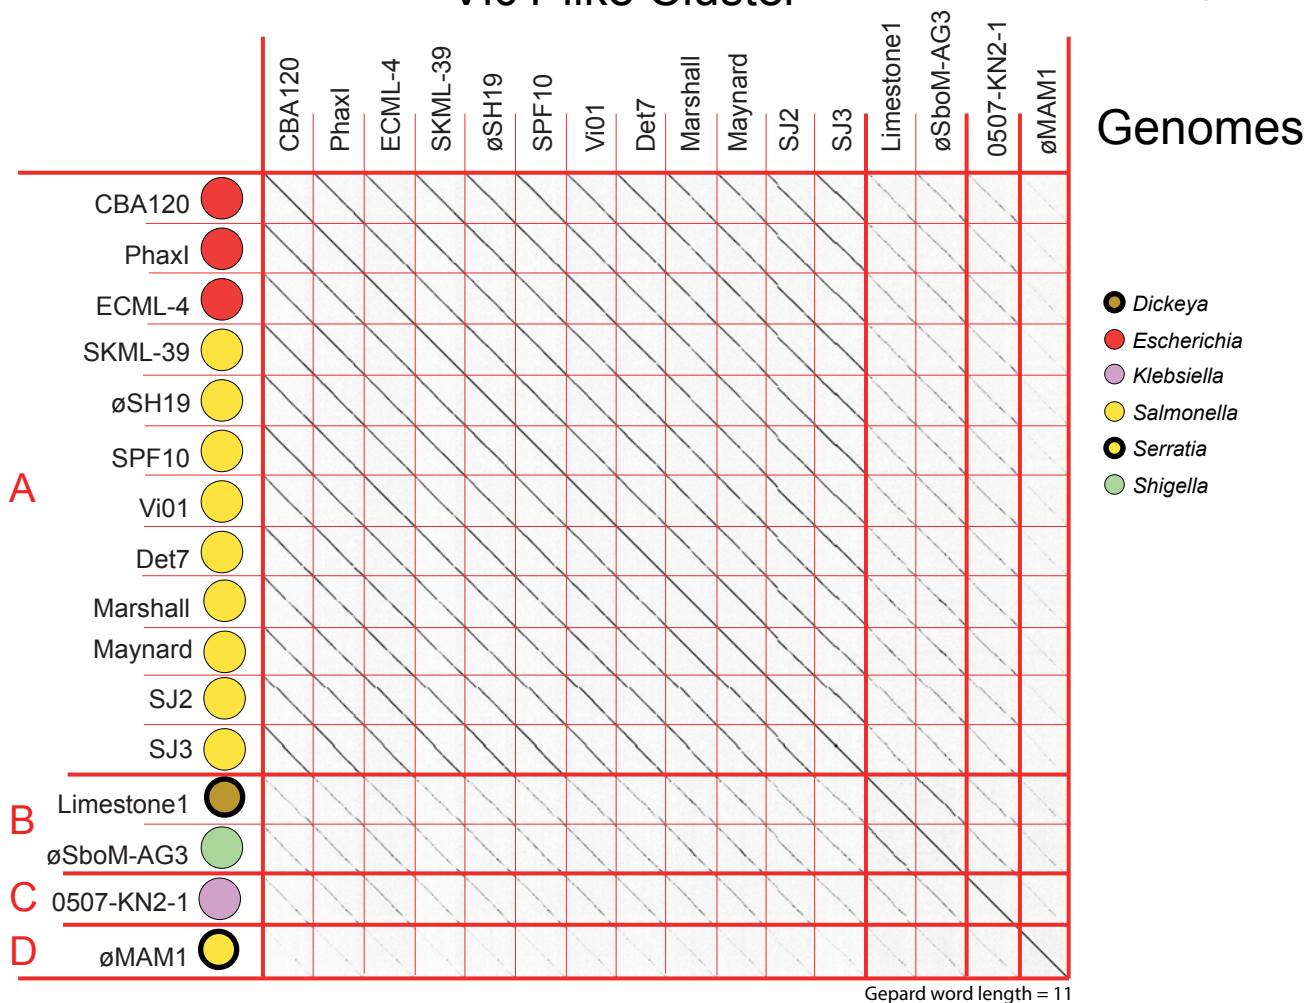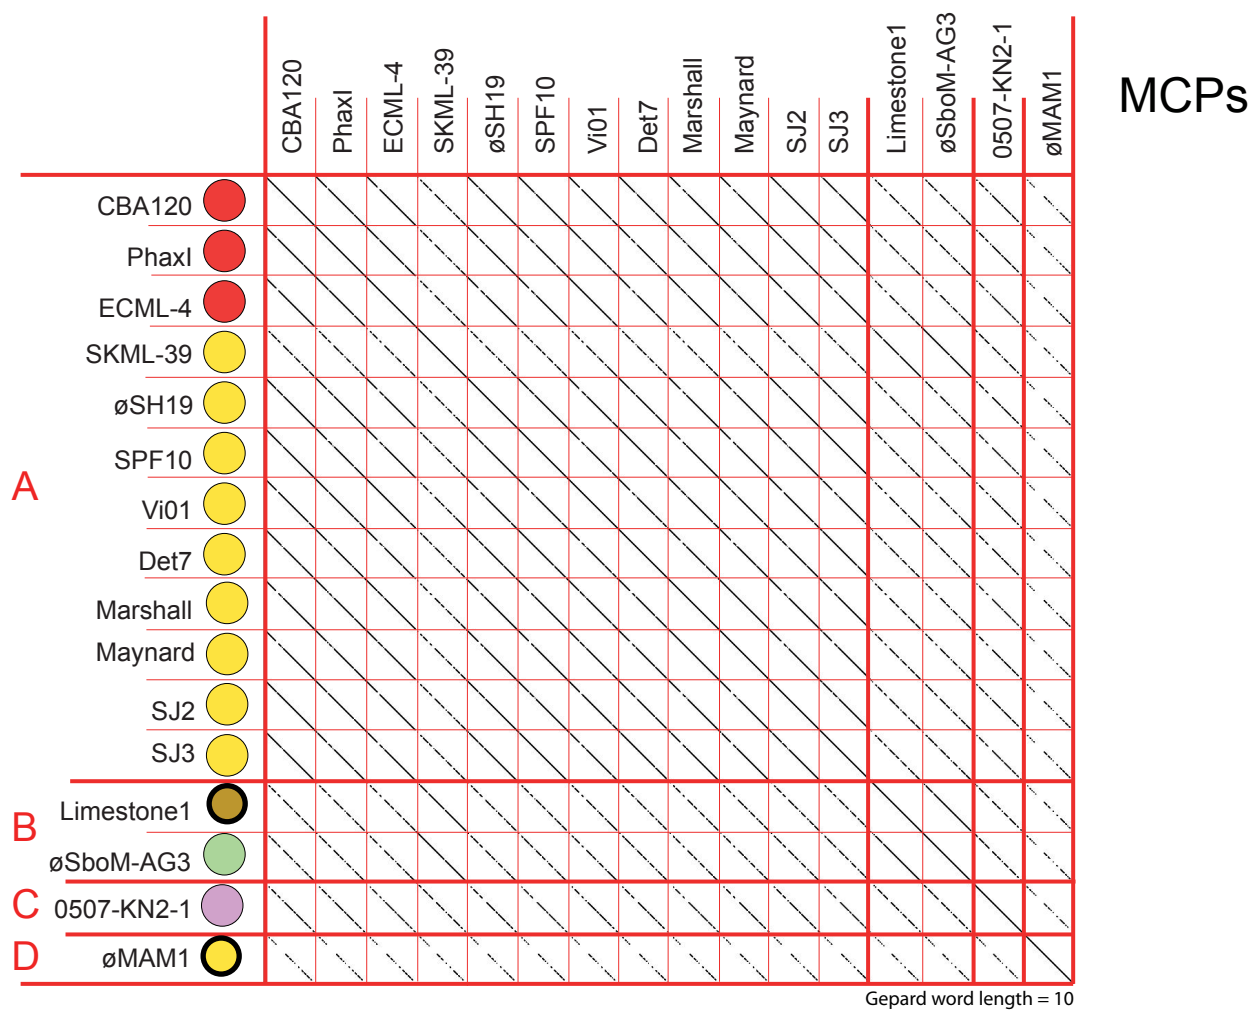

# T5-like Cluster

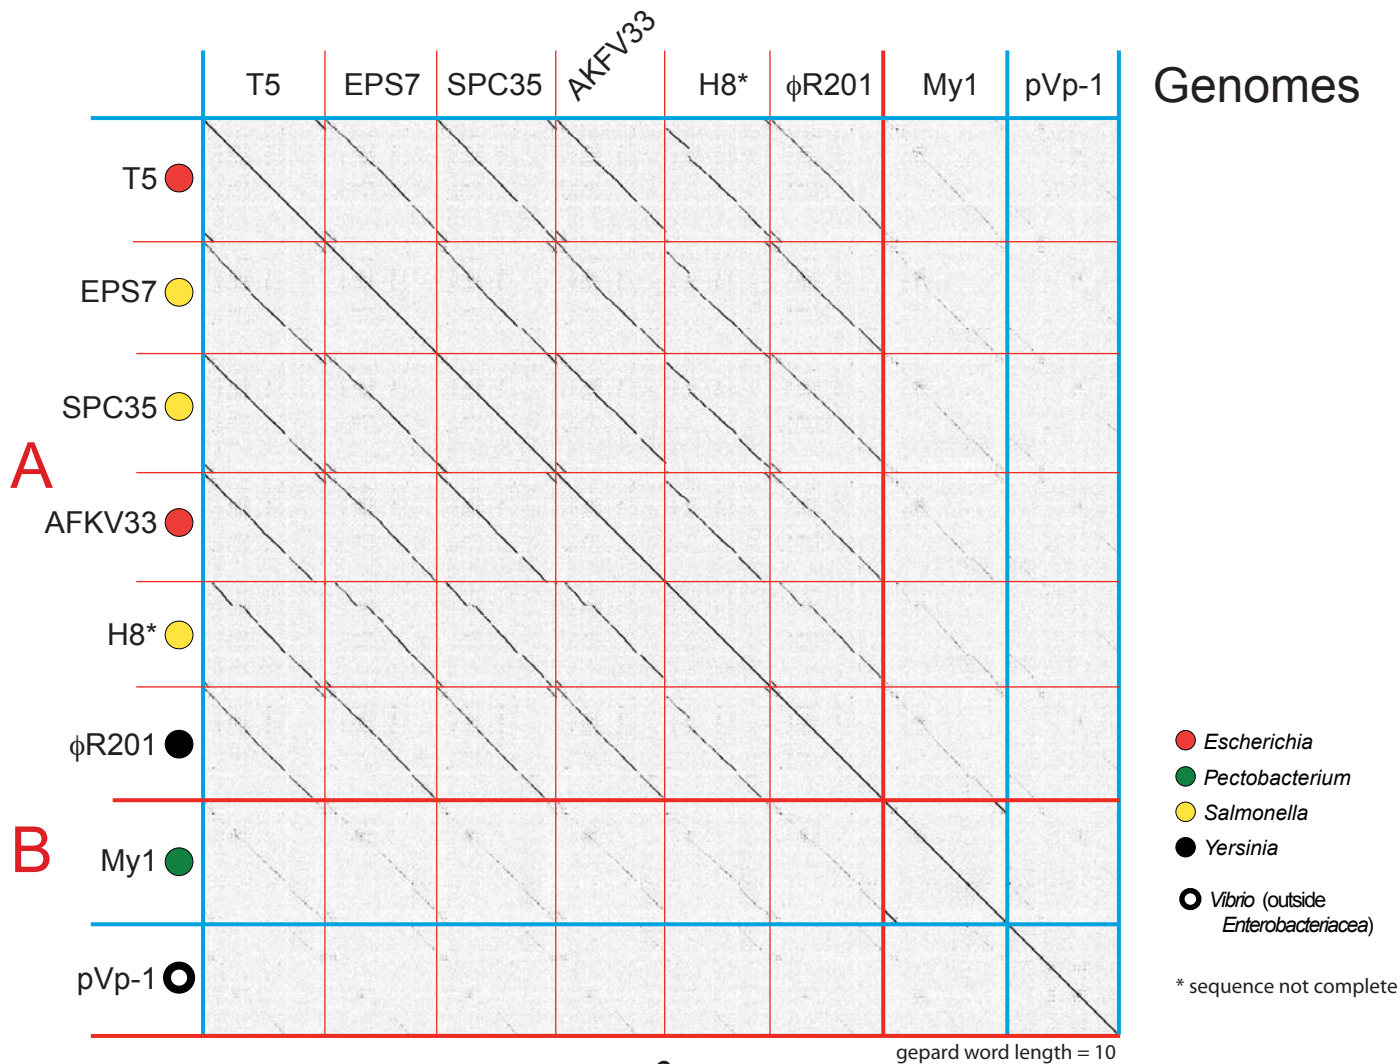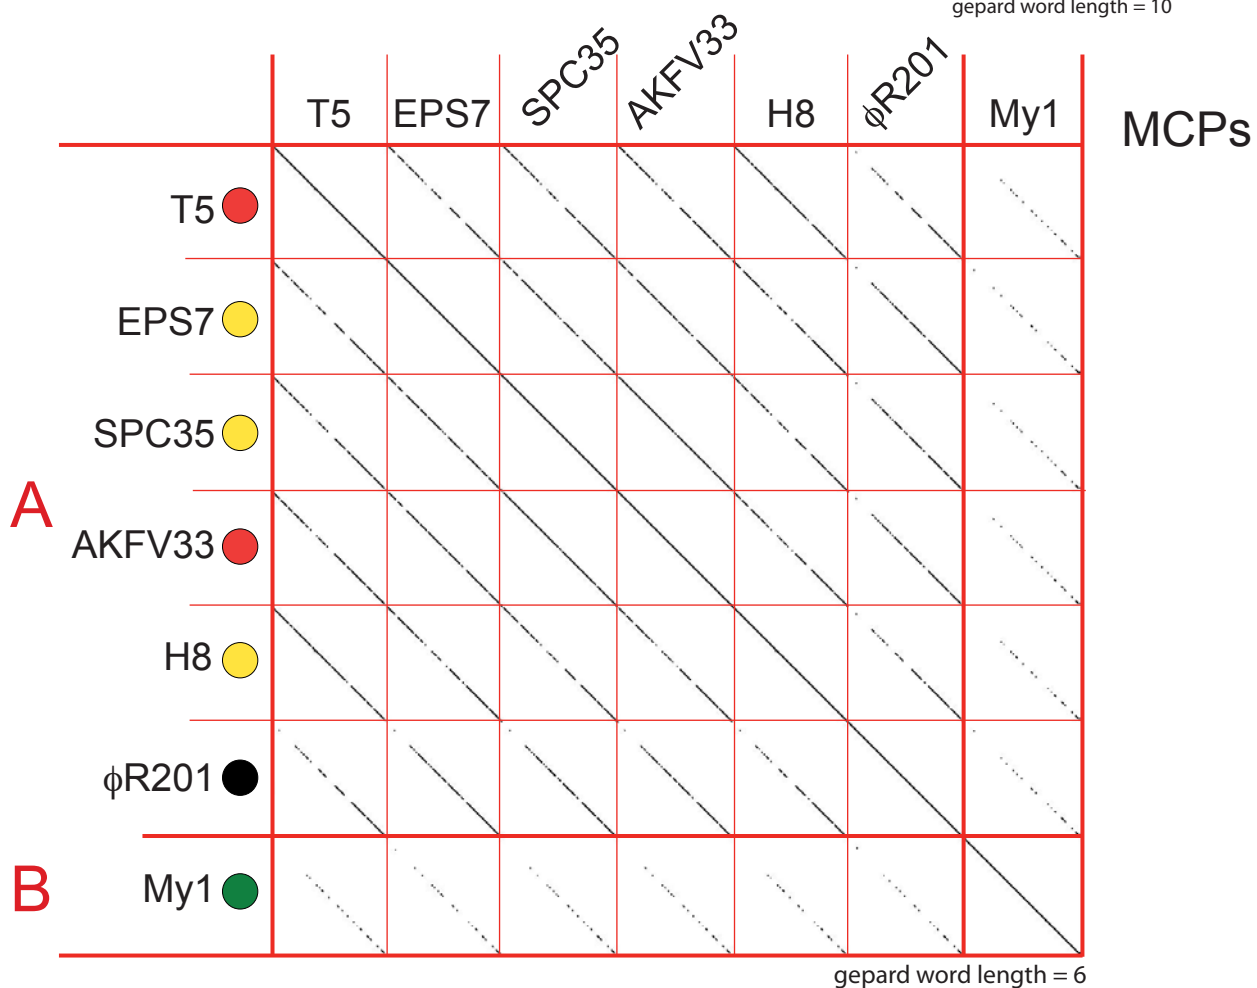

# T7 MCP dot plot

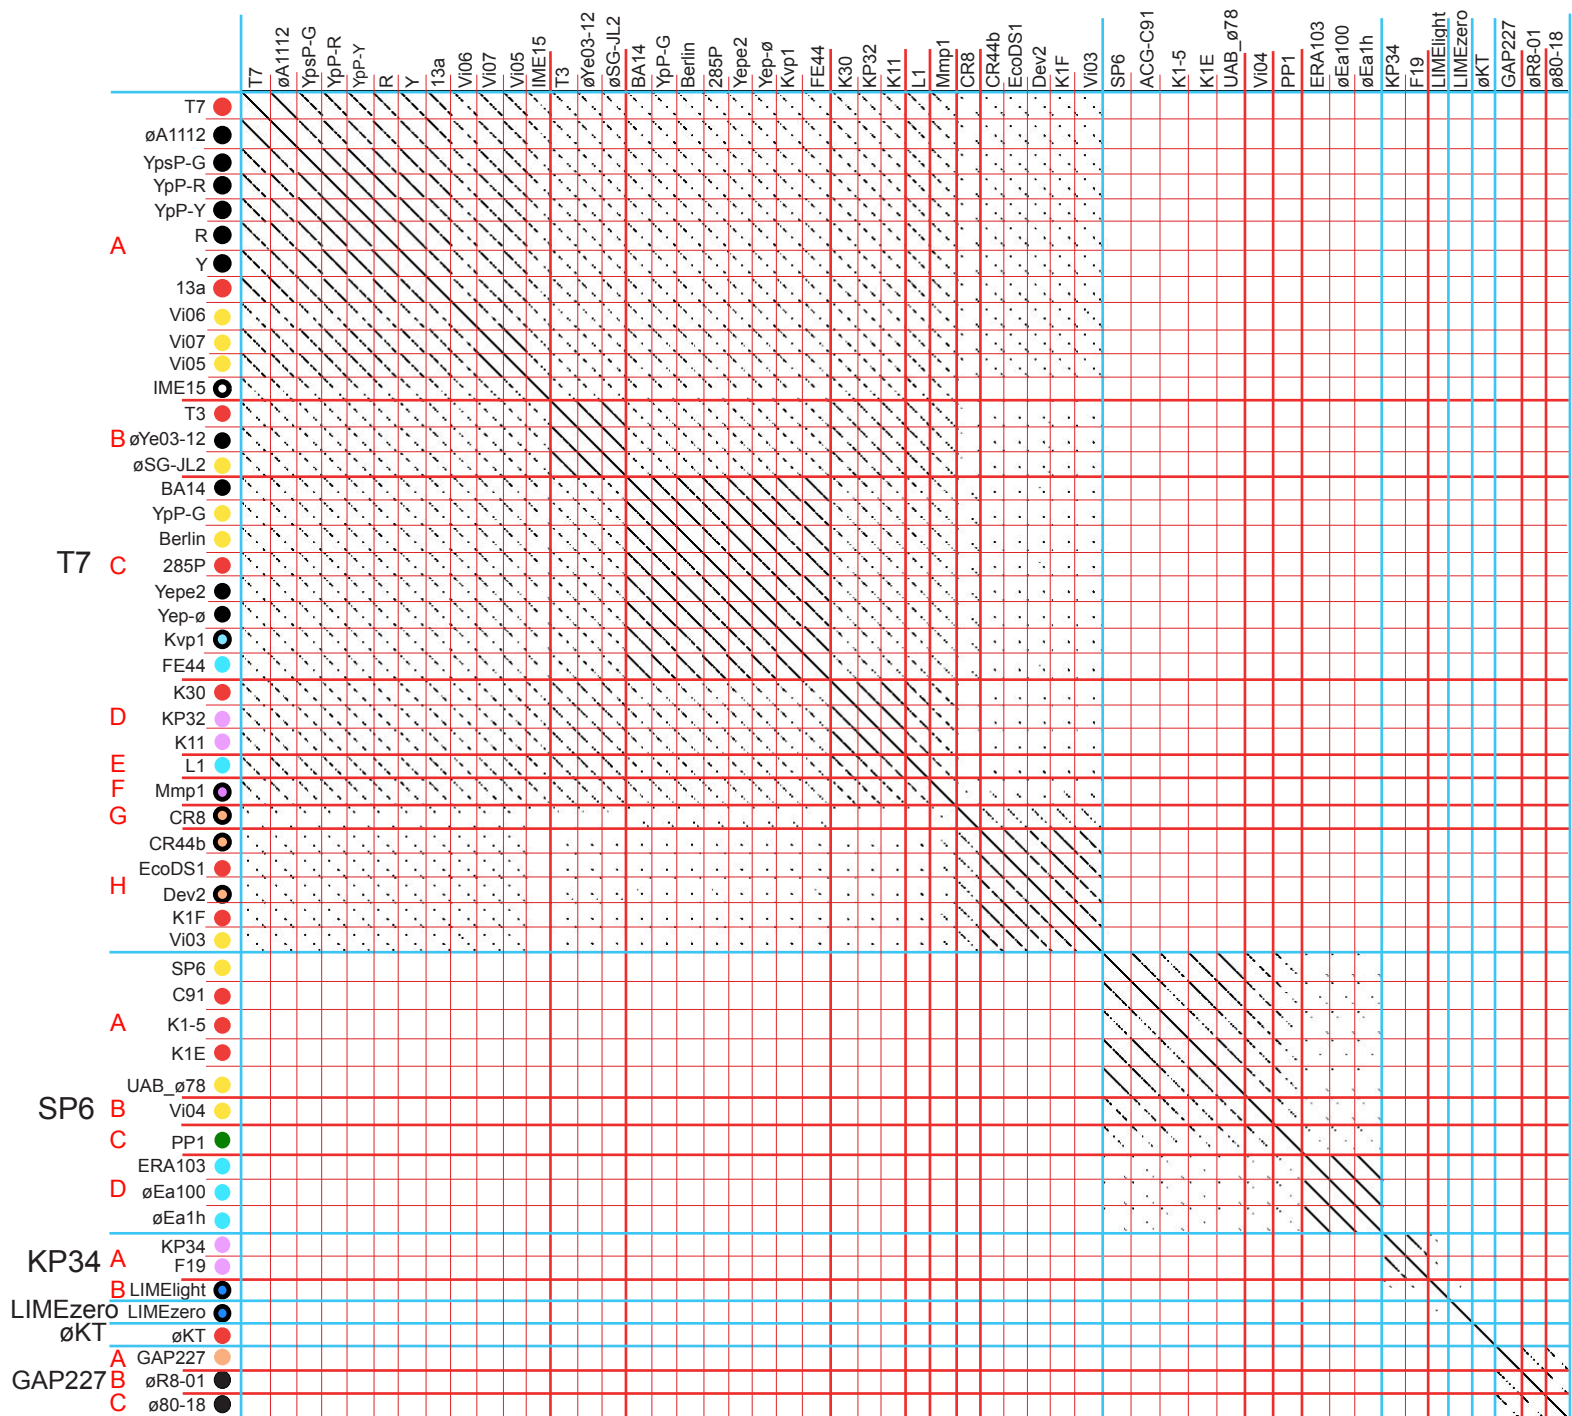

# T7 whole gene product dot plot

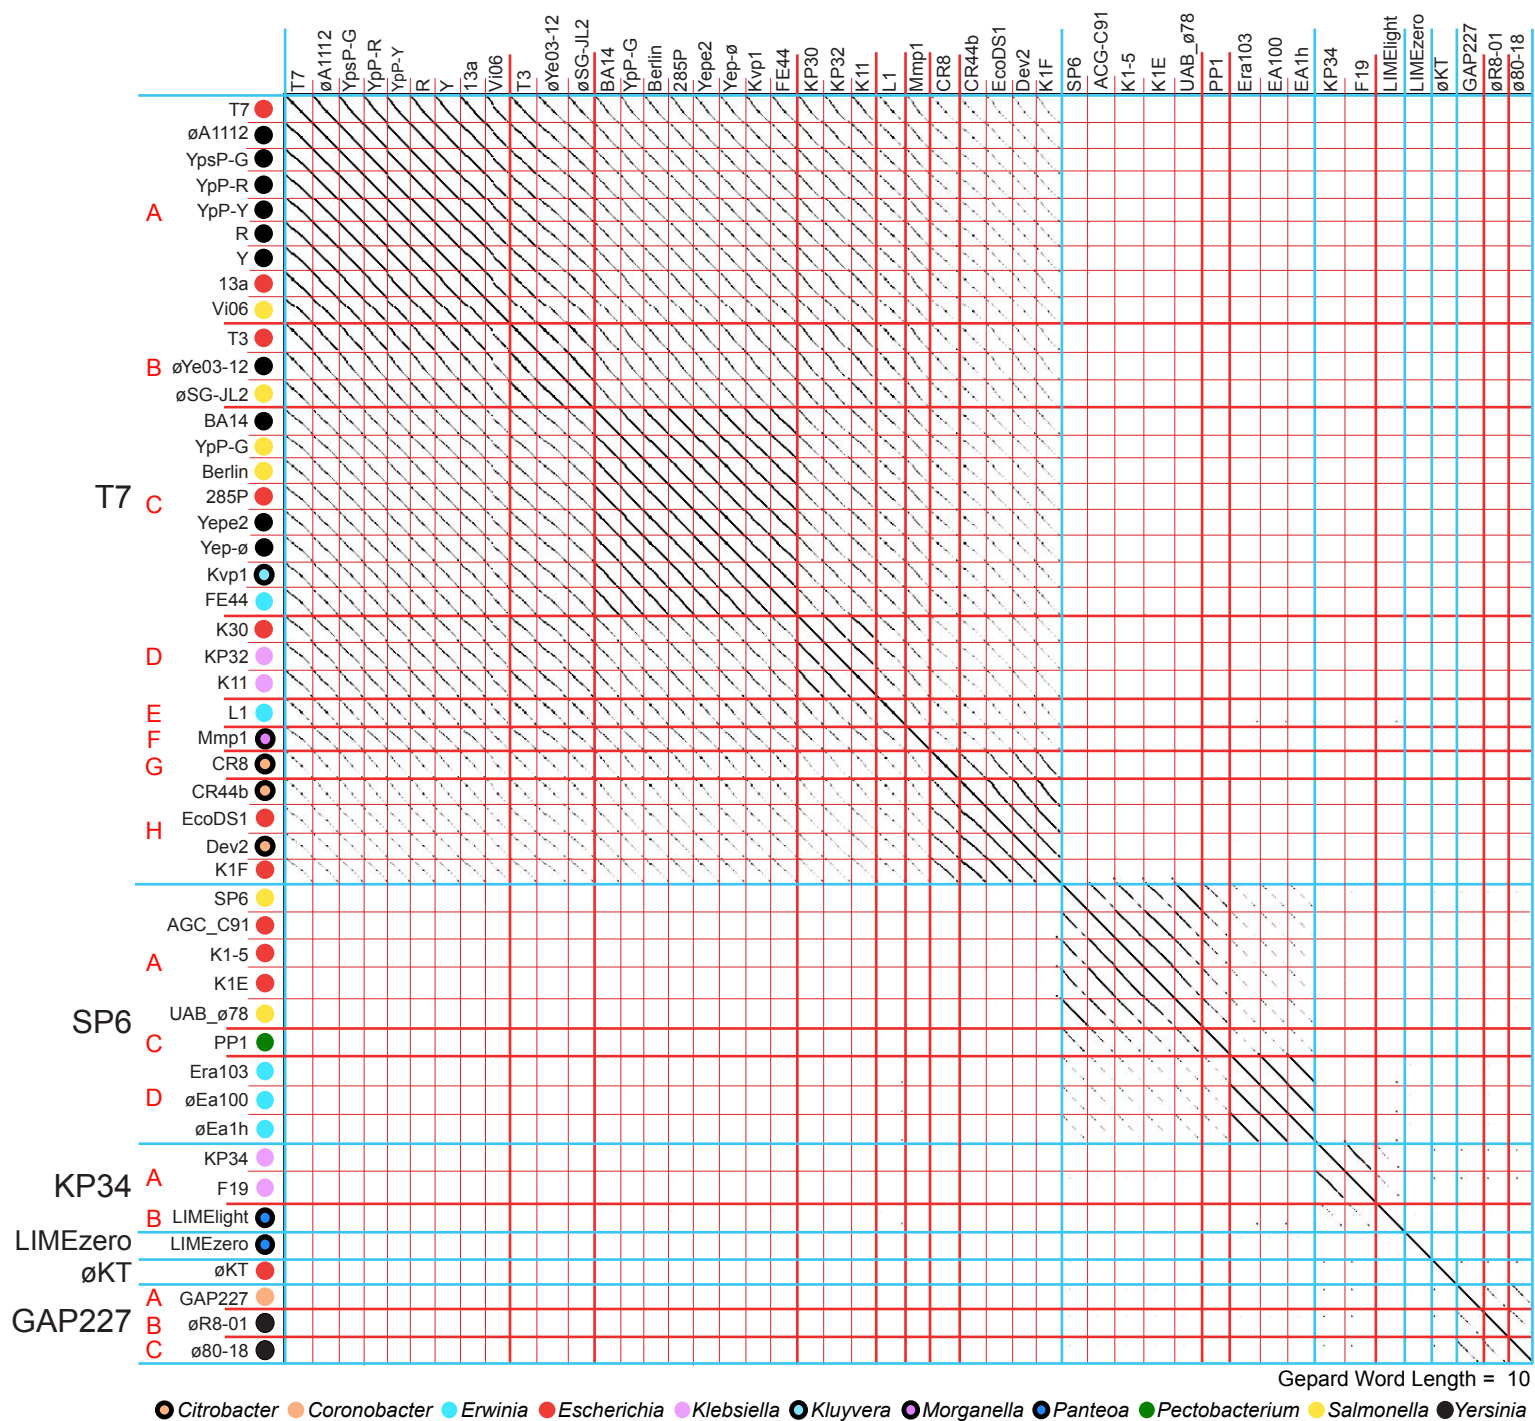

# Nine Small Lytic Phage Clusters

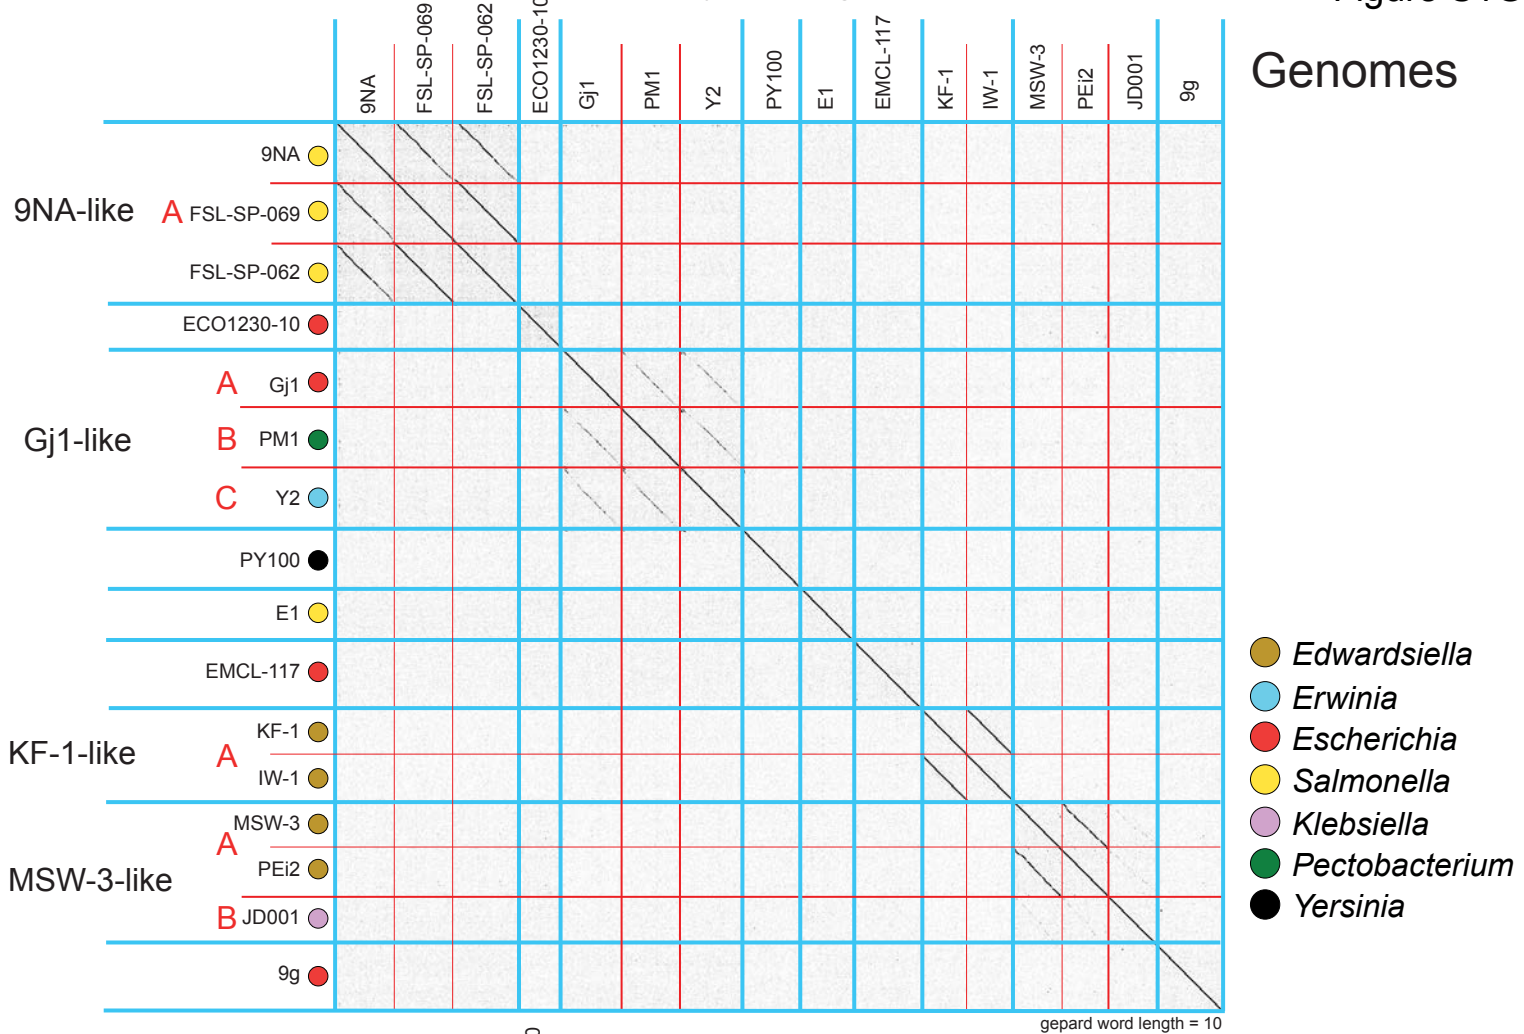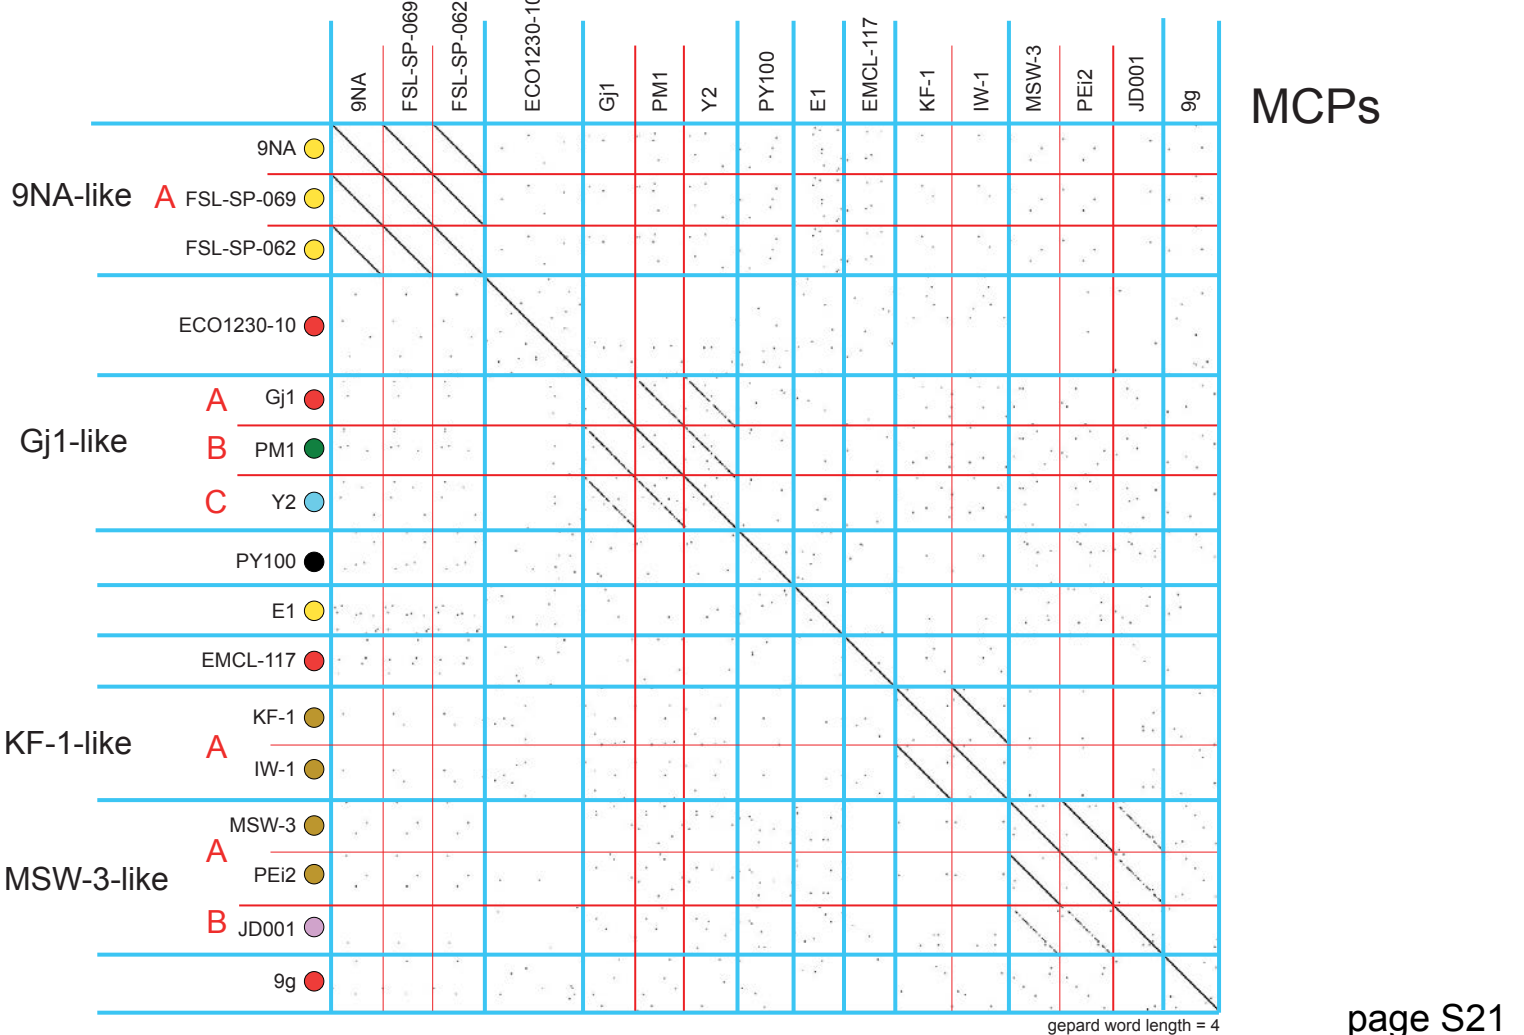

# N4-like Cluster

## Genomes

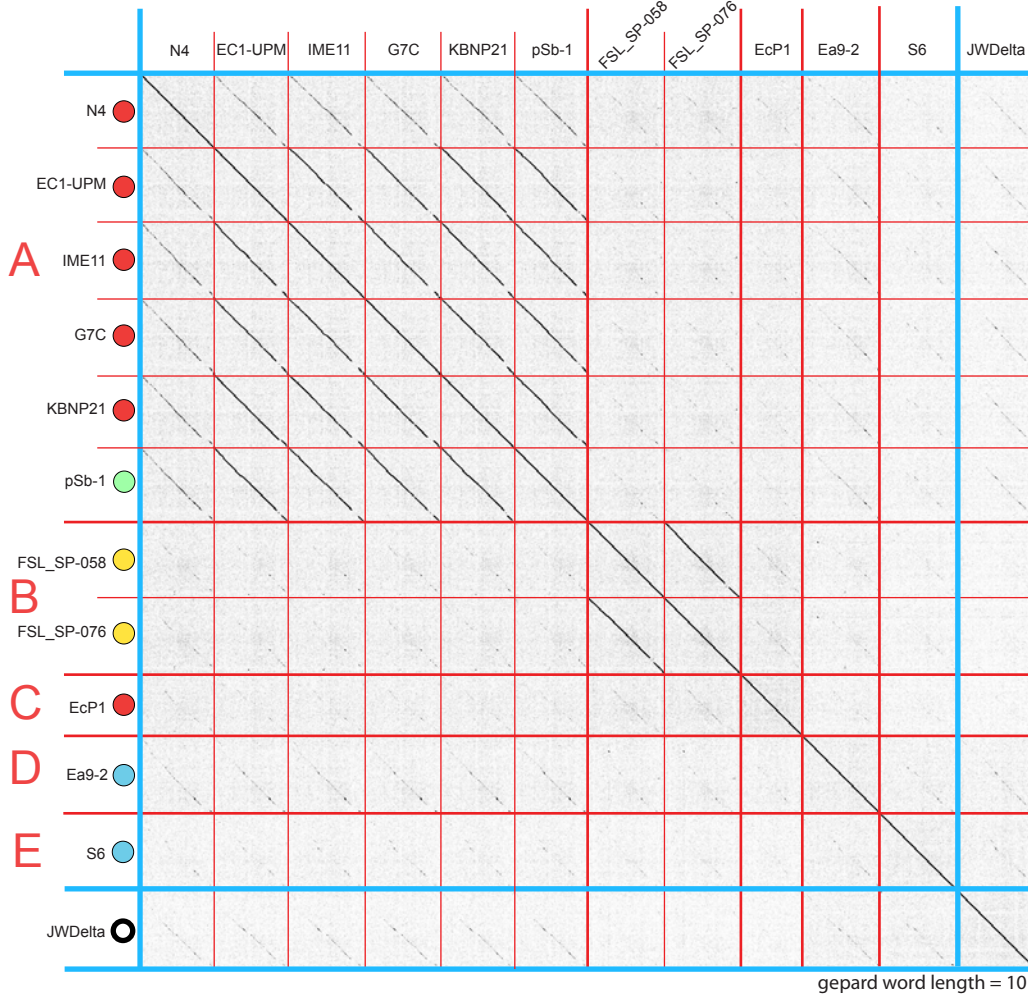

- *Erwinia*
- *Escherichia*
- *Salmonella*
- *Shigella*
- Outside the *Enterobacteriaceae* *Achromobacter*

## MCPs

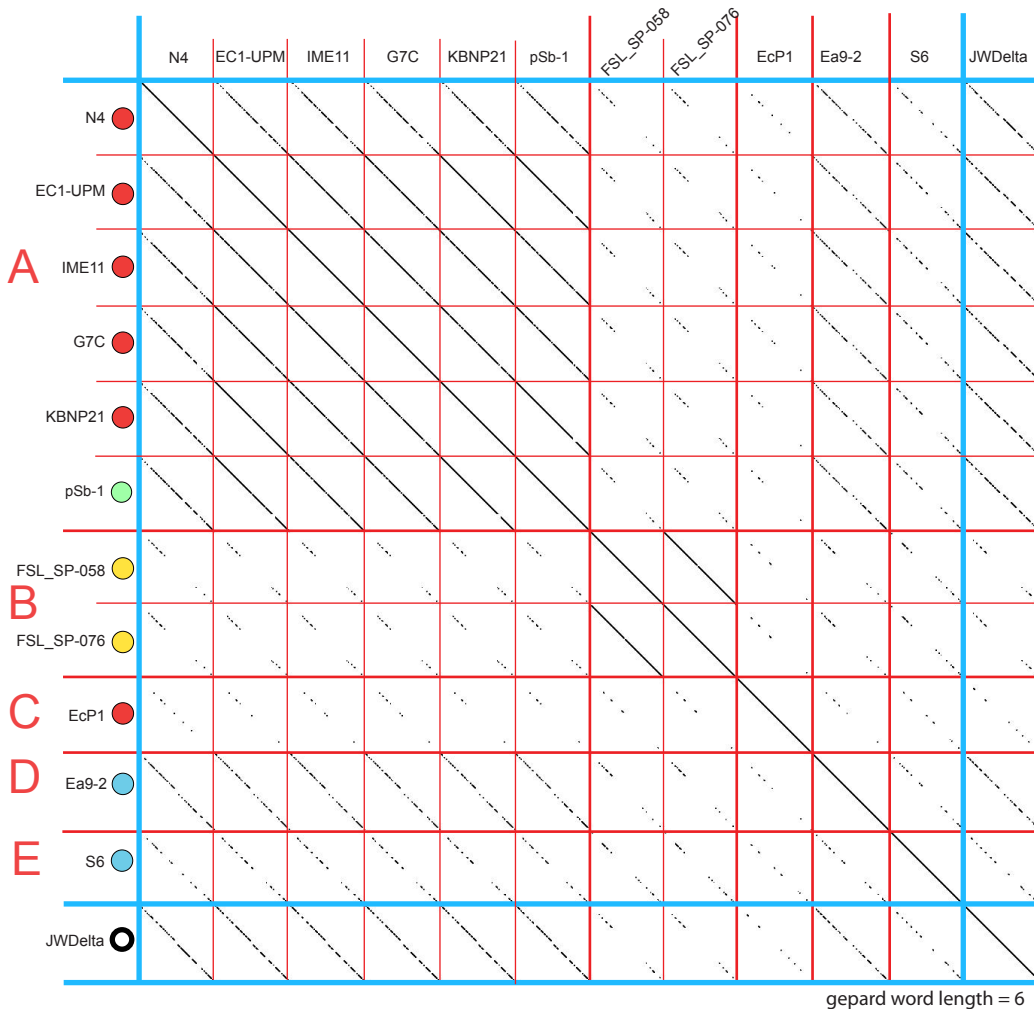

# Chi-like Cluster

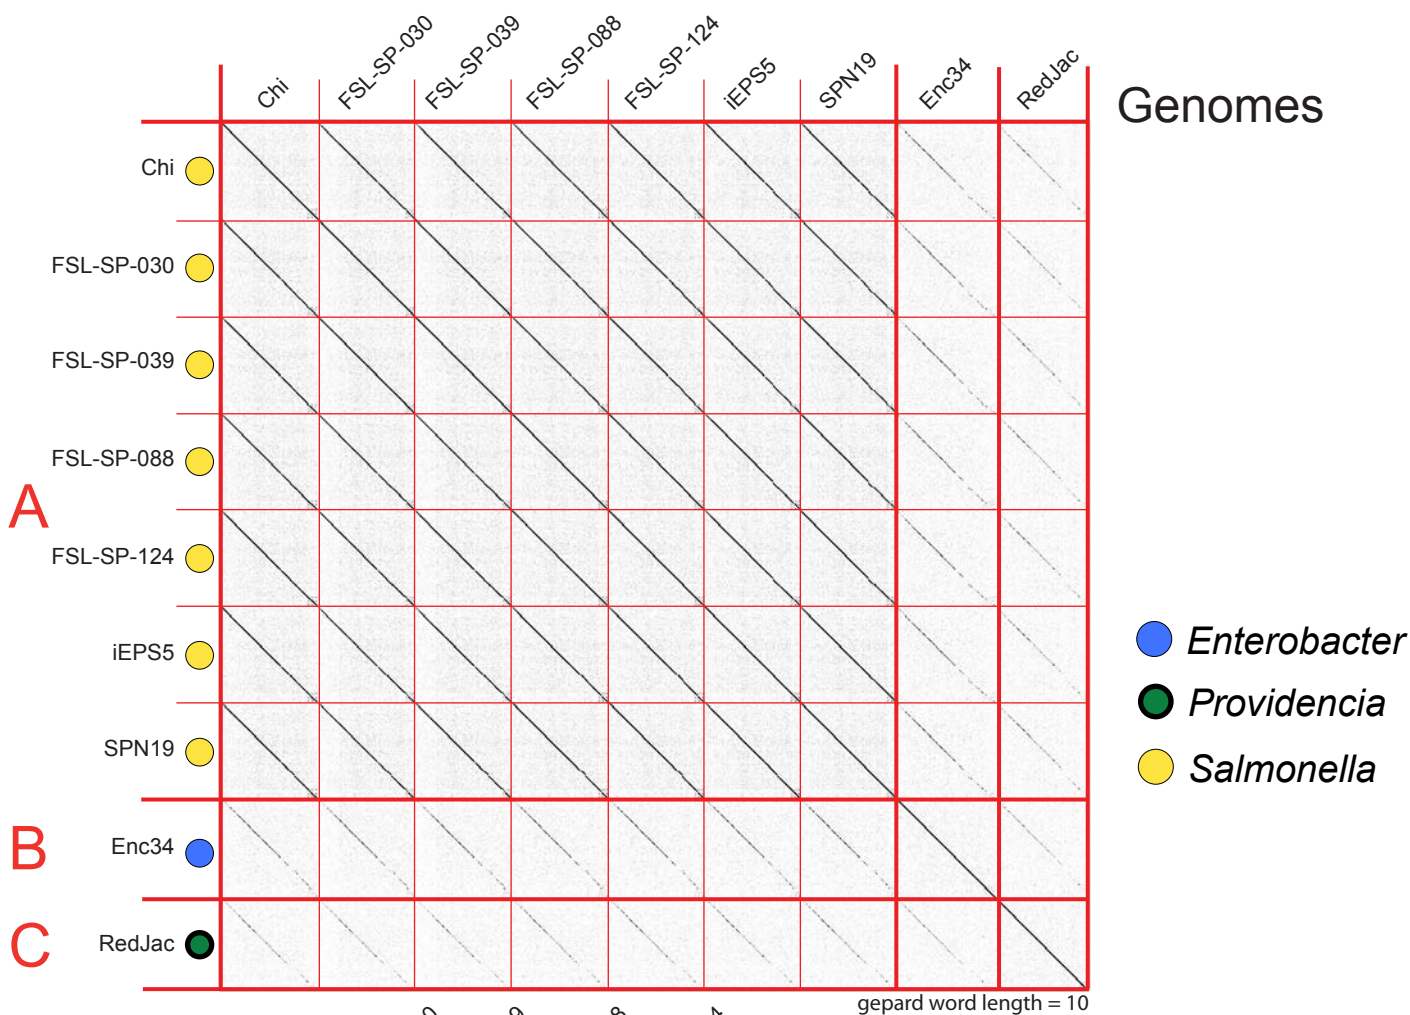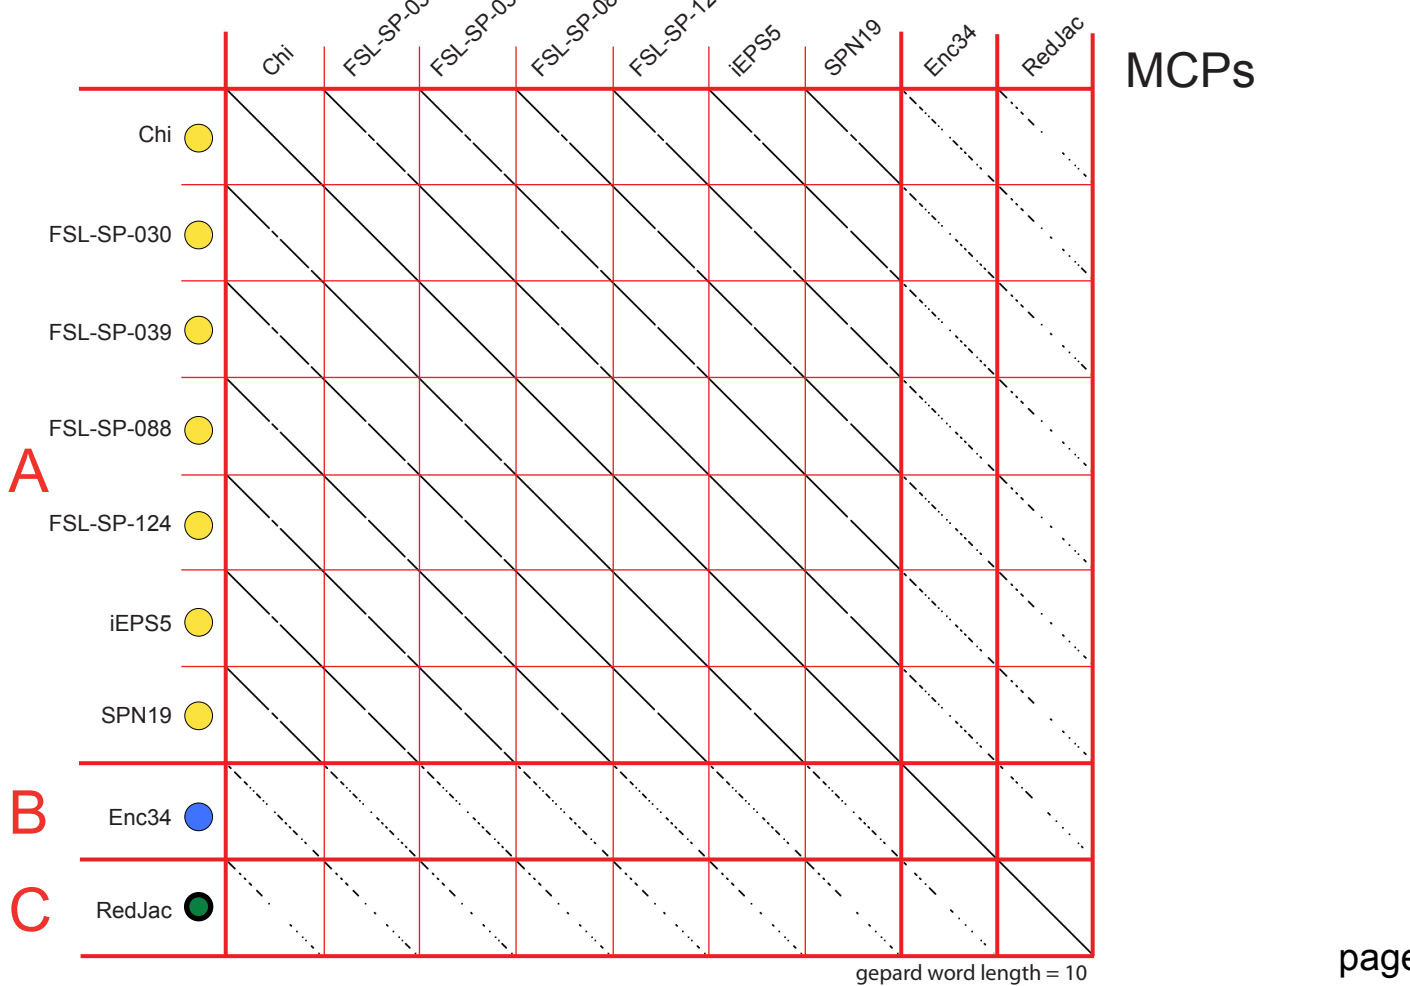

# øEco32-like Cluster

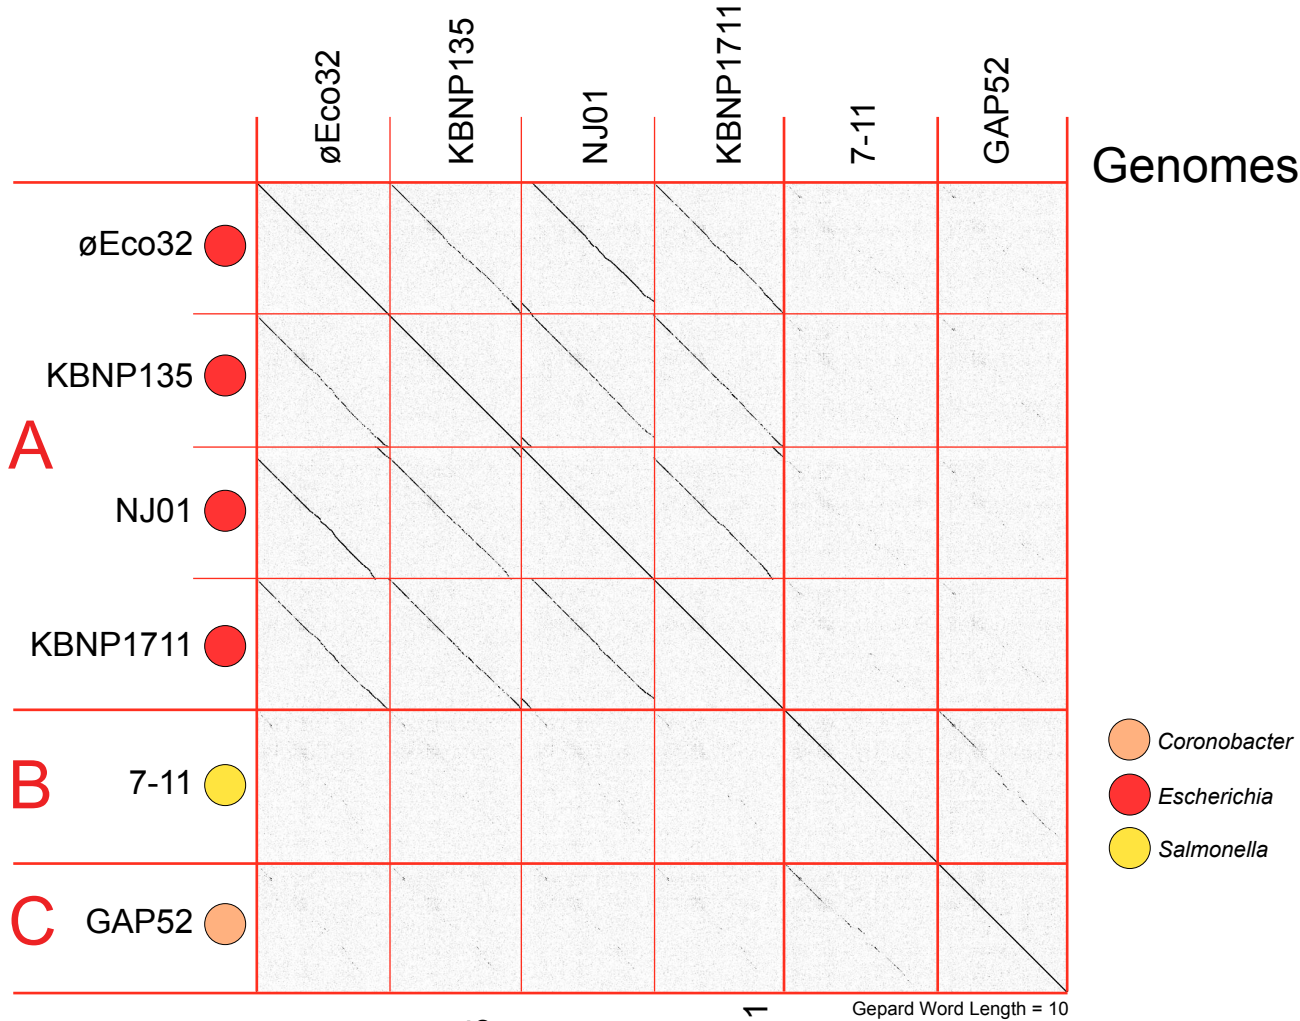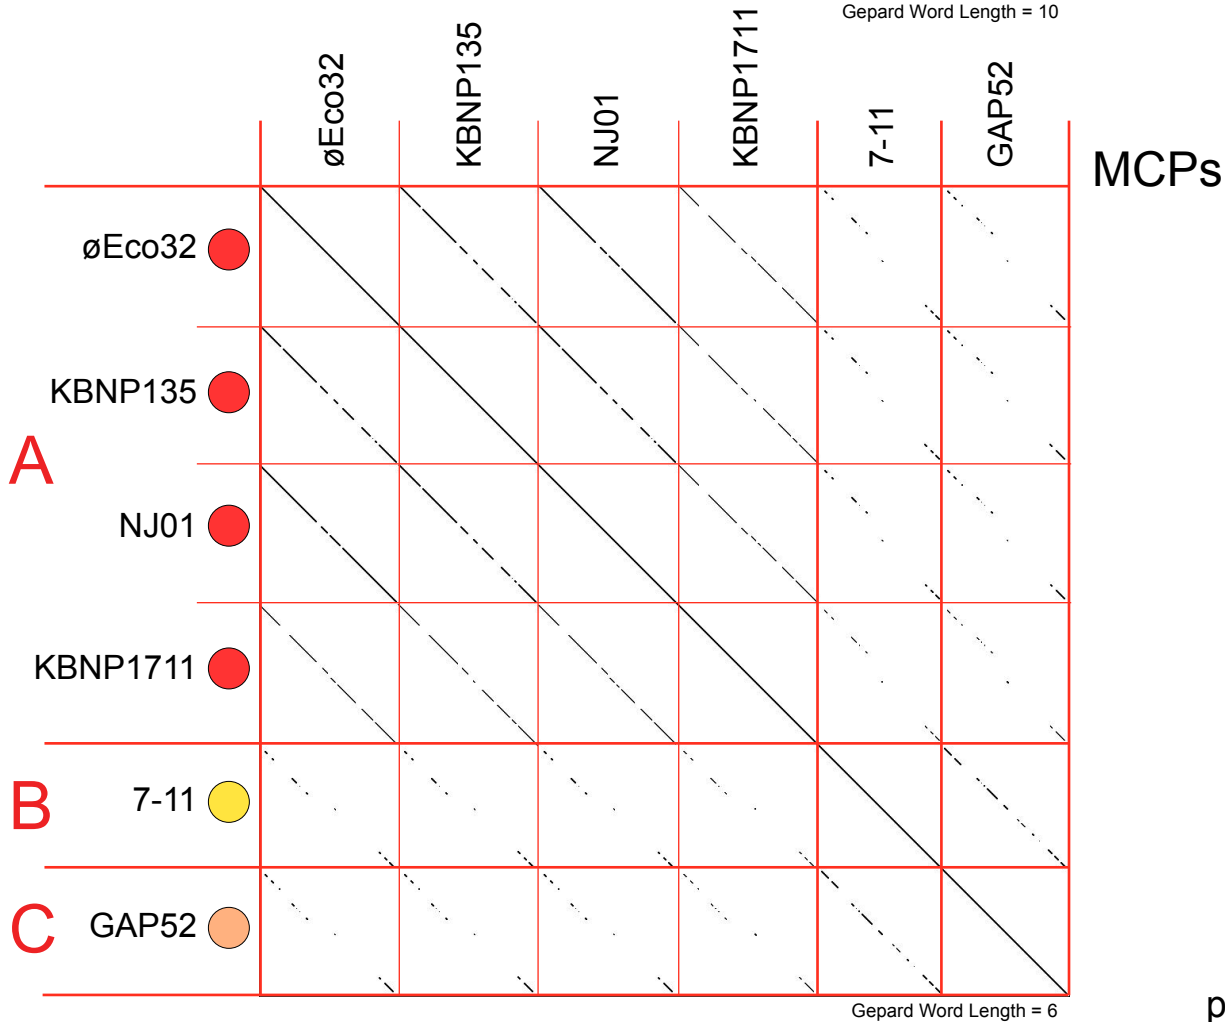



Felix O1-like  
Cluster  
MCPs

- *Erwinia*
- *Escherichia*
- *Salmonella*

\* genome not completely sequenced

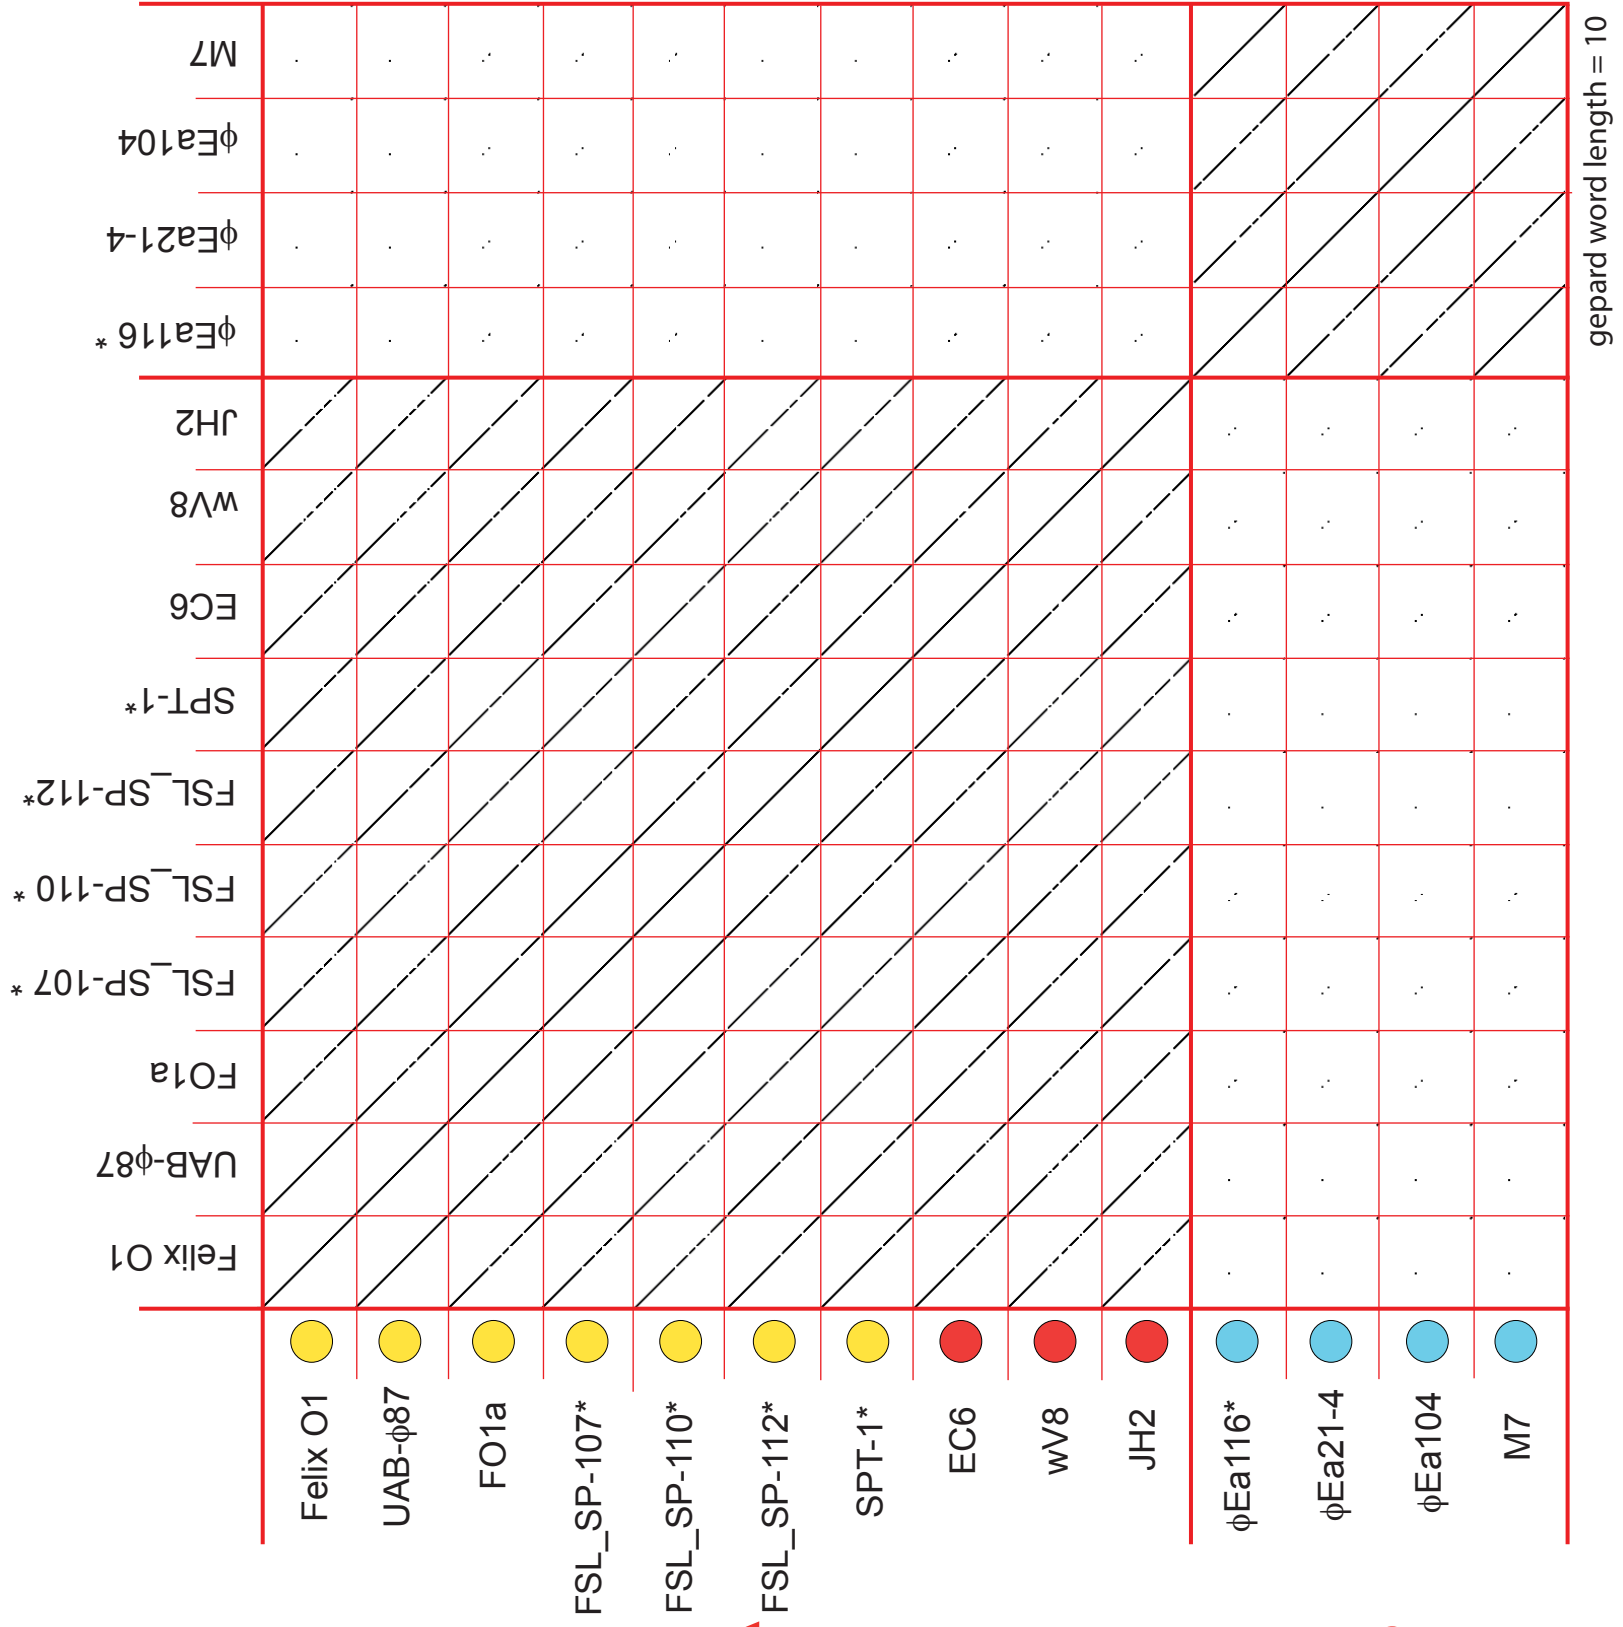

gepard word length = 10

**A**

**B**

# SETP3-like and SO-1-like Clusters

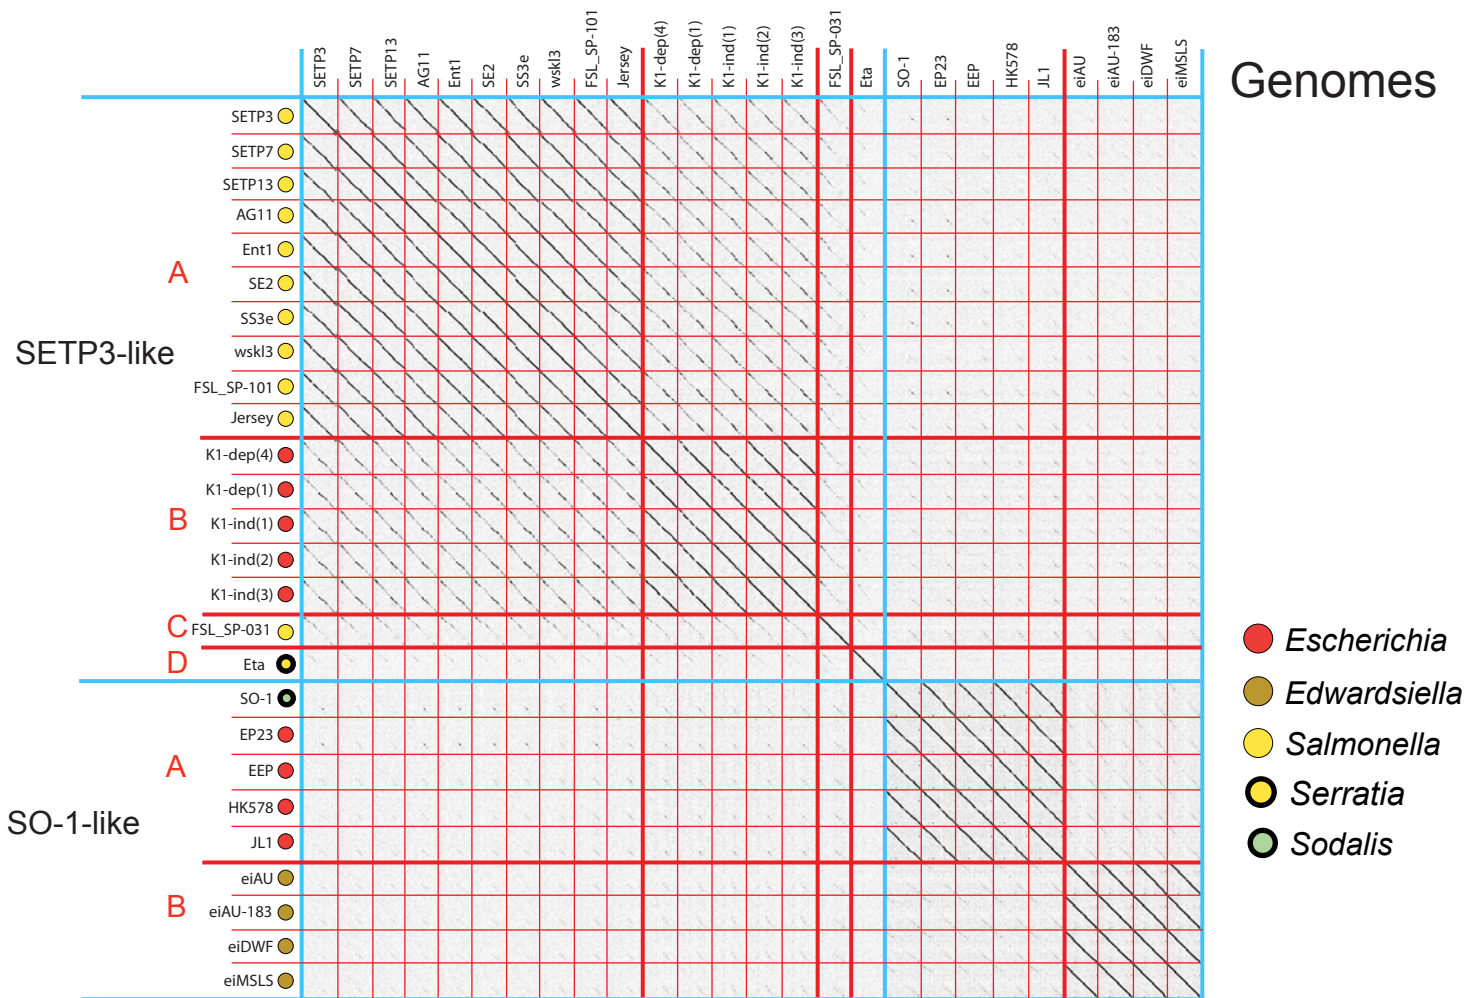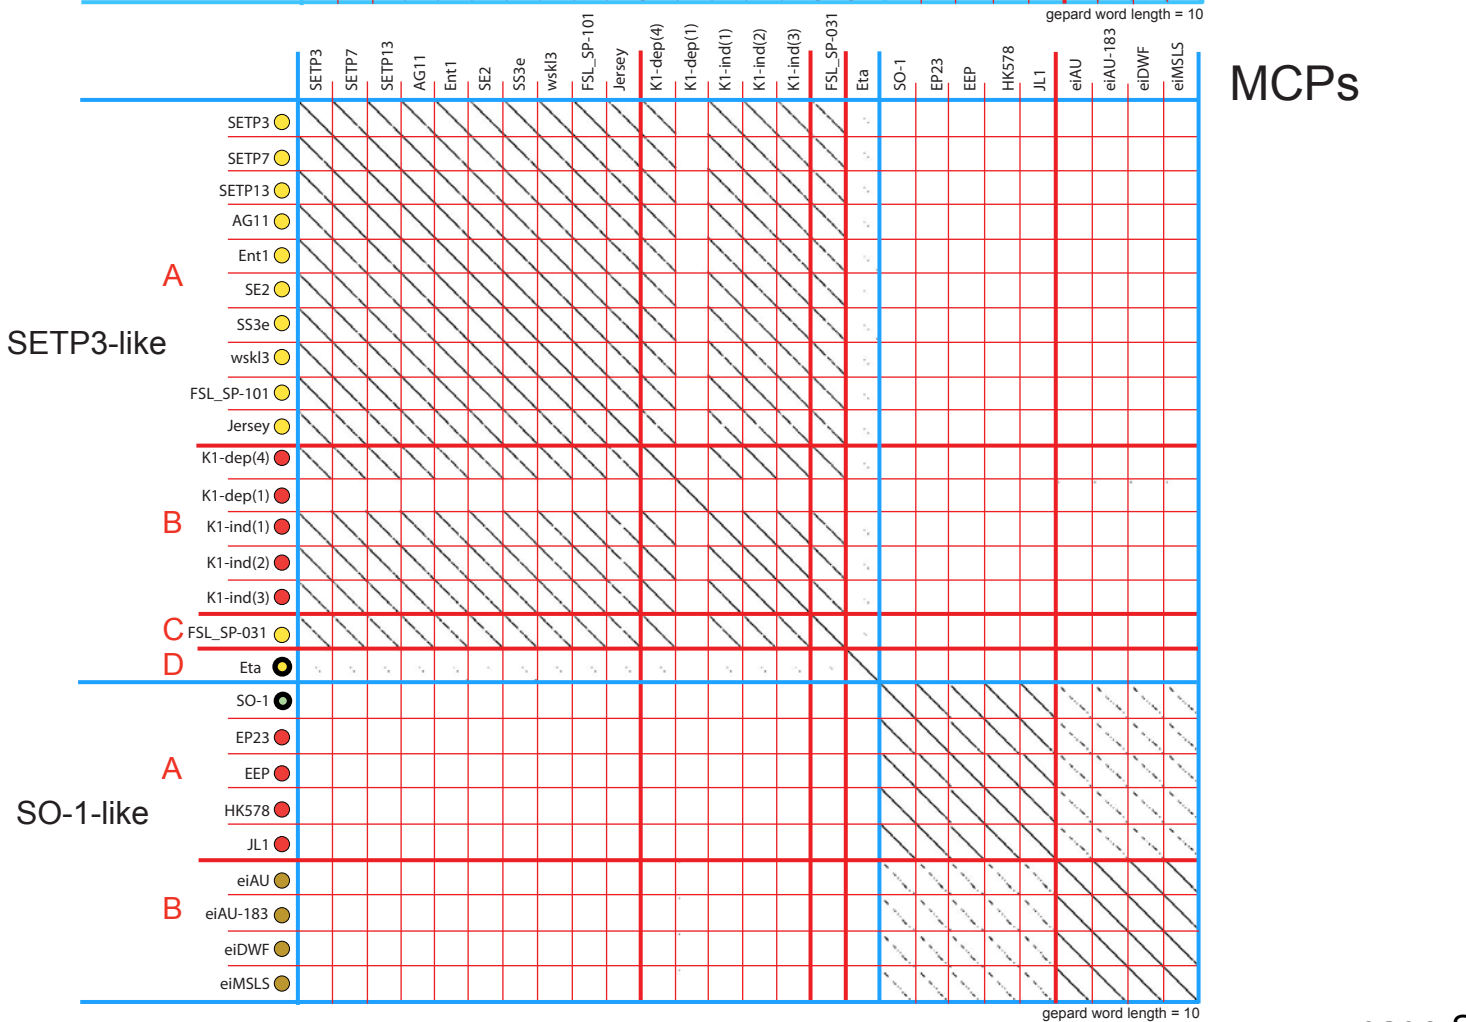

# Seven Large Lytic Clusters

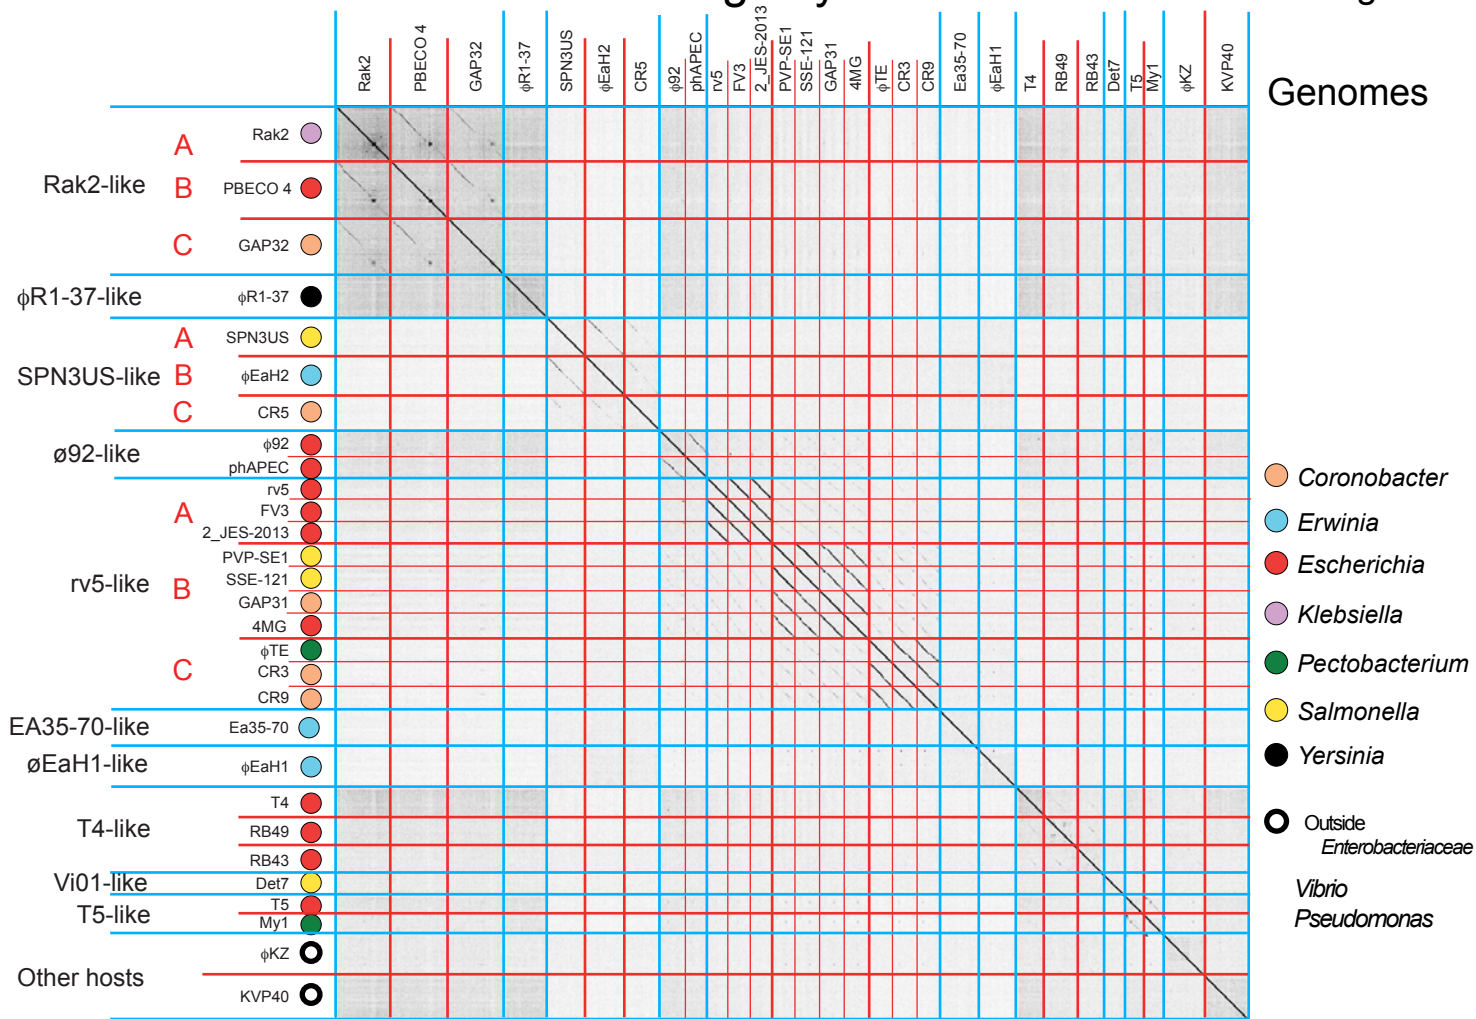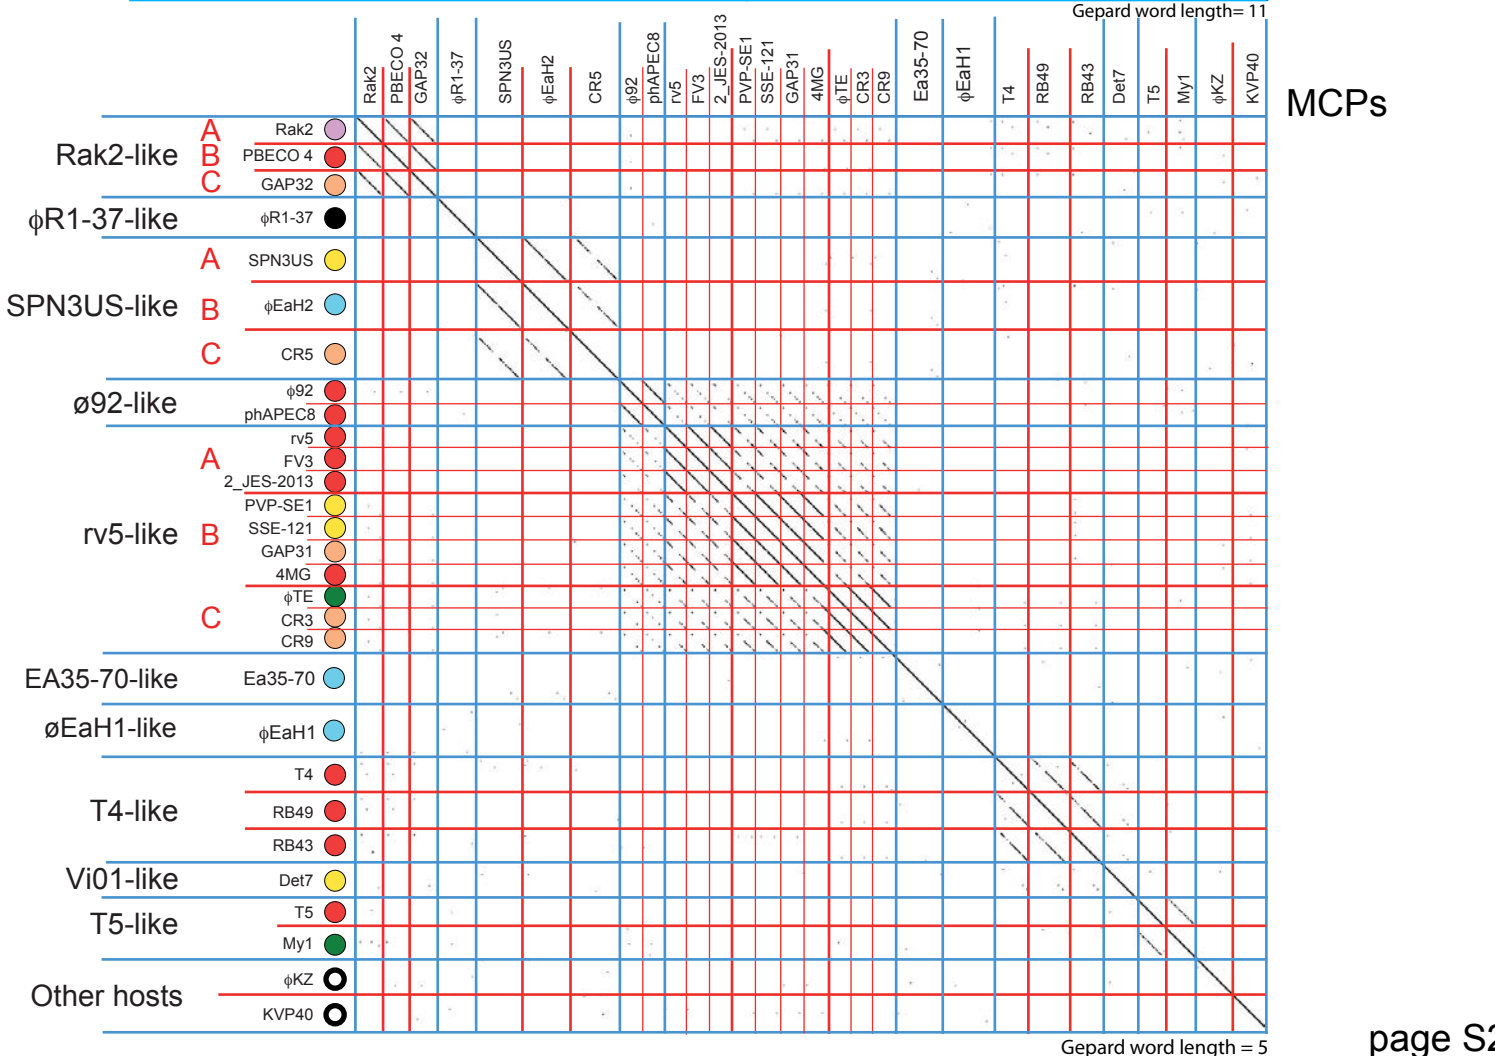

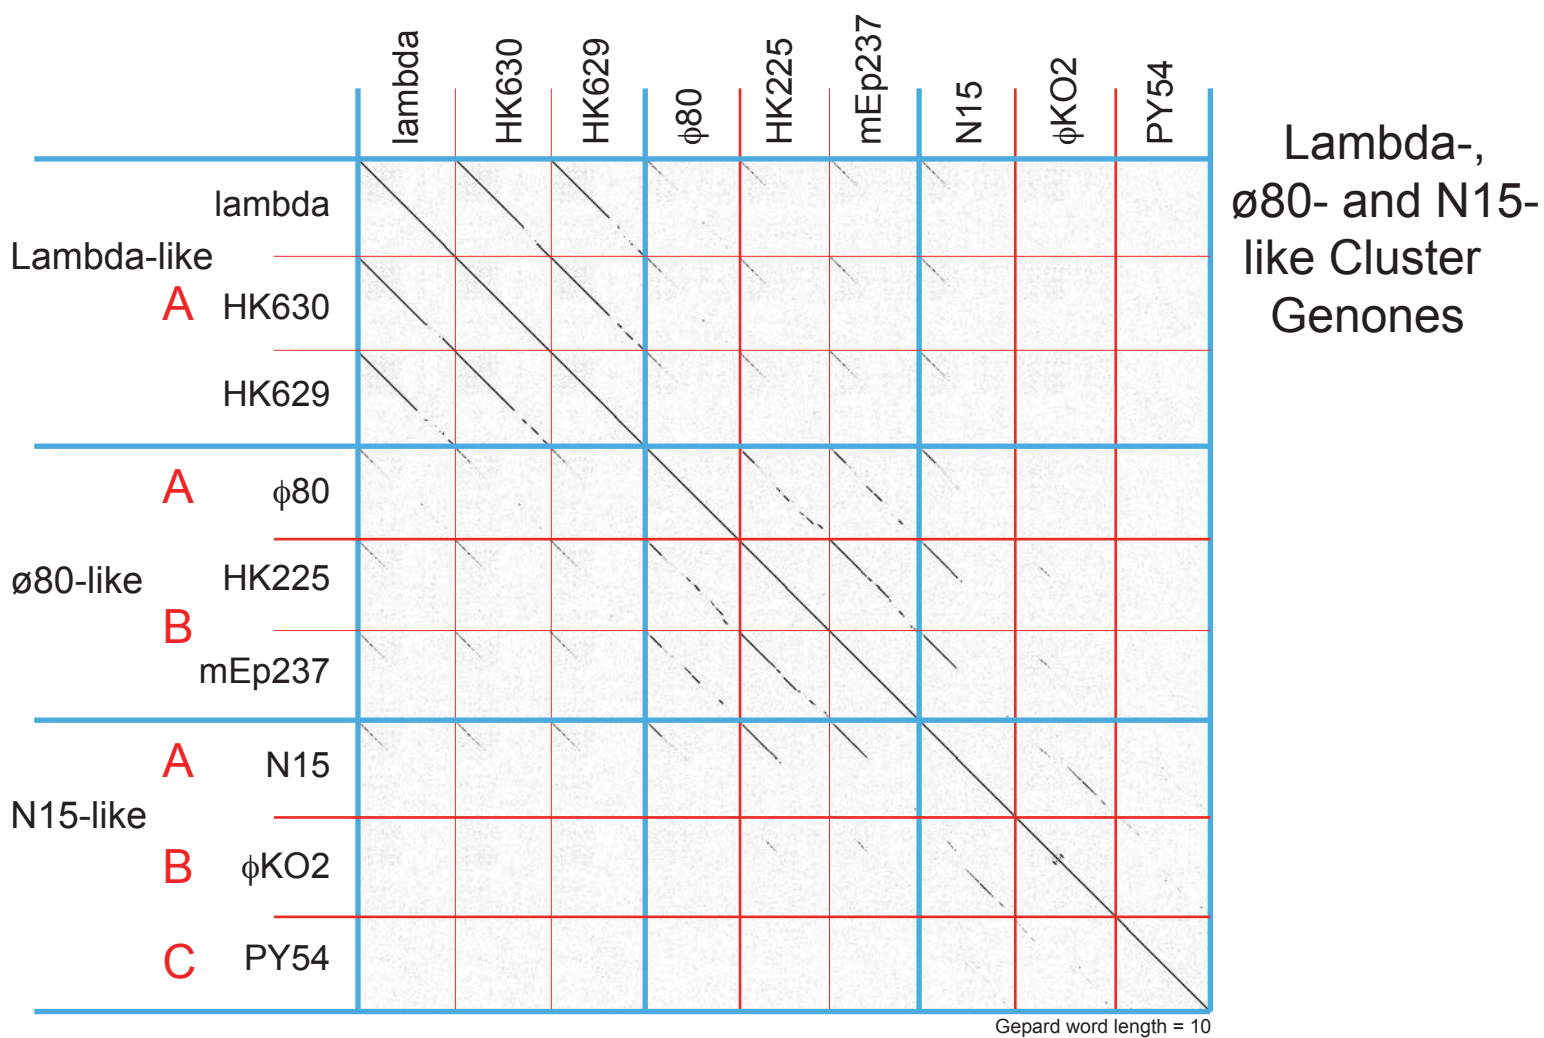

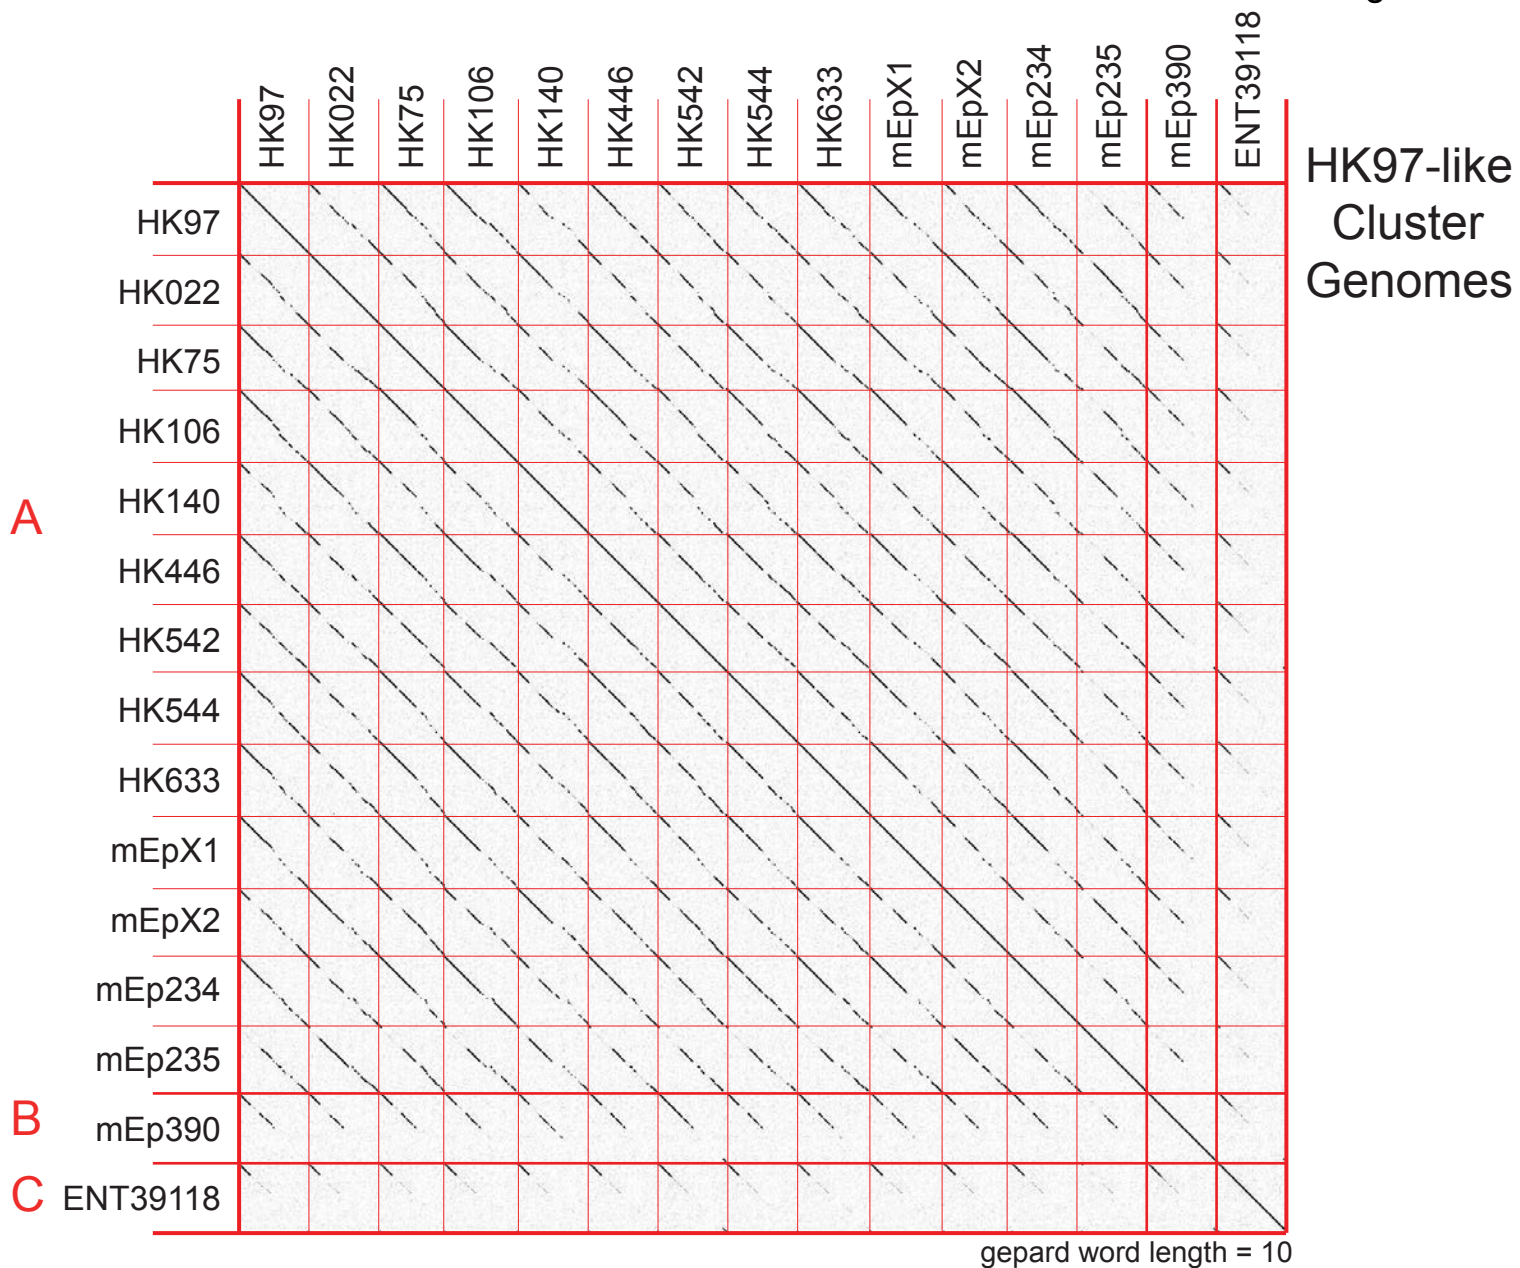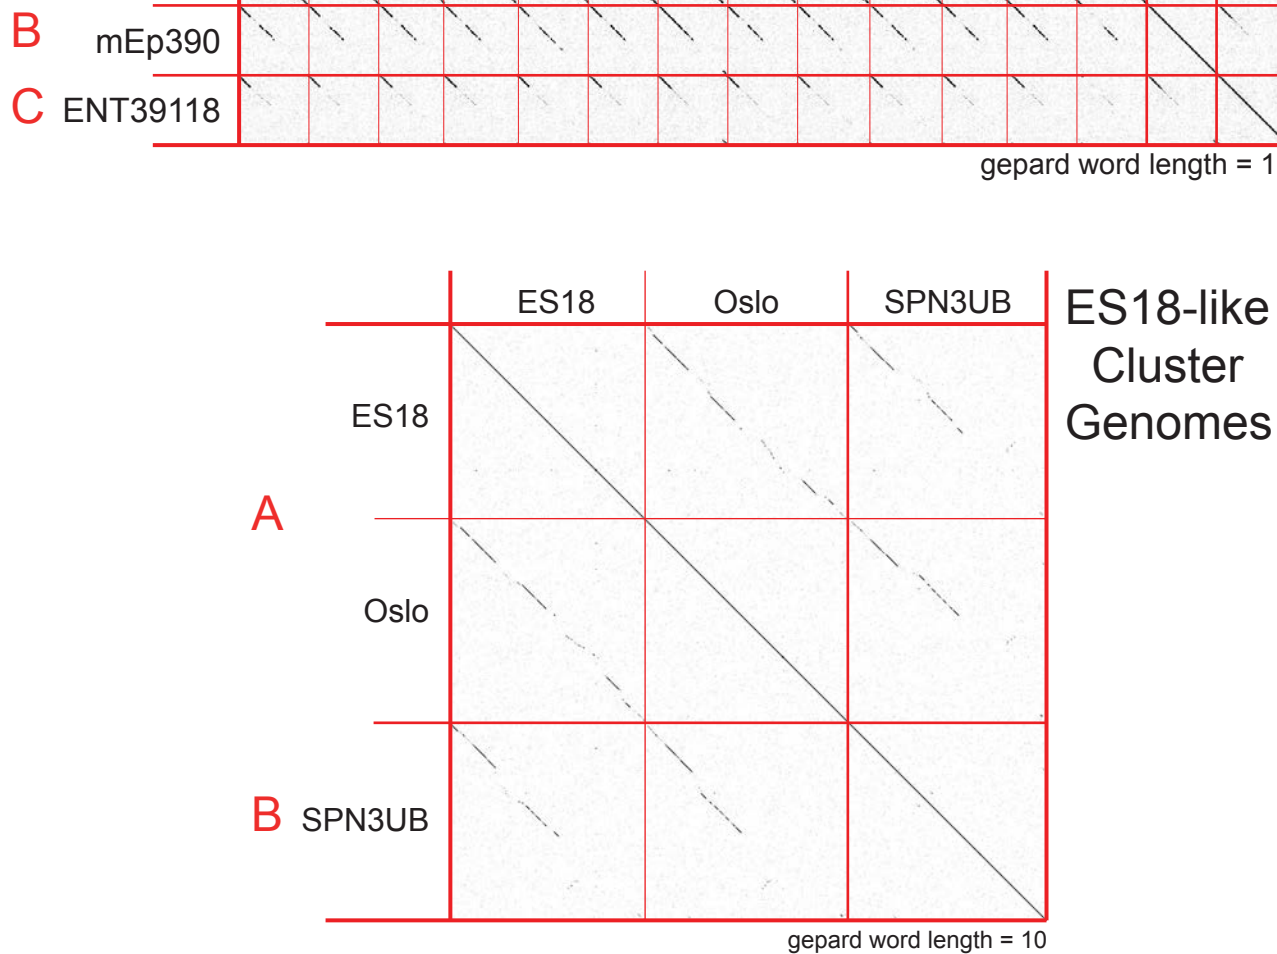

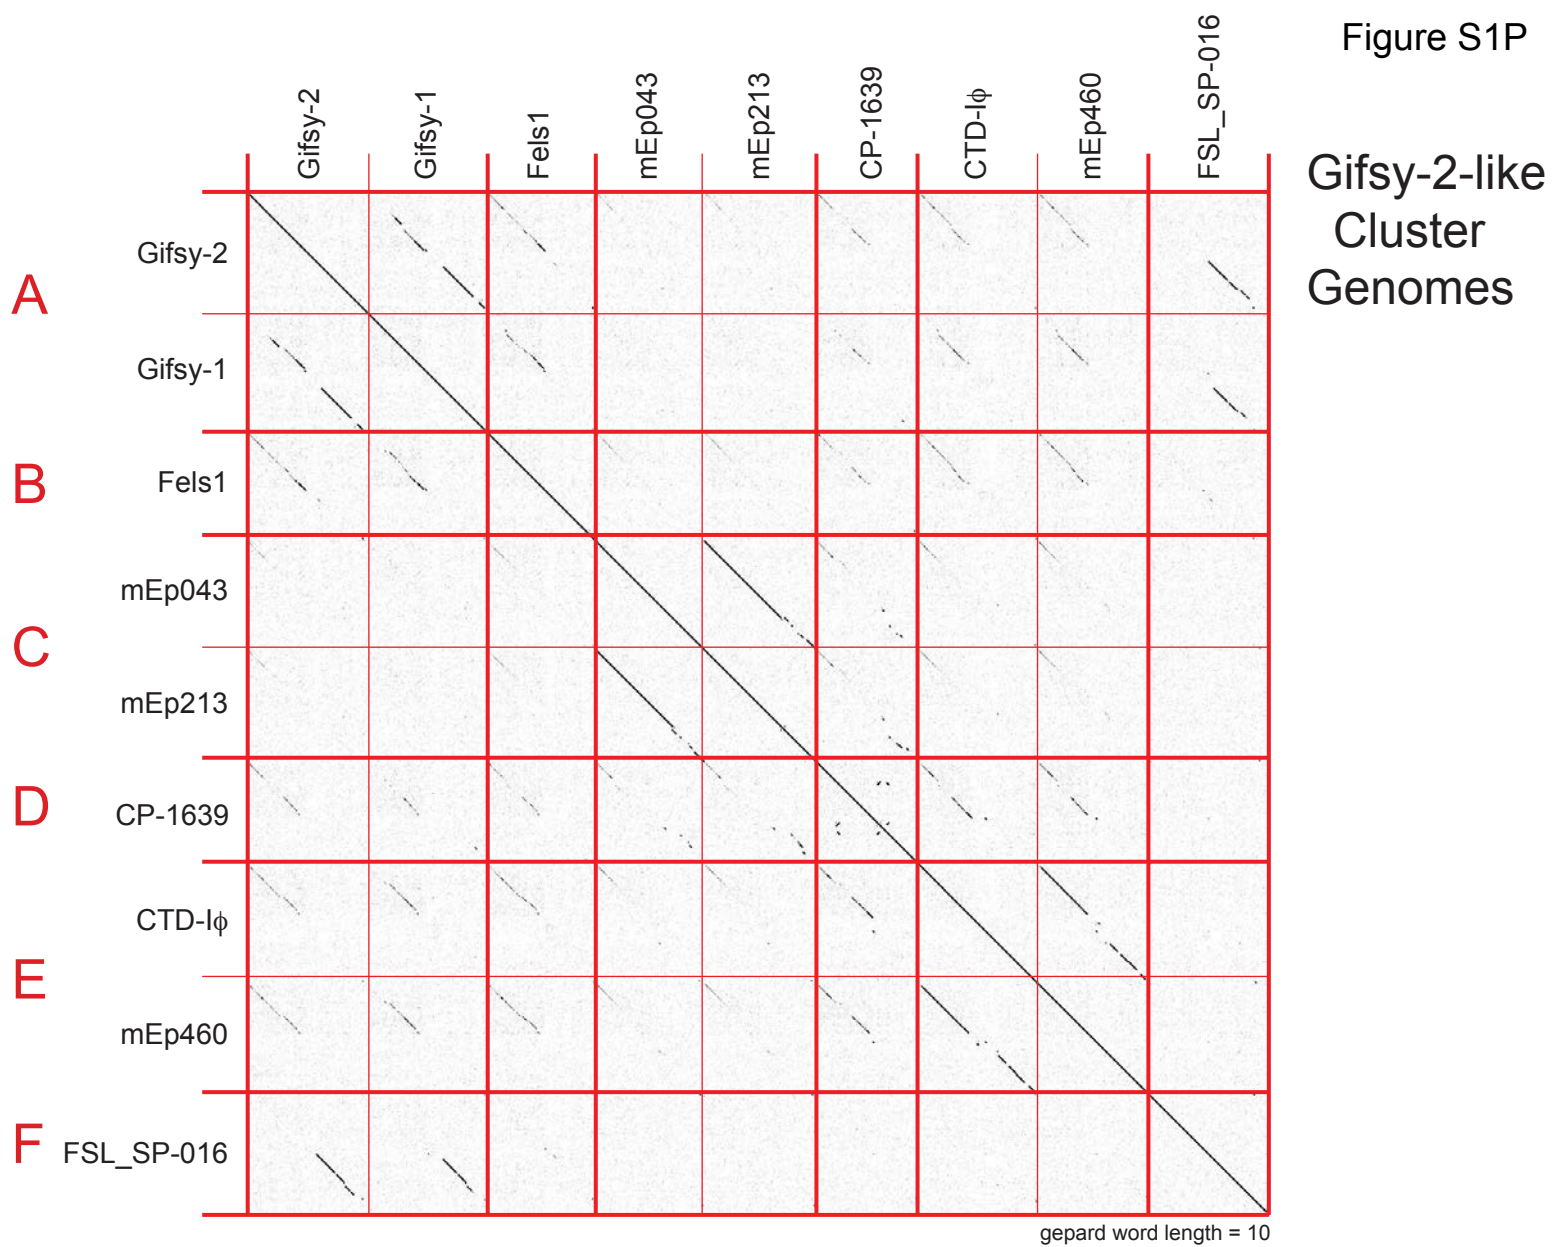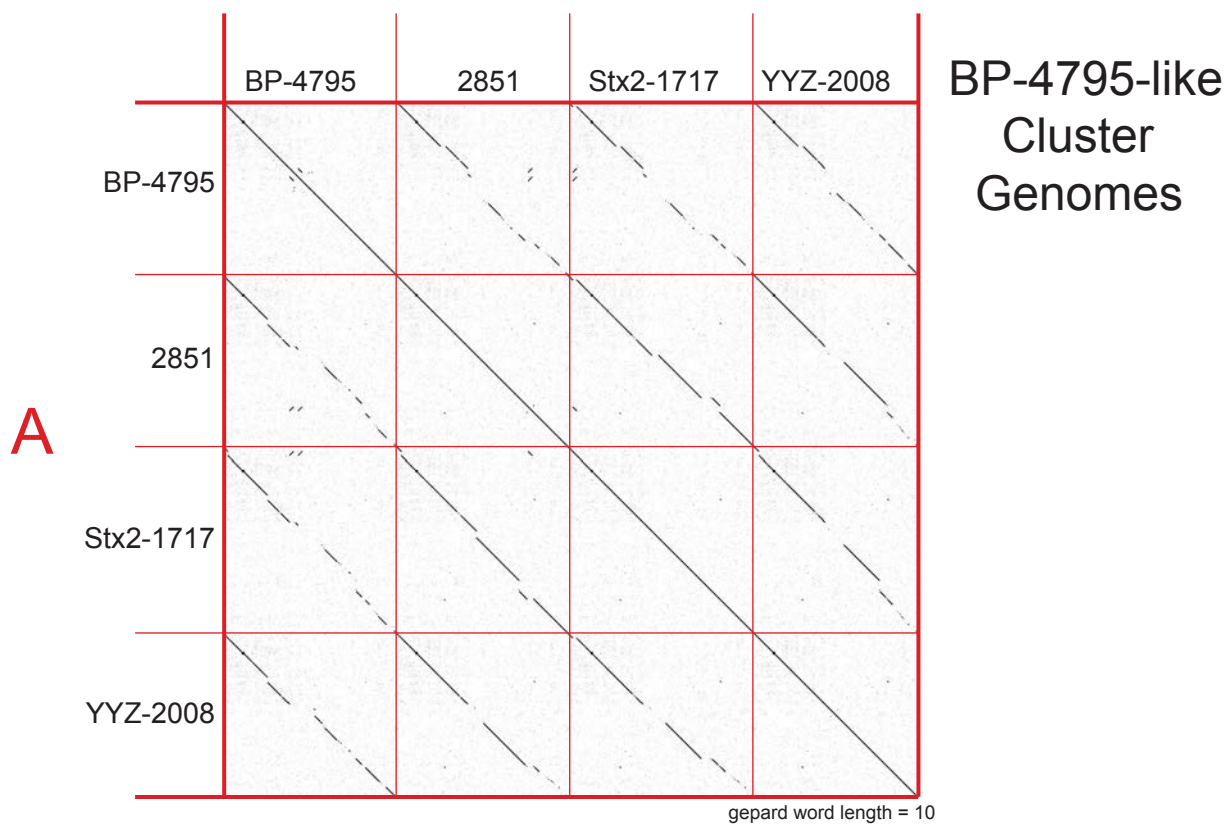

### P22- and APSE-1-like Cluster Genomes

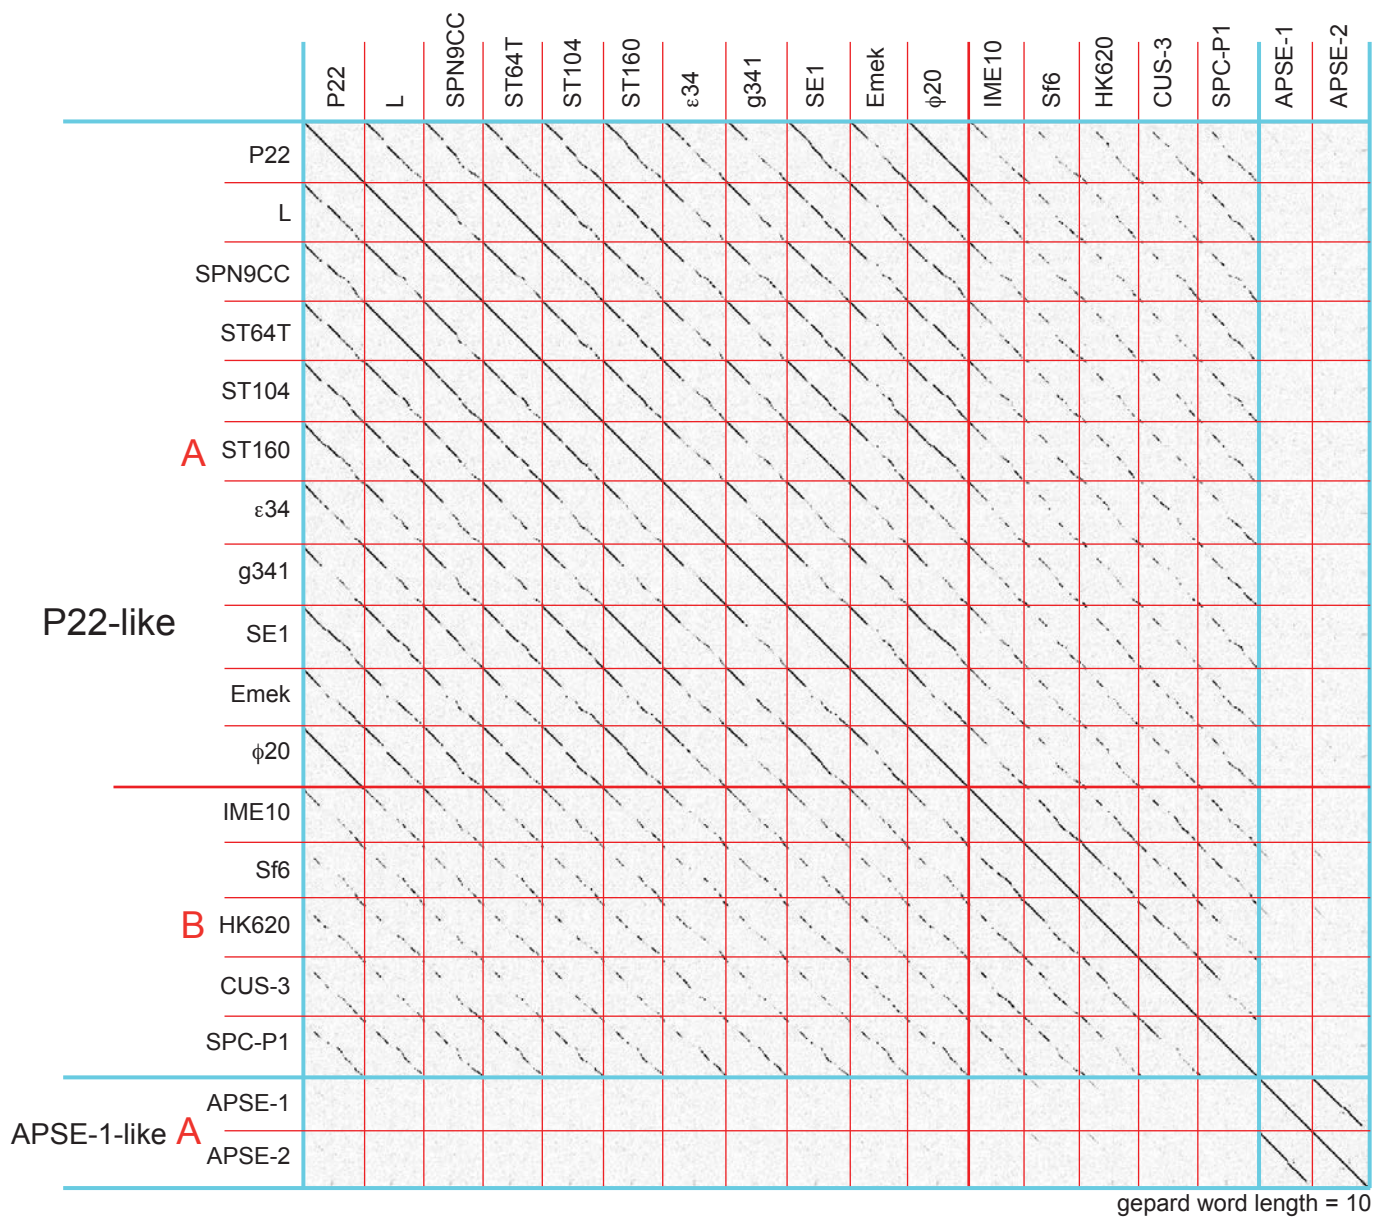

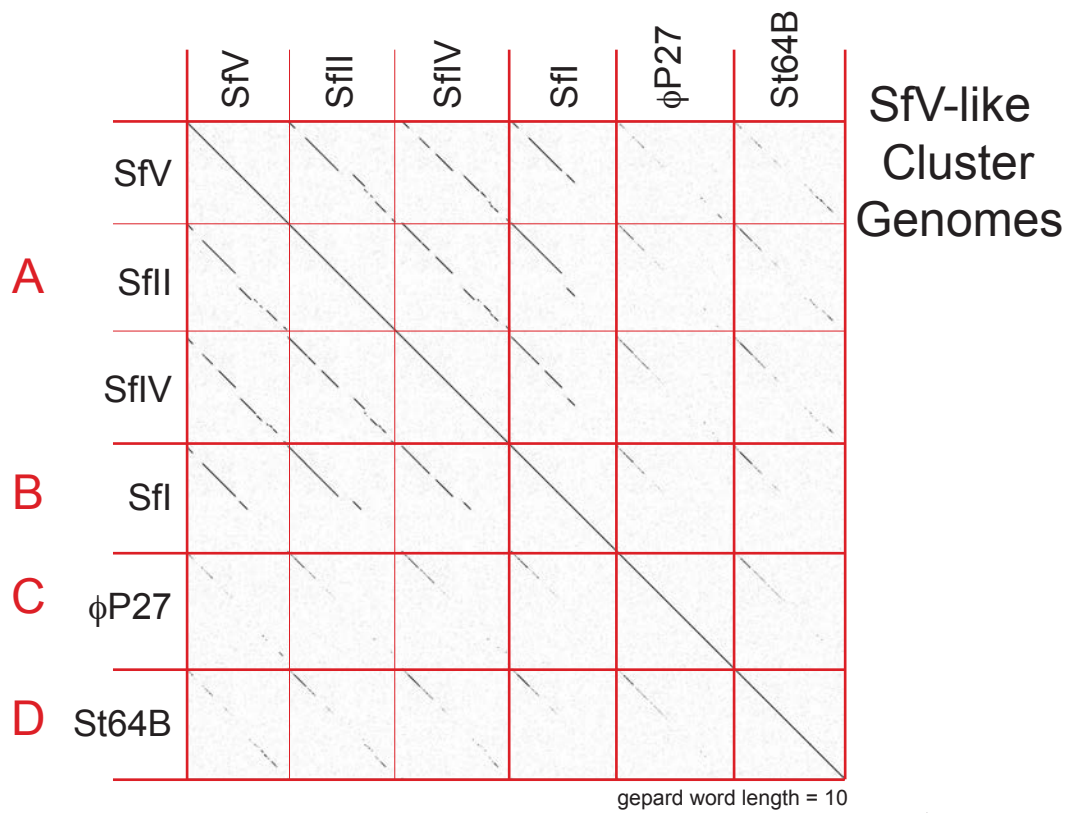

gepard word length = 10

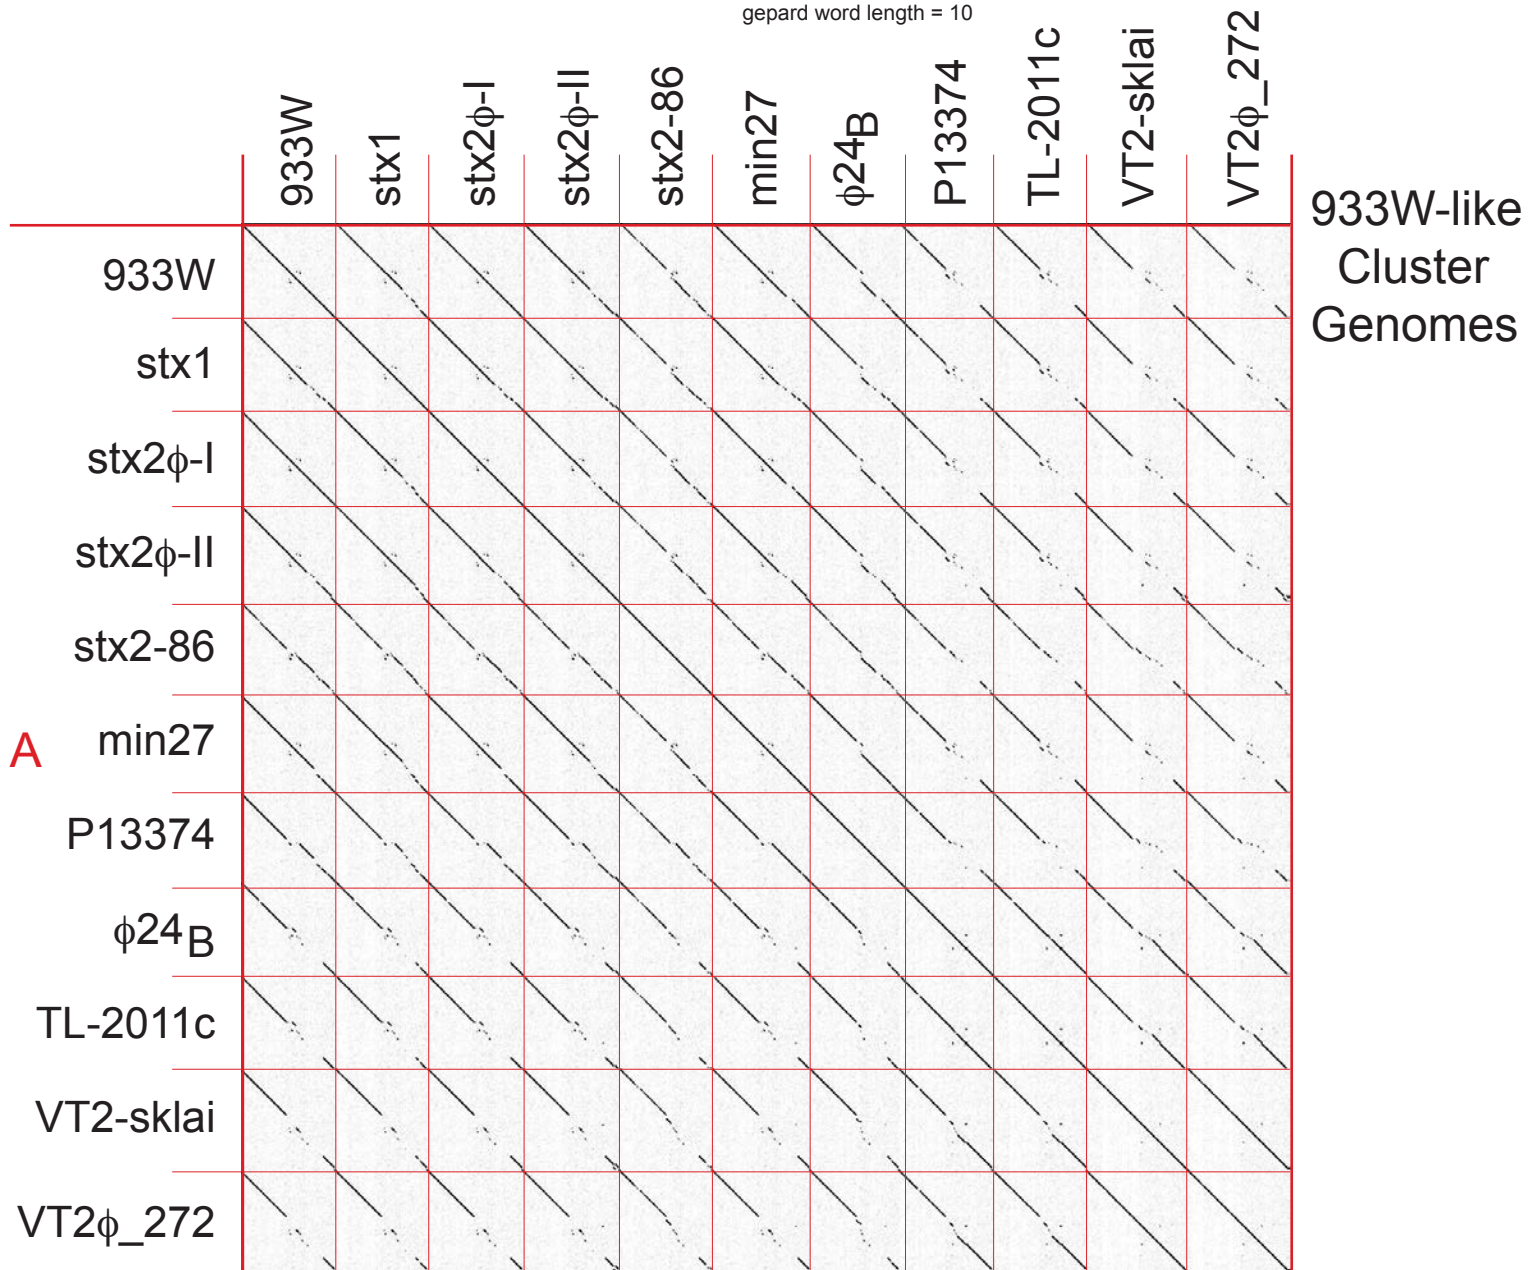

gepard word length = 10



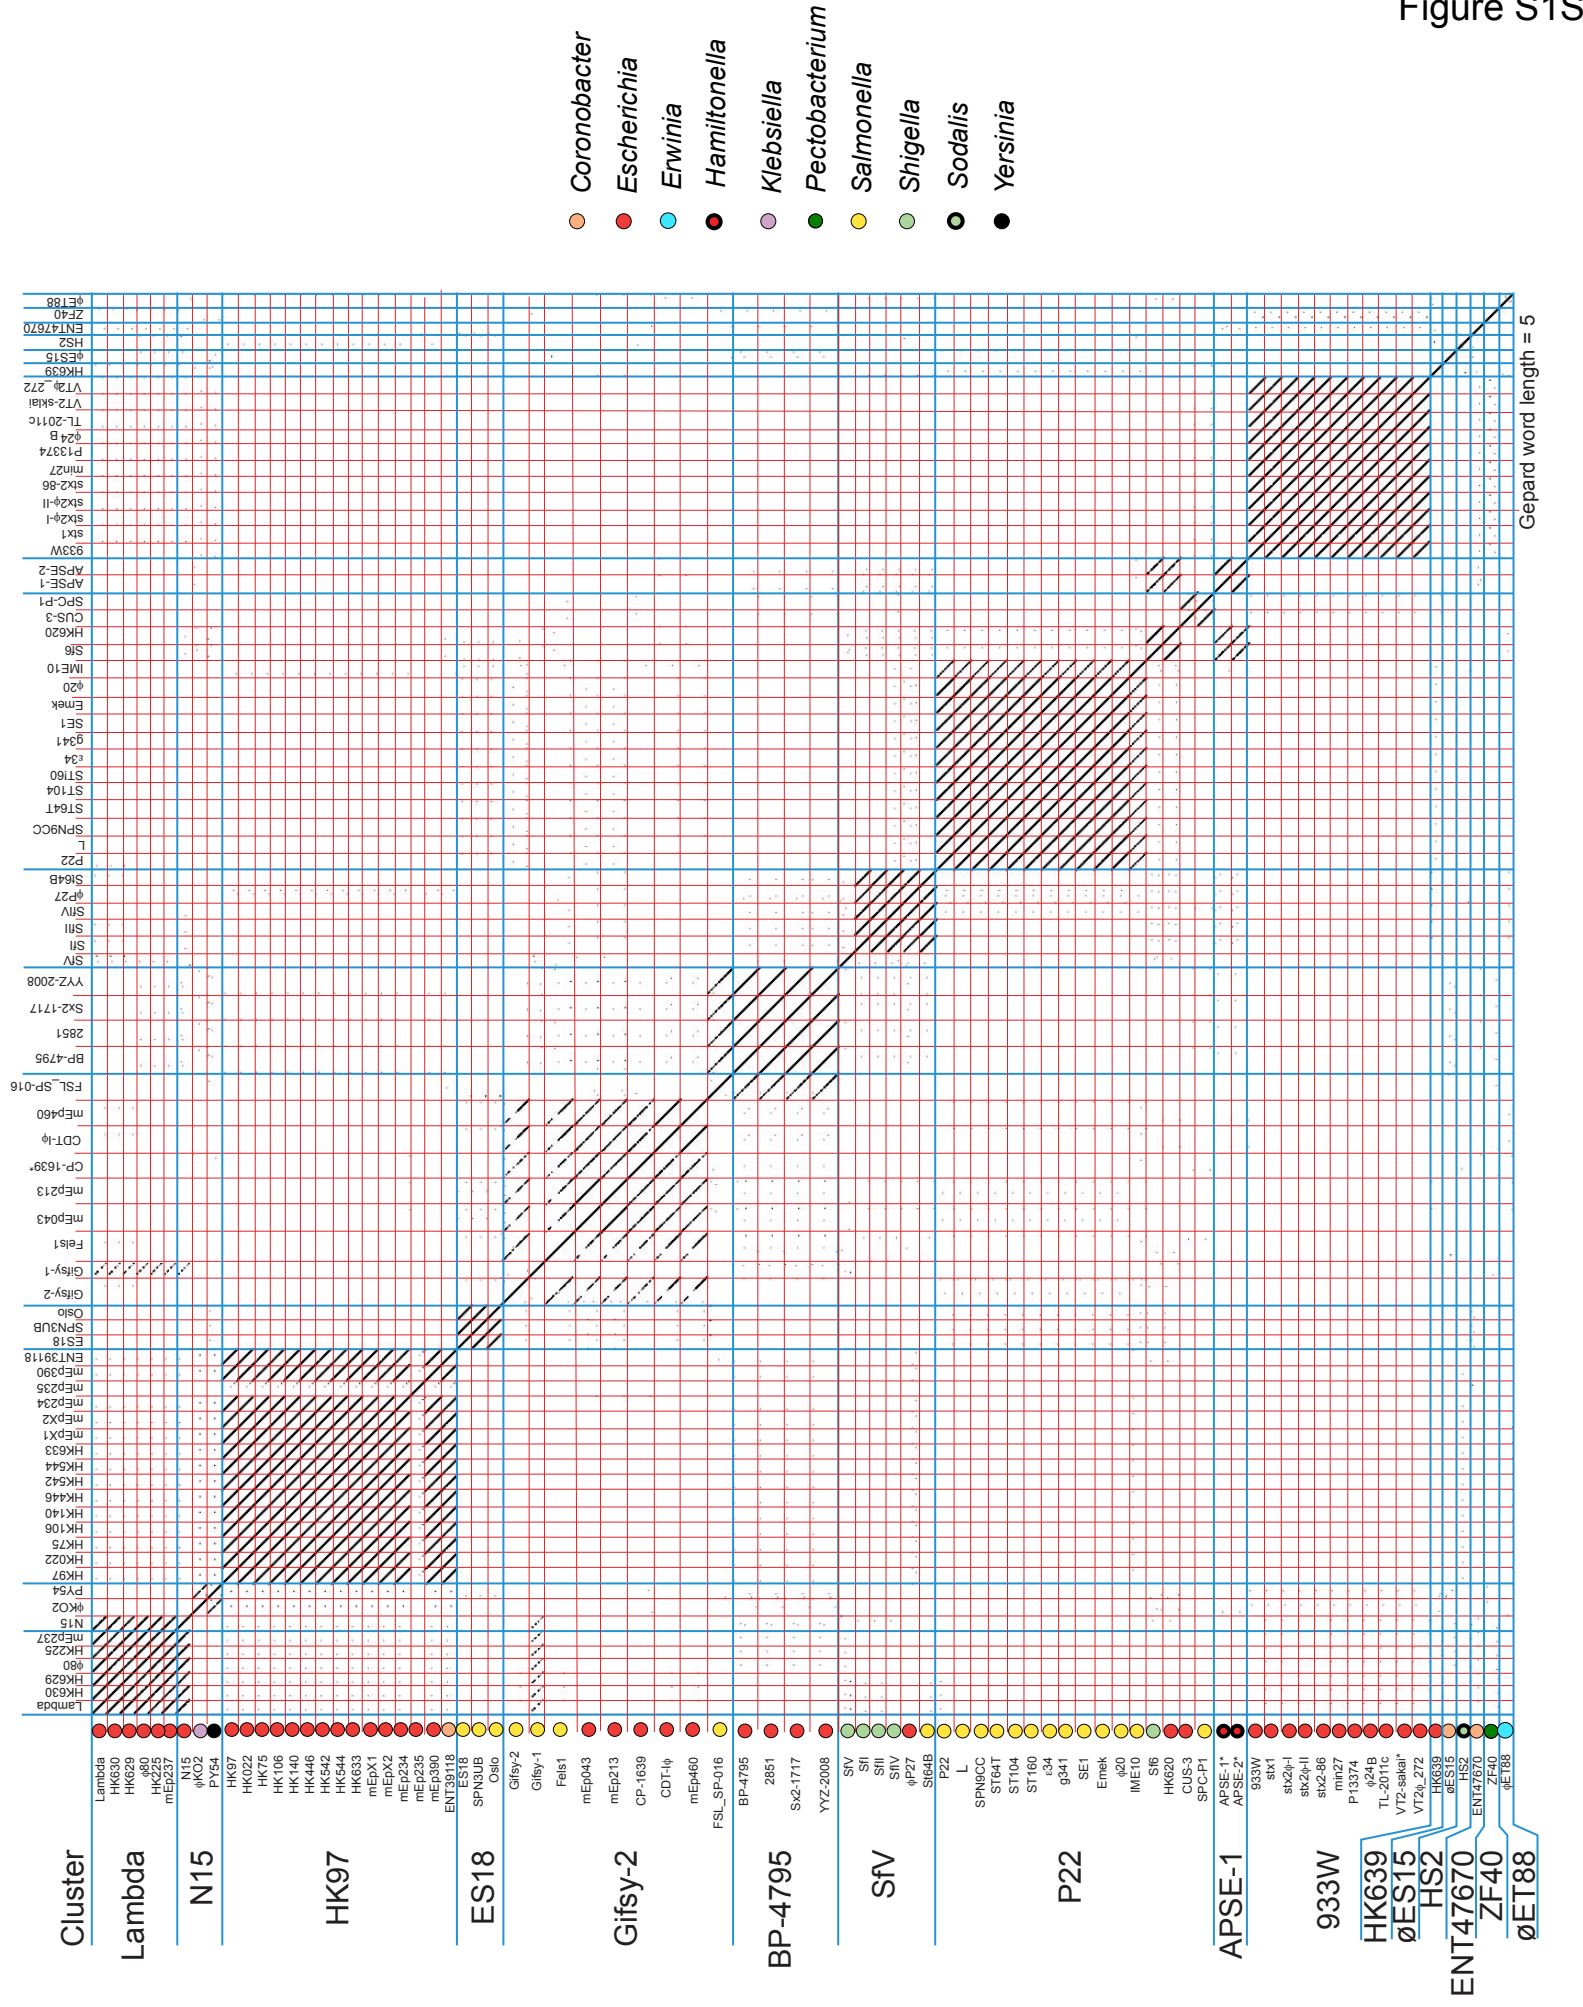

- *Coronobacter*
- *Escherichia*
- *Erwinia*
- *Hamiltonella*
- *Klebsiella*
- *Pectobacterium*
- *Salmonella*
- *Shigella*
- *Sodalis*
- *Yersinia*

Gepard word length = 5

$\epsilon$ 15-like Cluster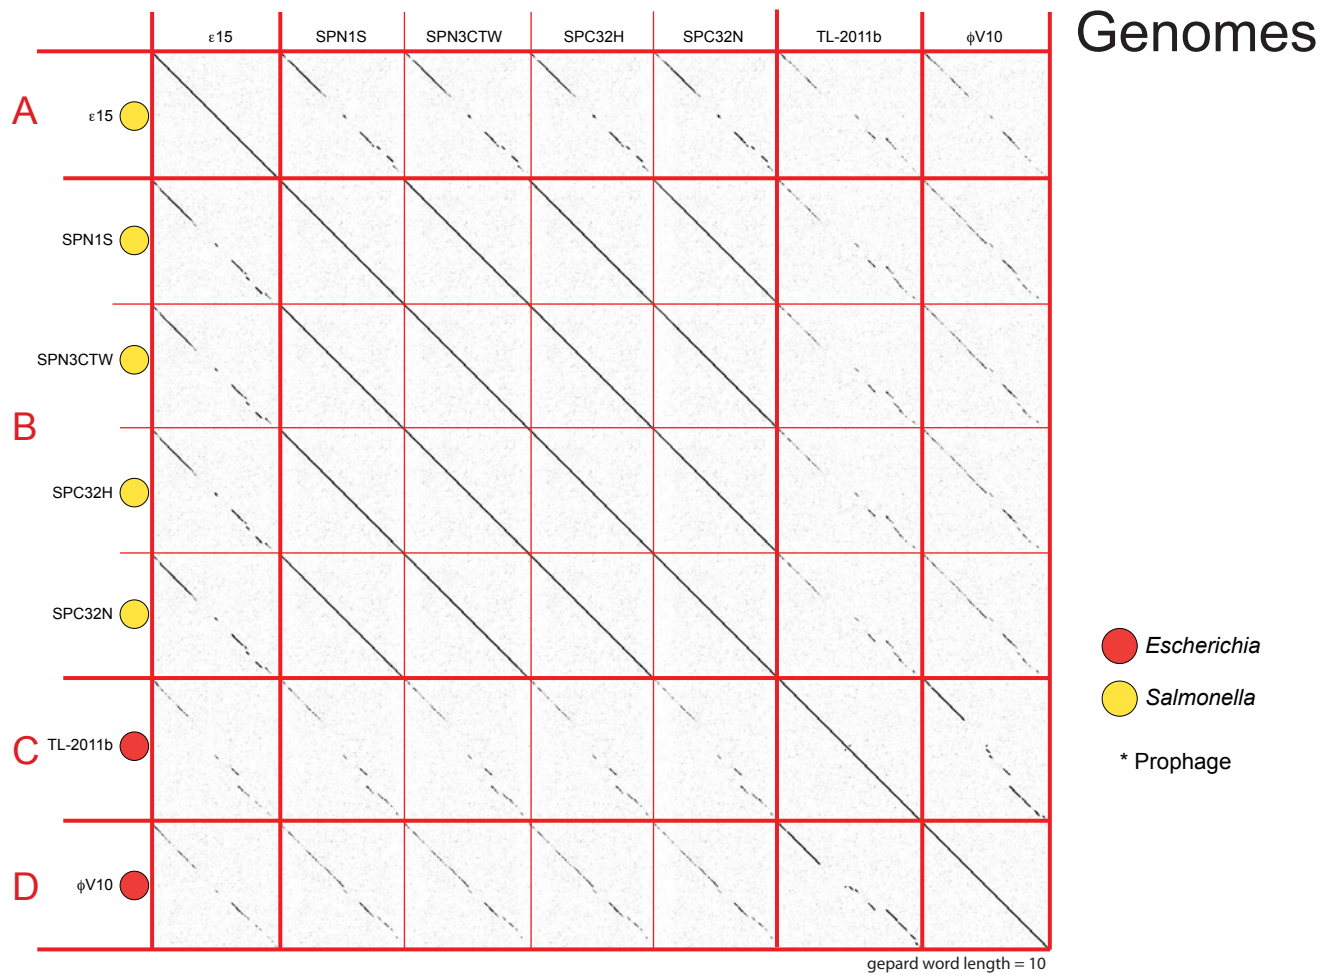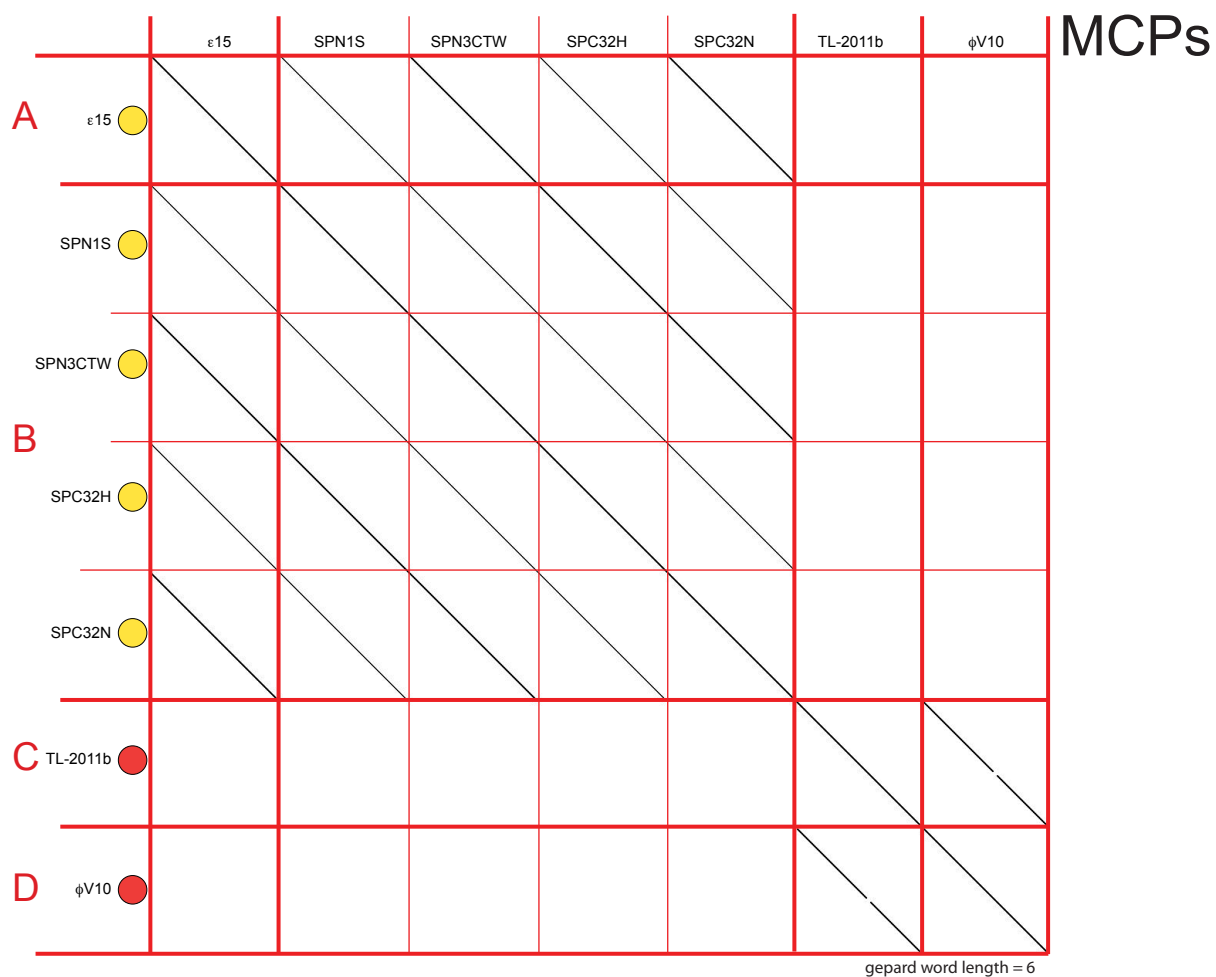

# P1 and SSU5-like Clusters

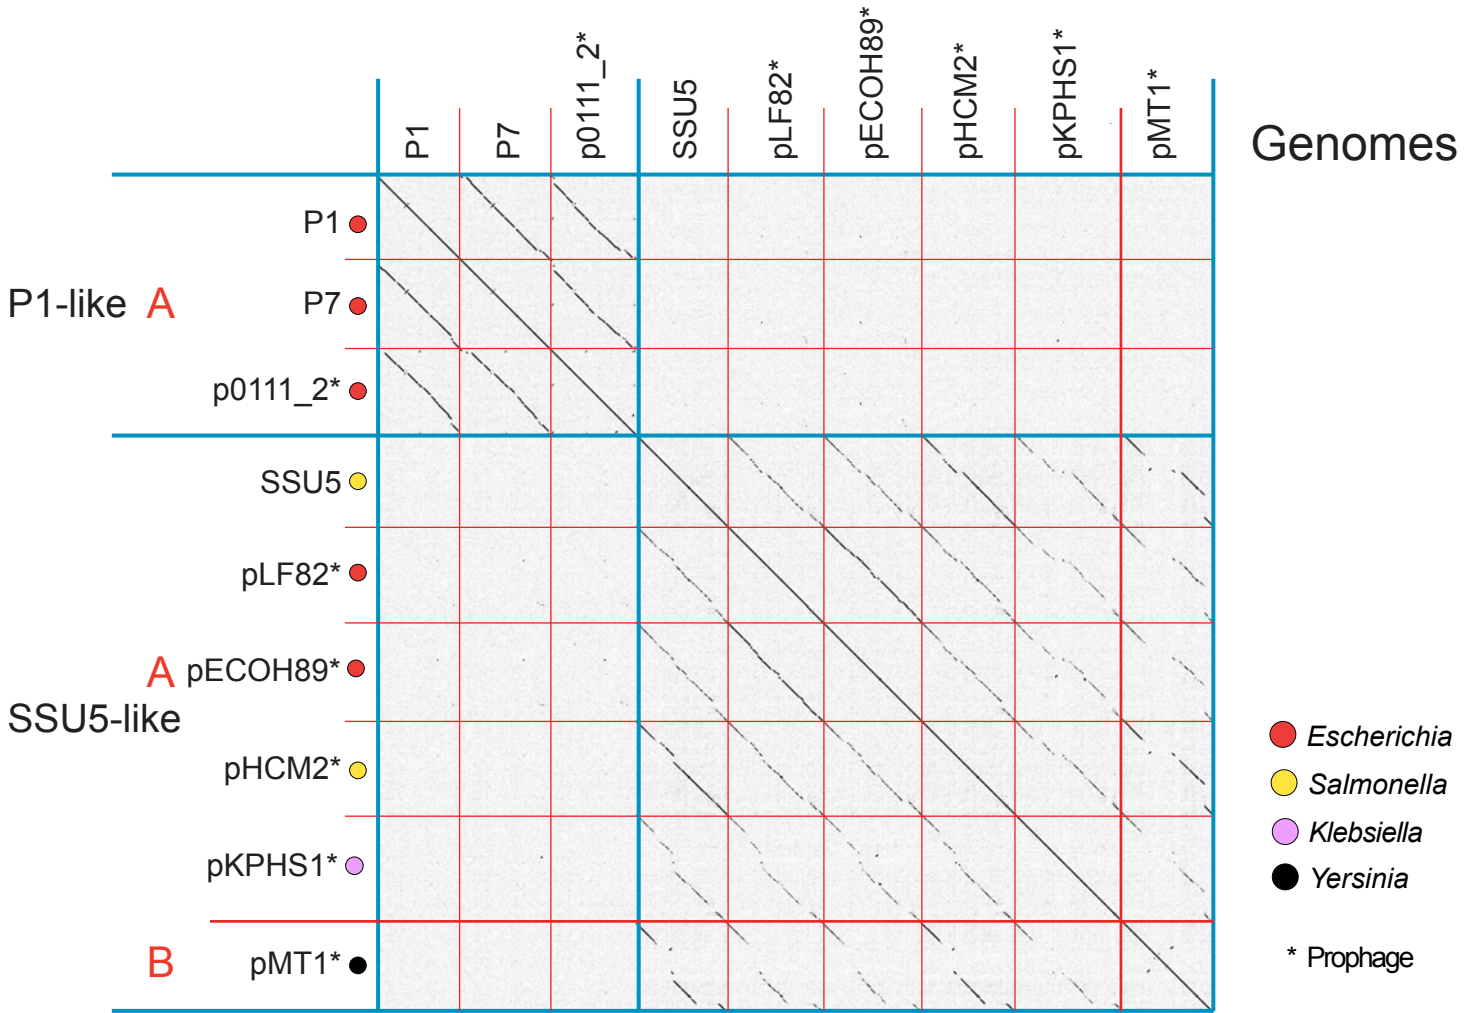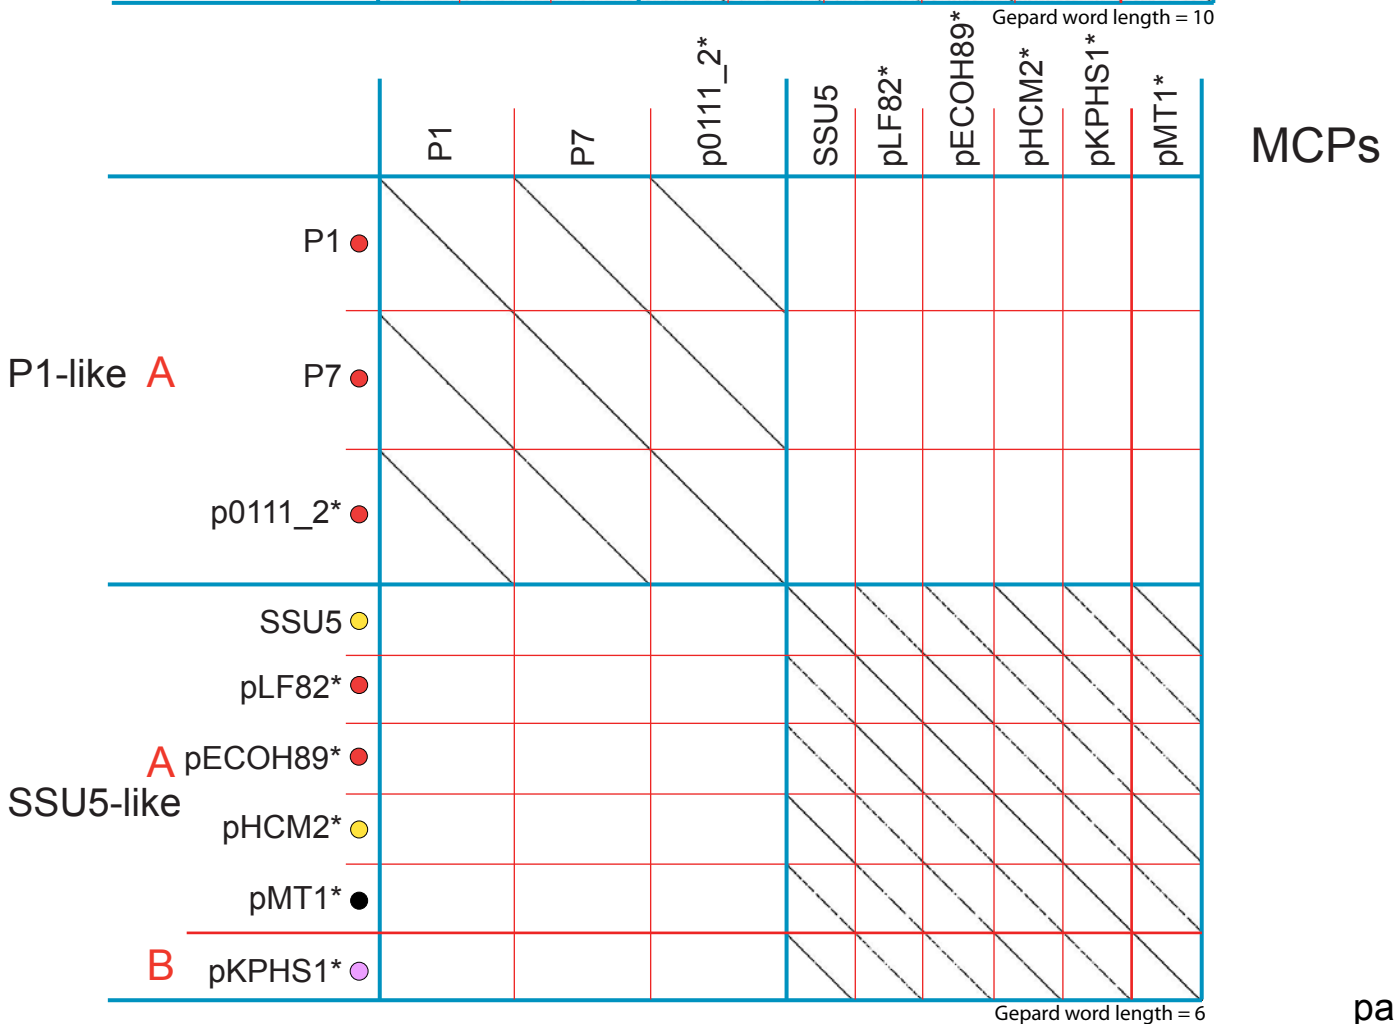

# P2 Supercluster

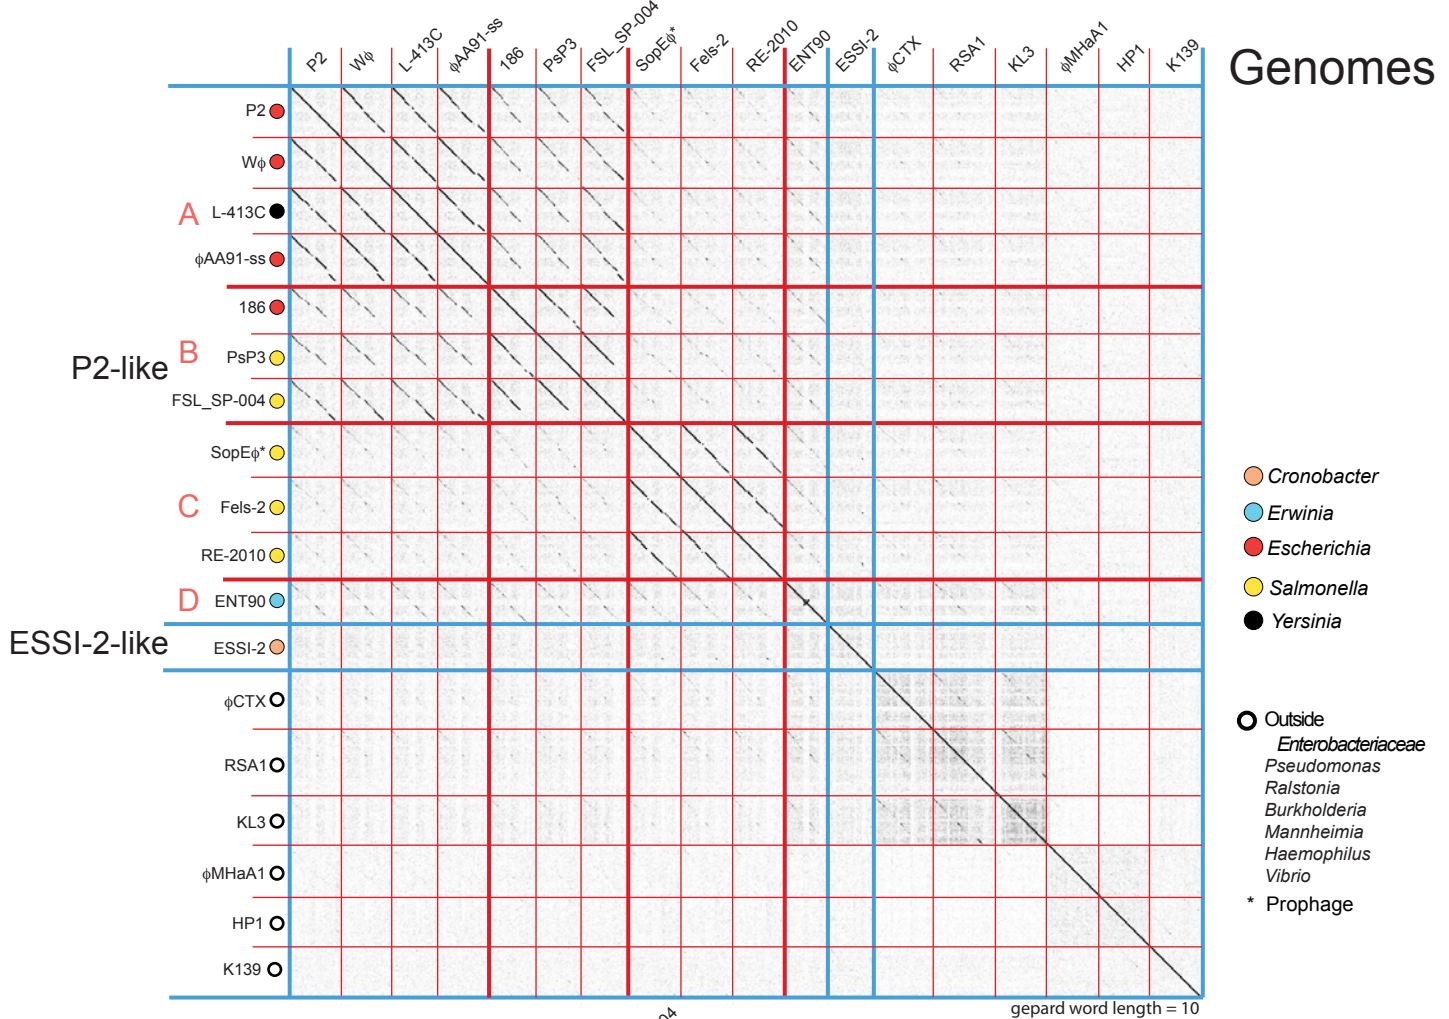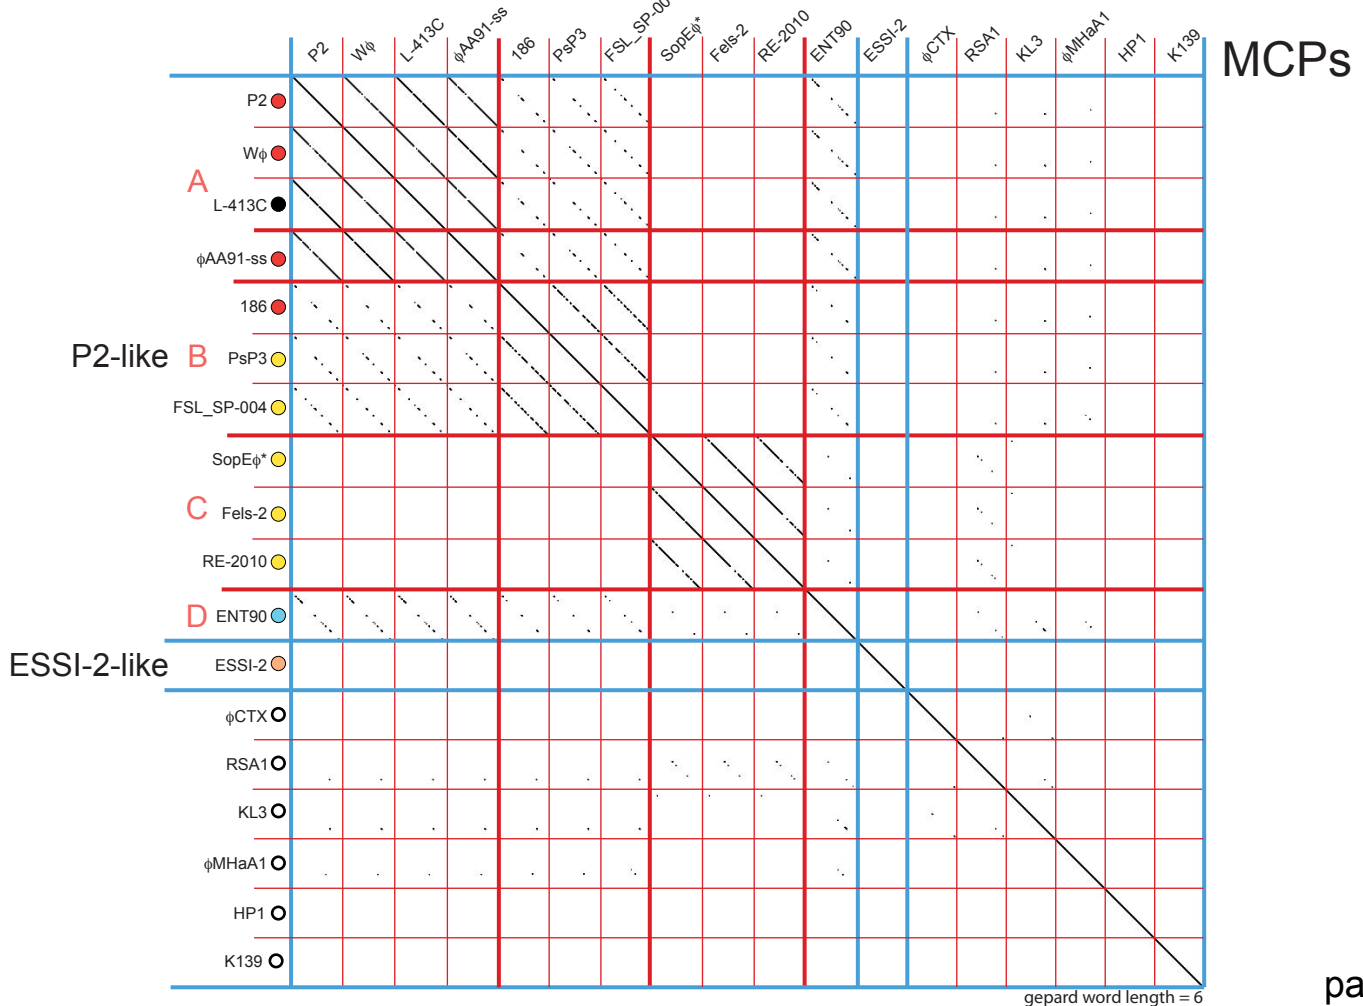

# Mu-like Cluster

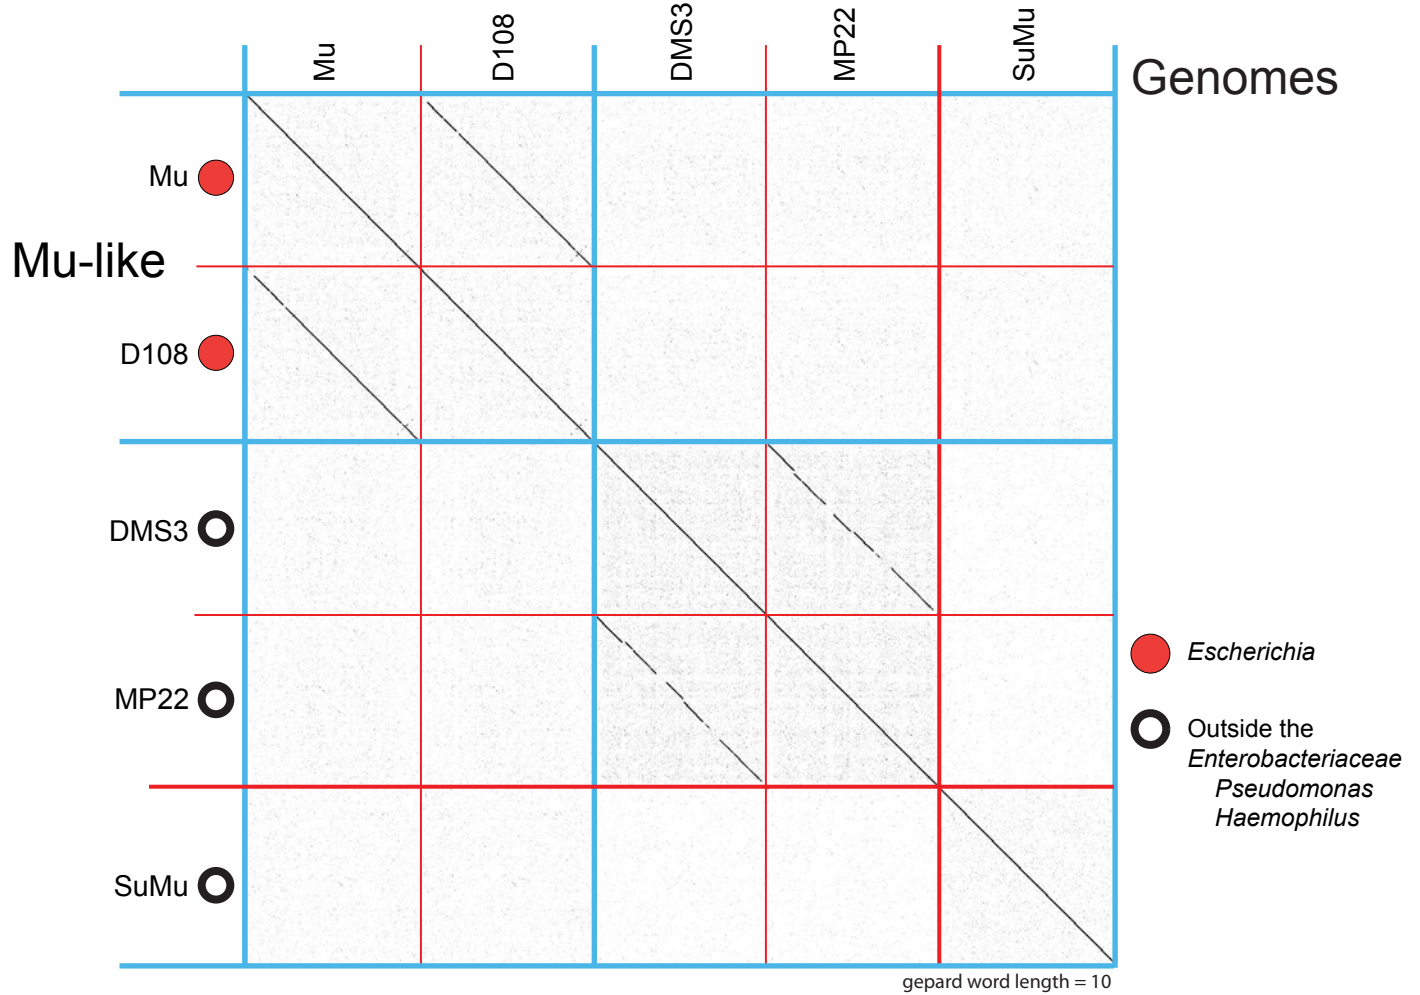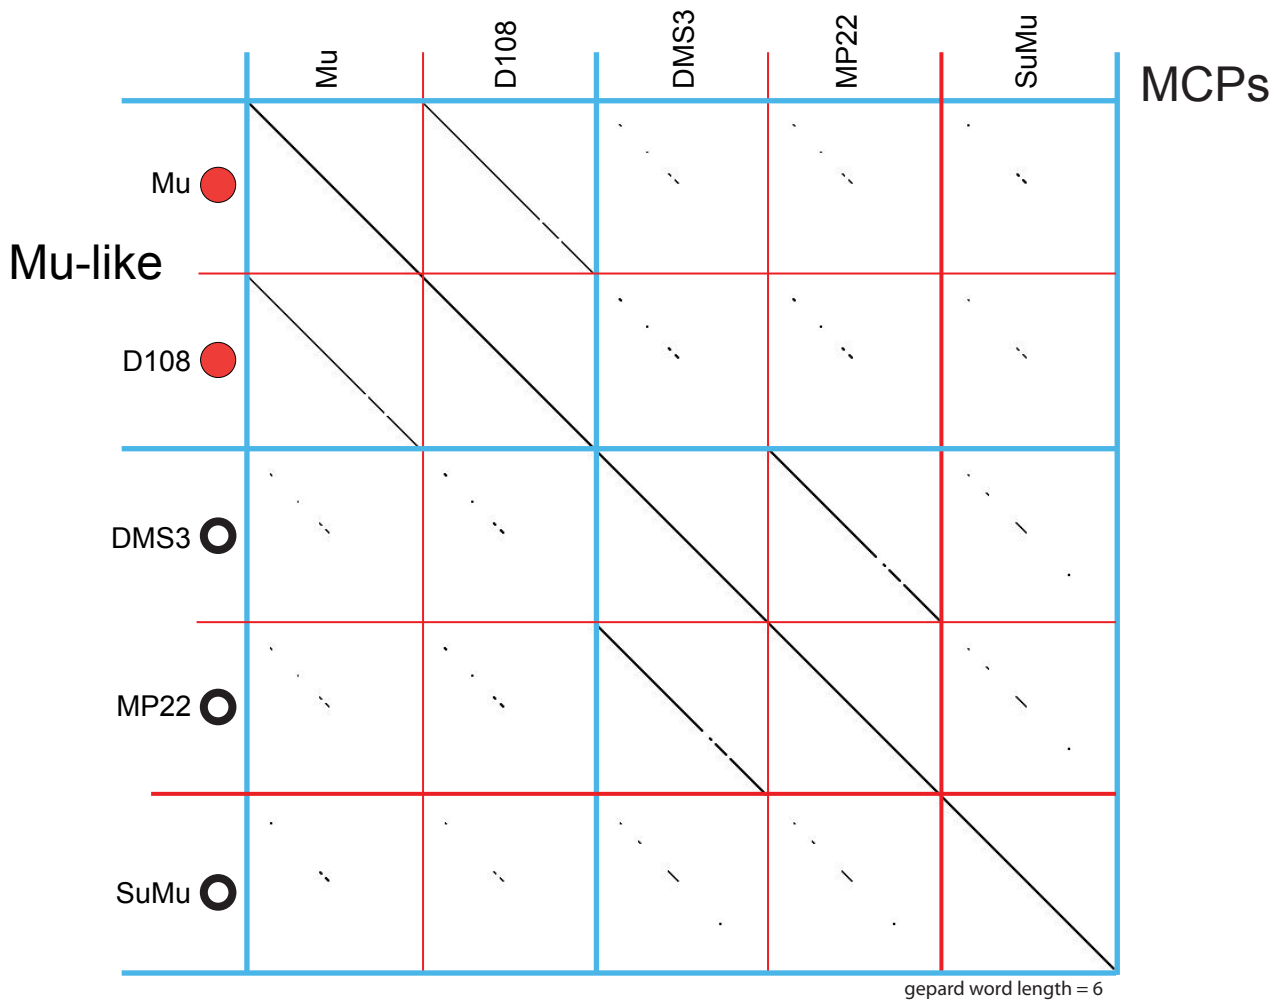

MCPs of Representative Phages With Genomes Larger Than 90 kbp

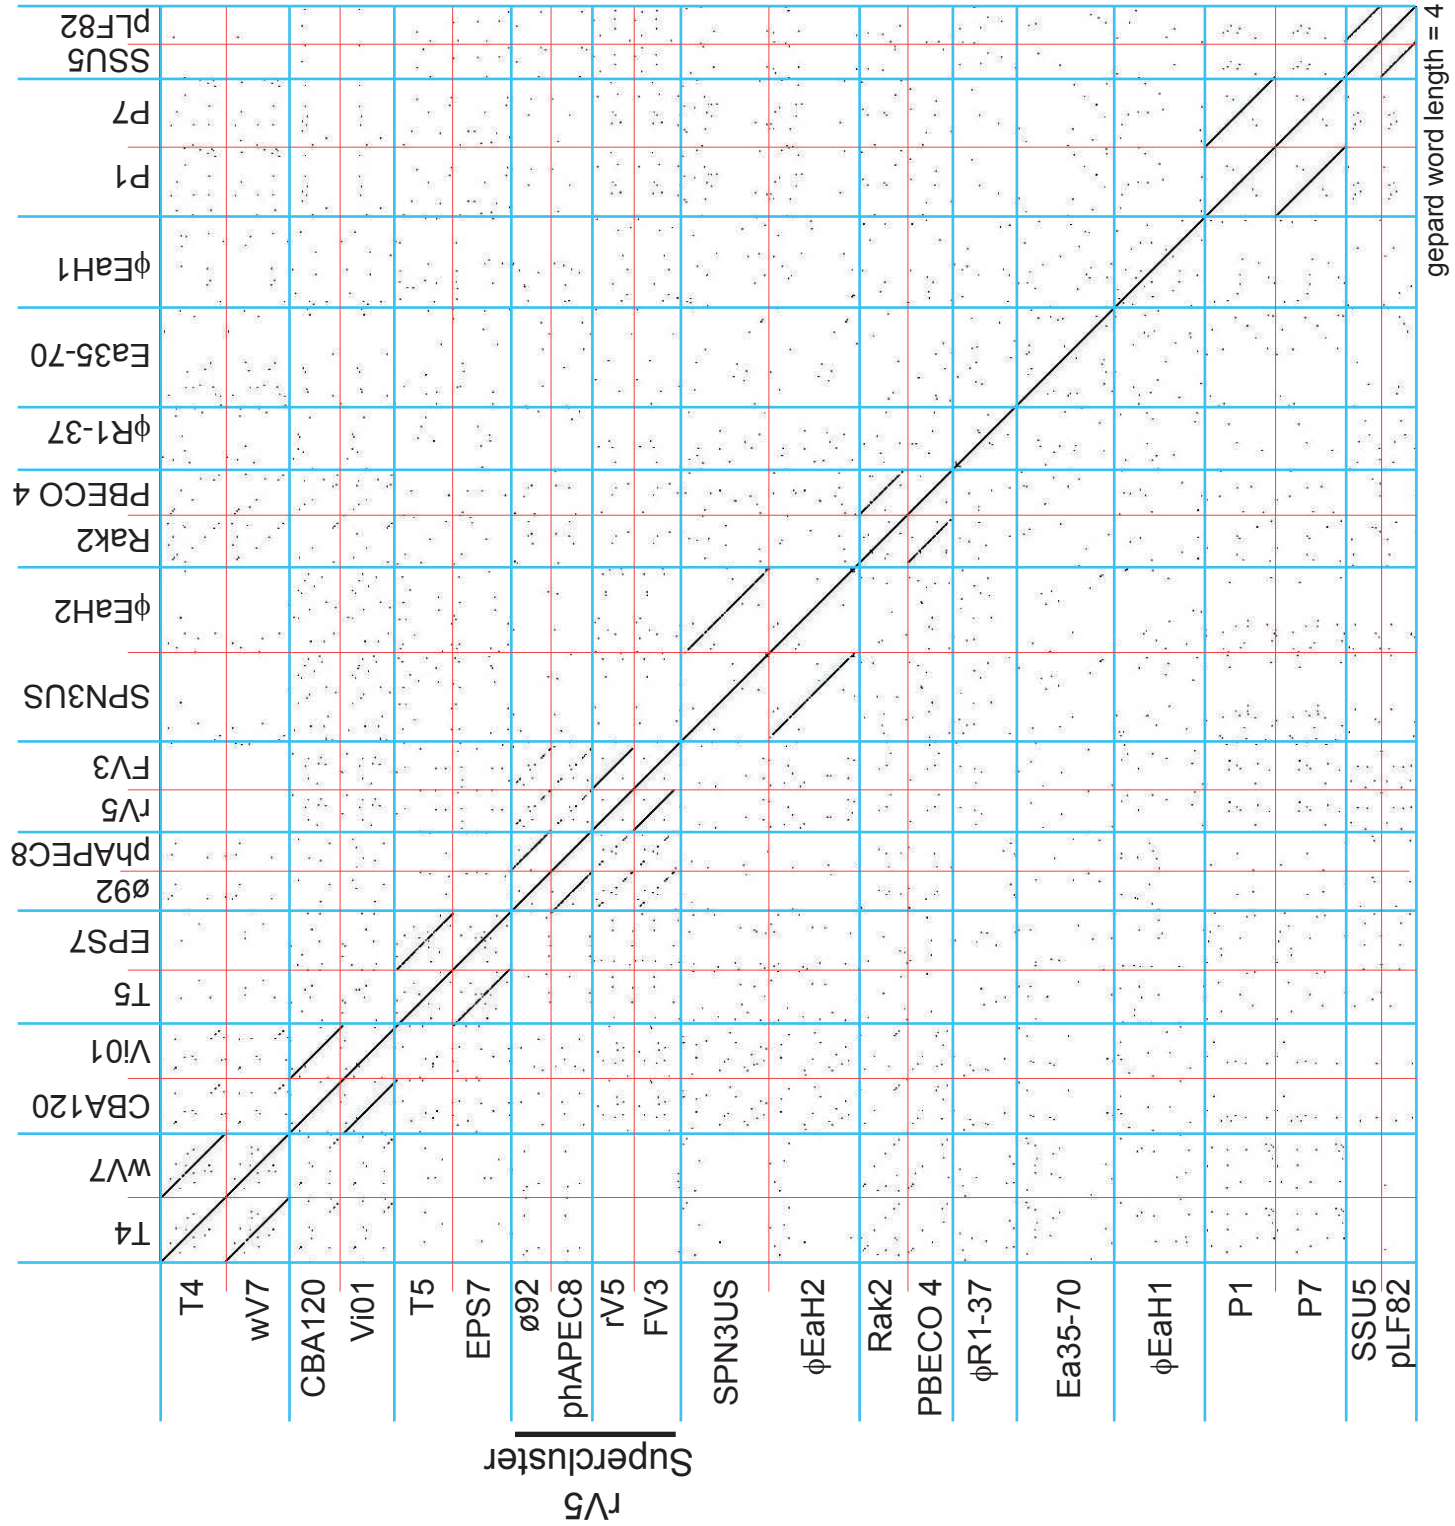

MCPs of Representative Lytic Phages With Genomes Less Than 90 kbp

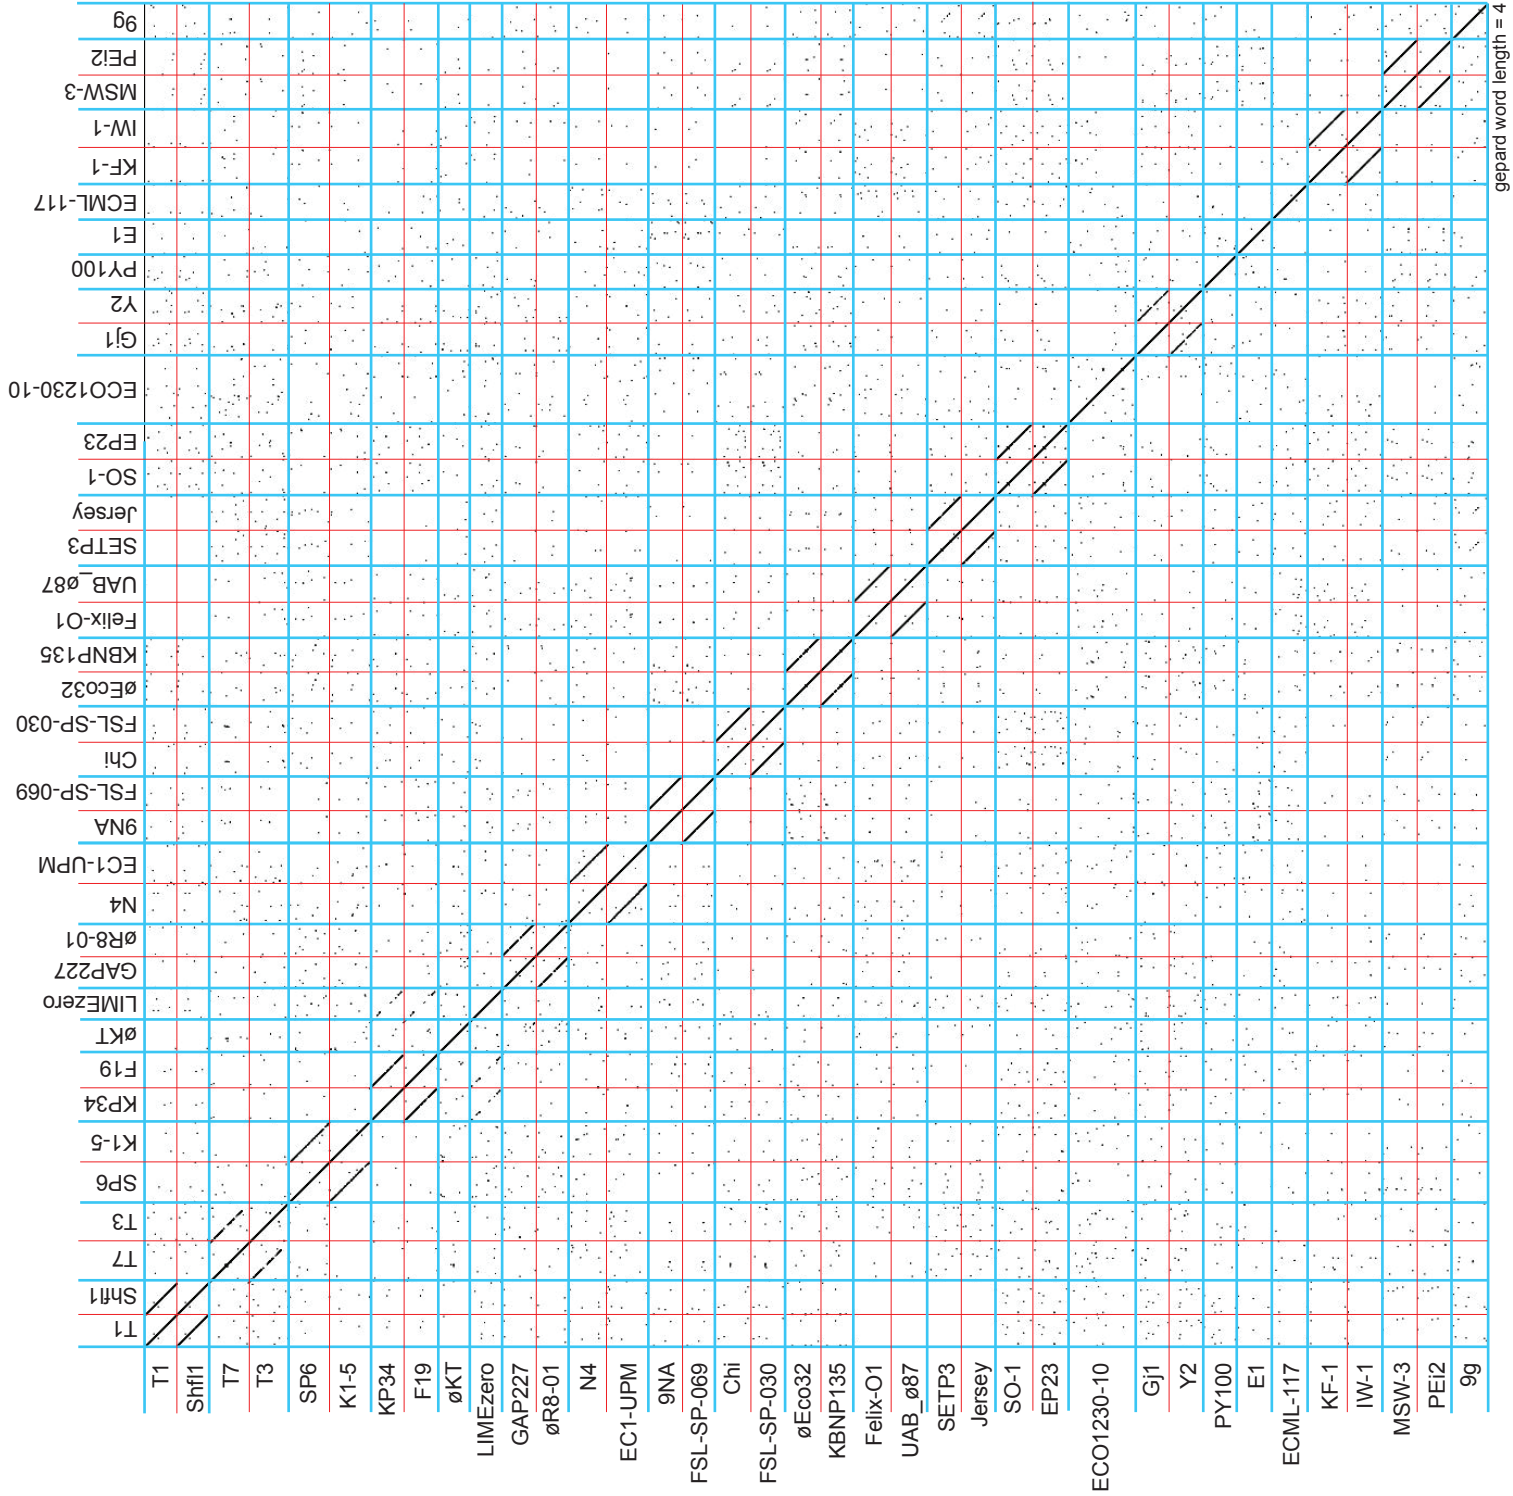

MCPs of Representative Temperate Phages With Genomes Less Than 90 kbp

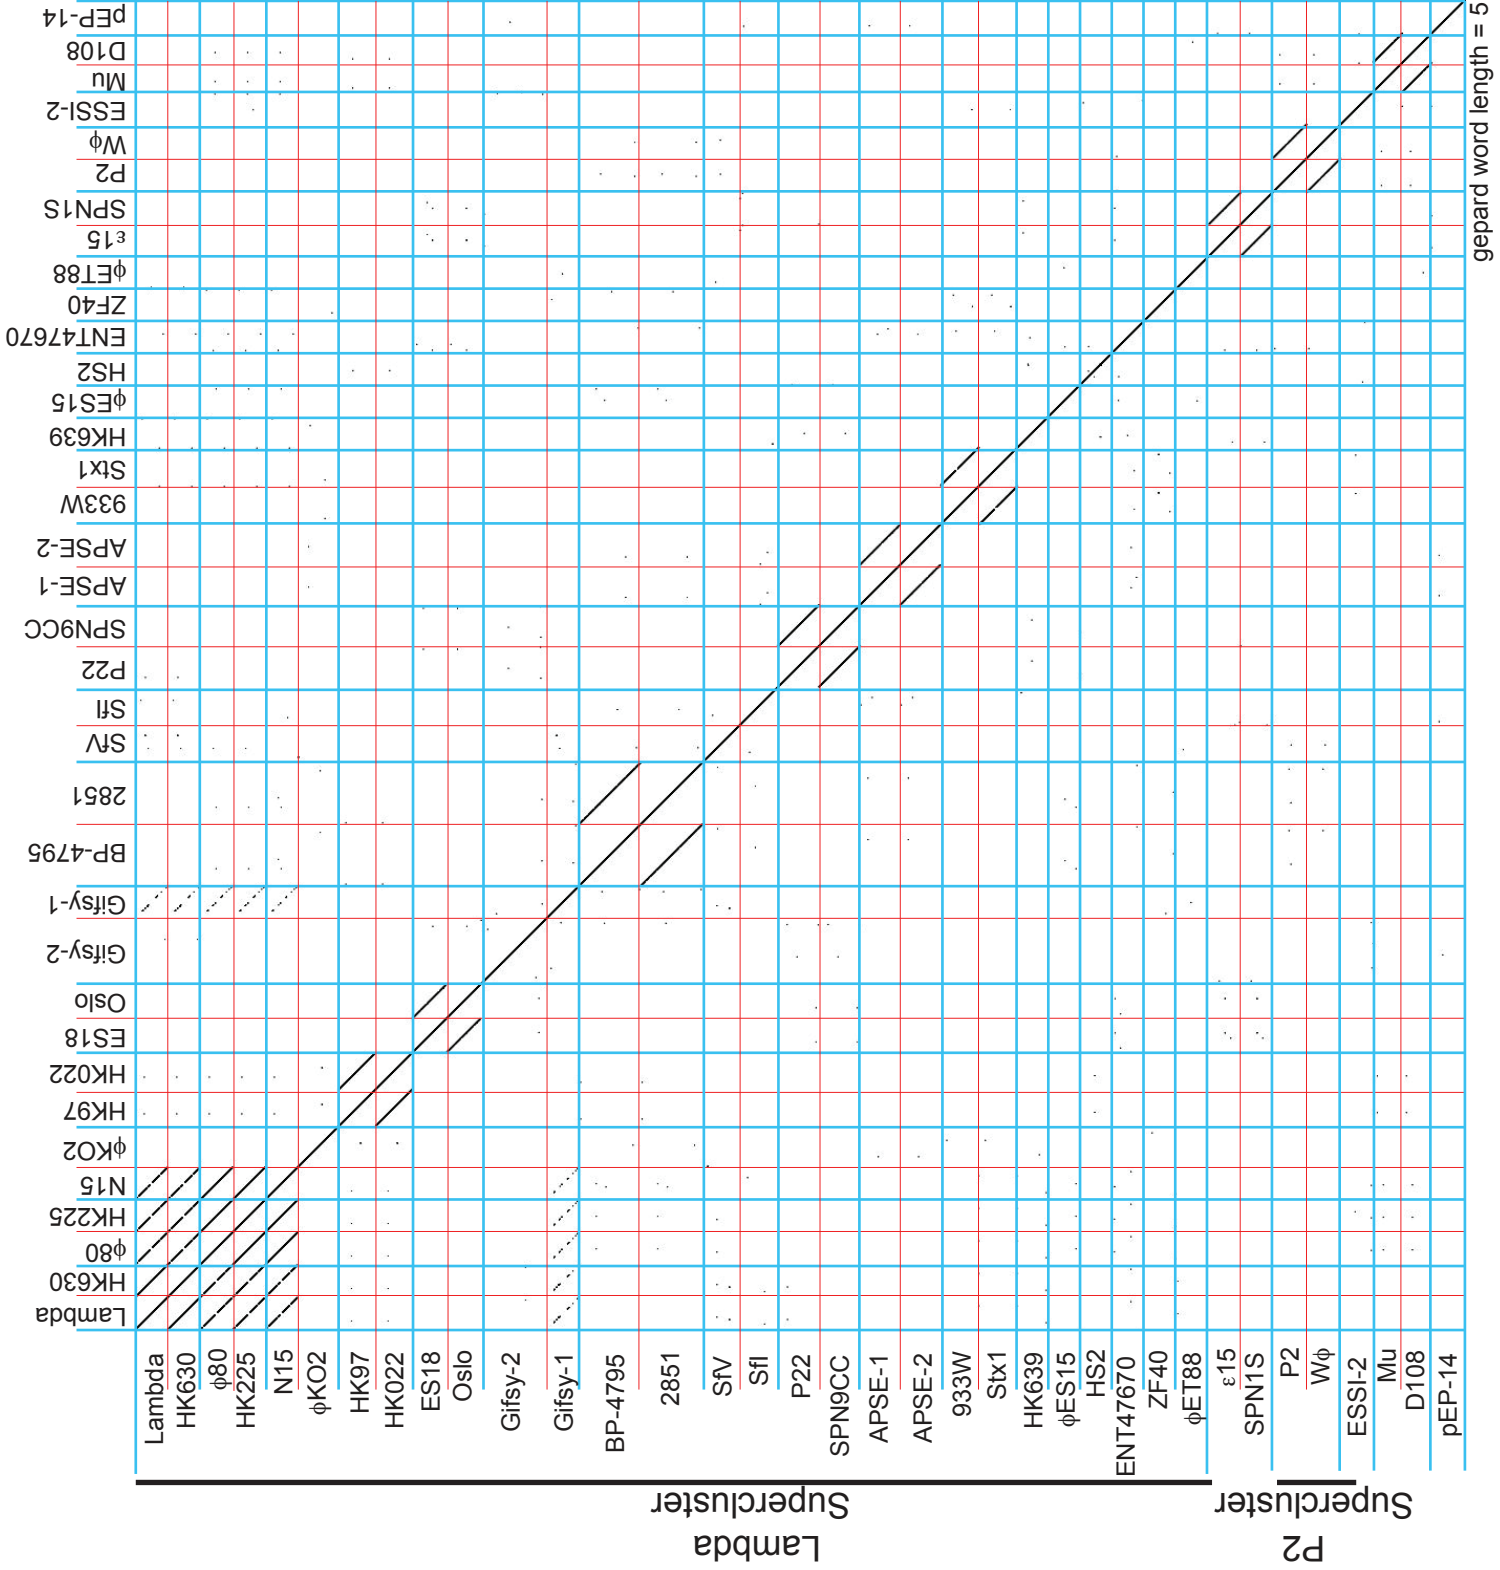



Genomic maps of a representative phage from each of the six T7 supercluster clusters.

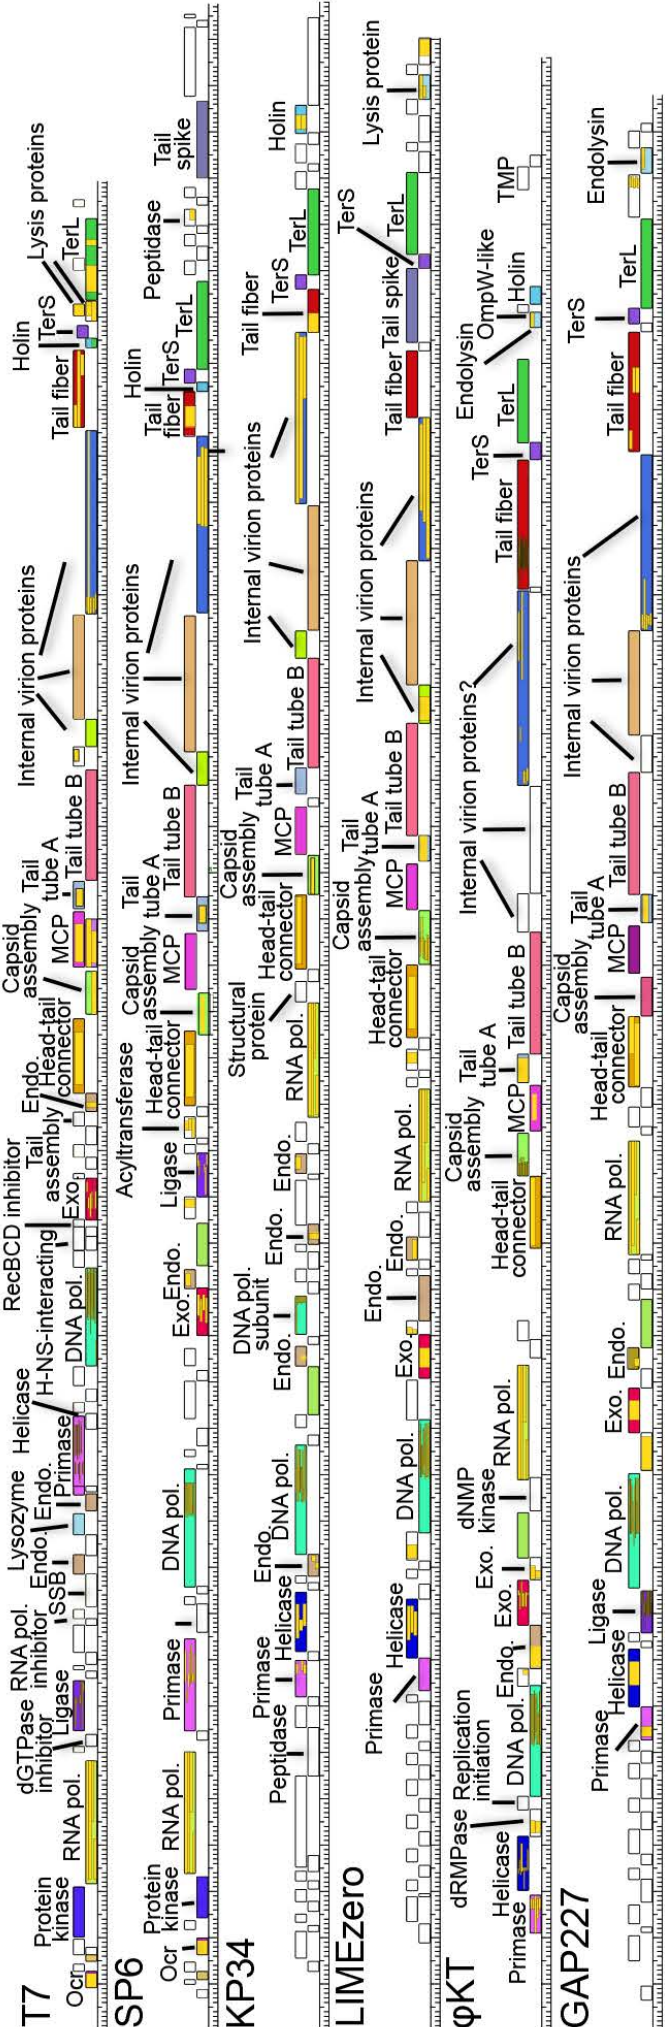

Genes of phages ZF40 and øE188 that are homologous and syntenic with phage lambda cluster genomes

ZF40

Weakly MSW-3-like heads and tails

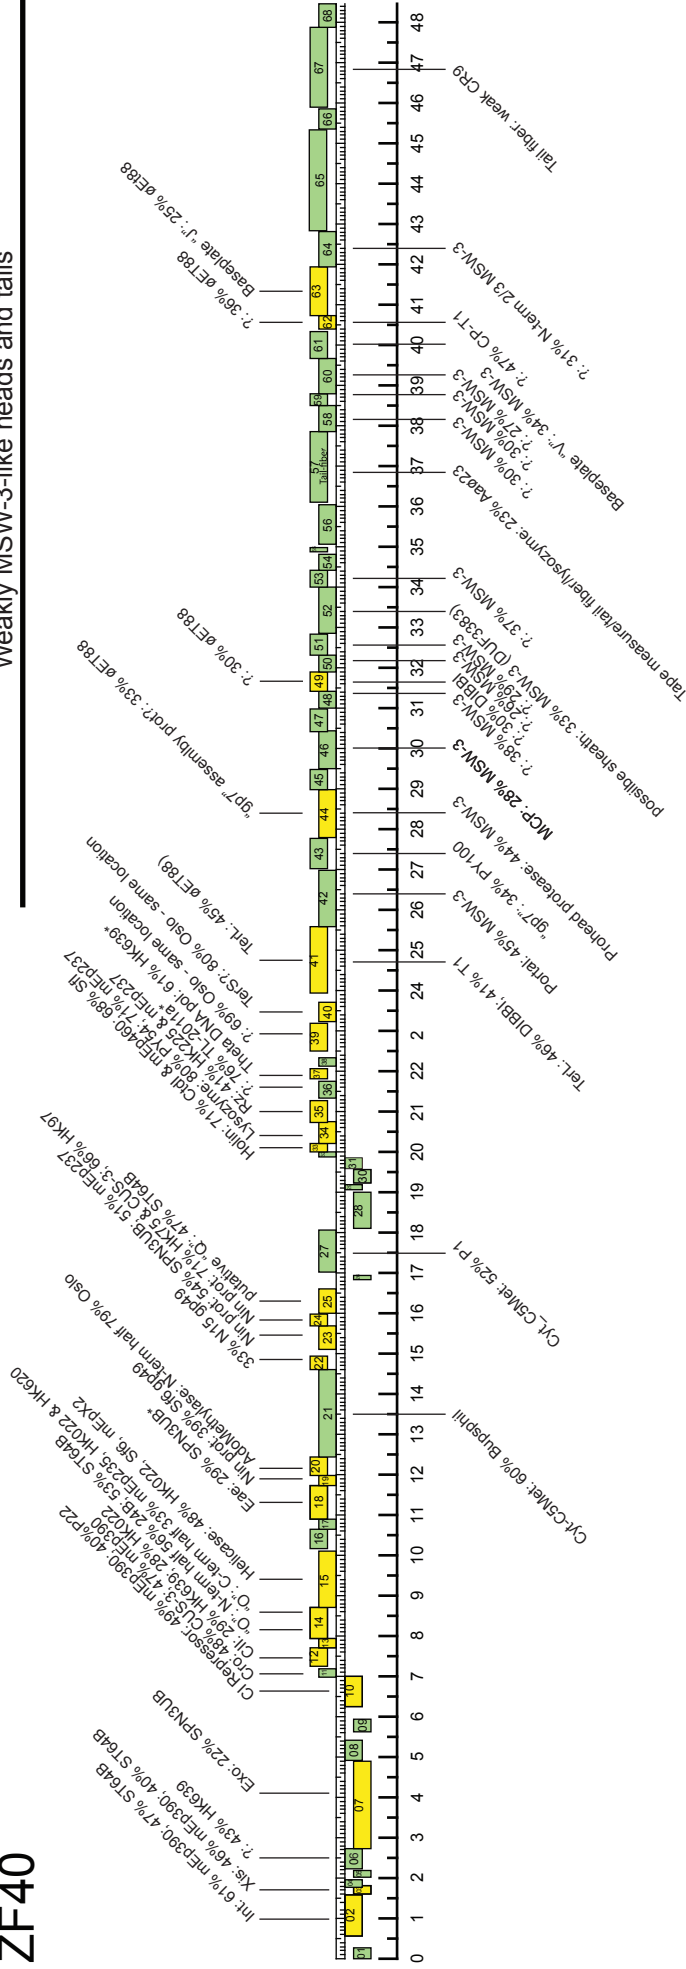

øE188

Xanthomonas phage DIBBI-like heads and tails

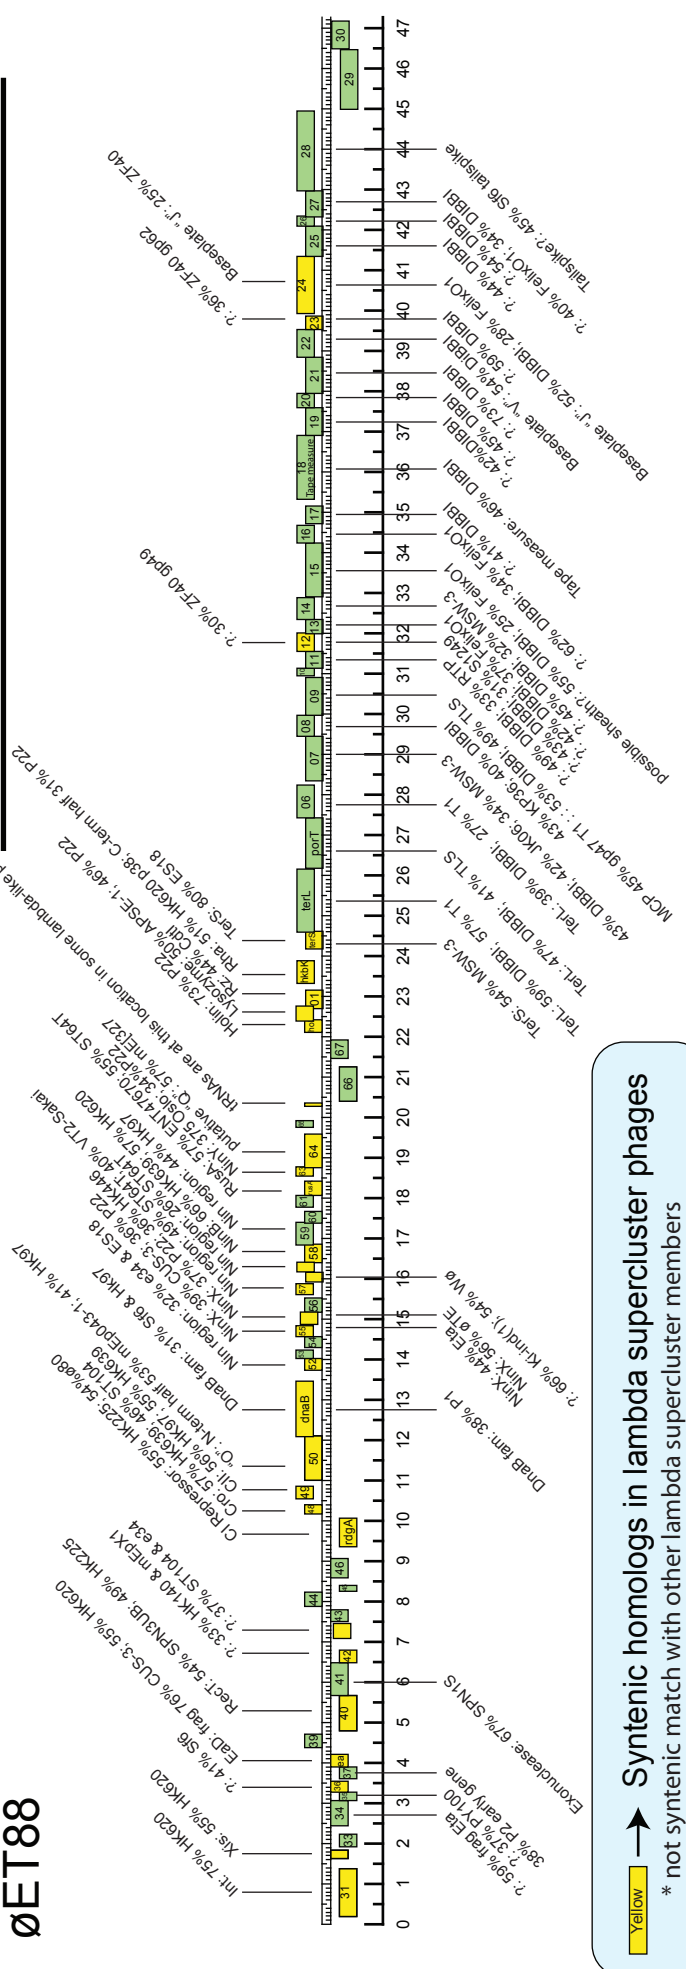

**Syntenic homologs in lambda supercluster phages**  
 \* not syntenic match with other lambda supercluster members

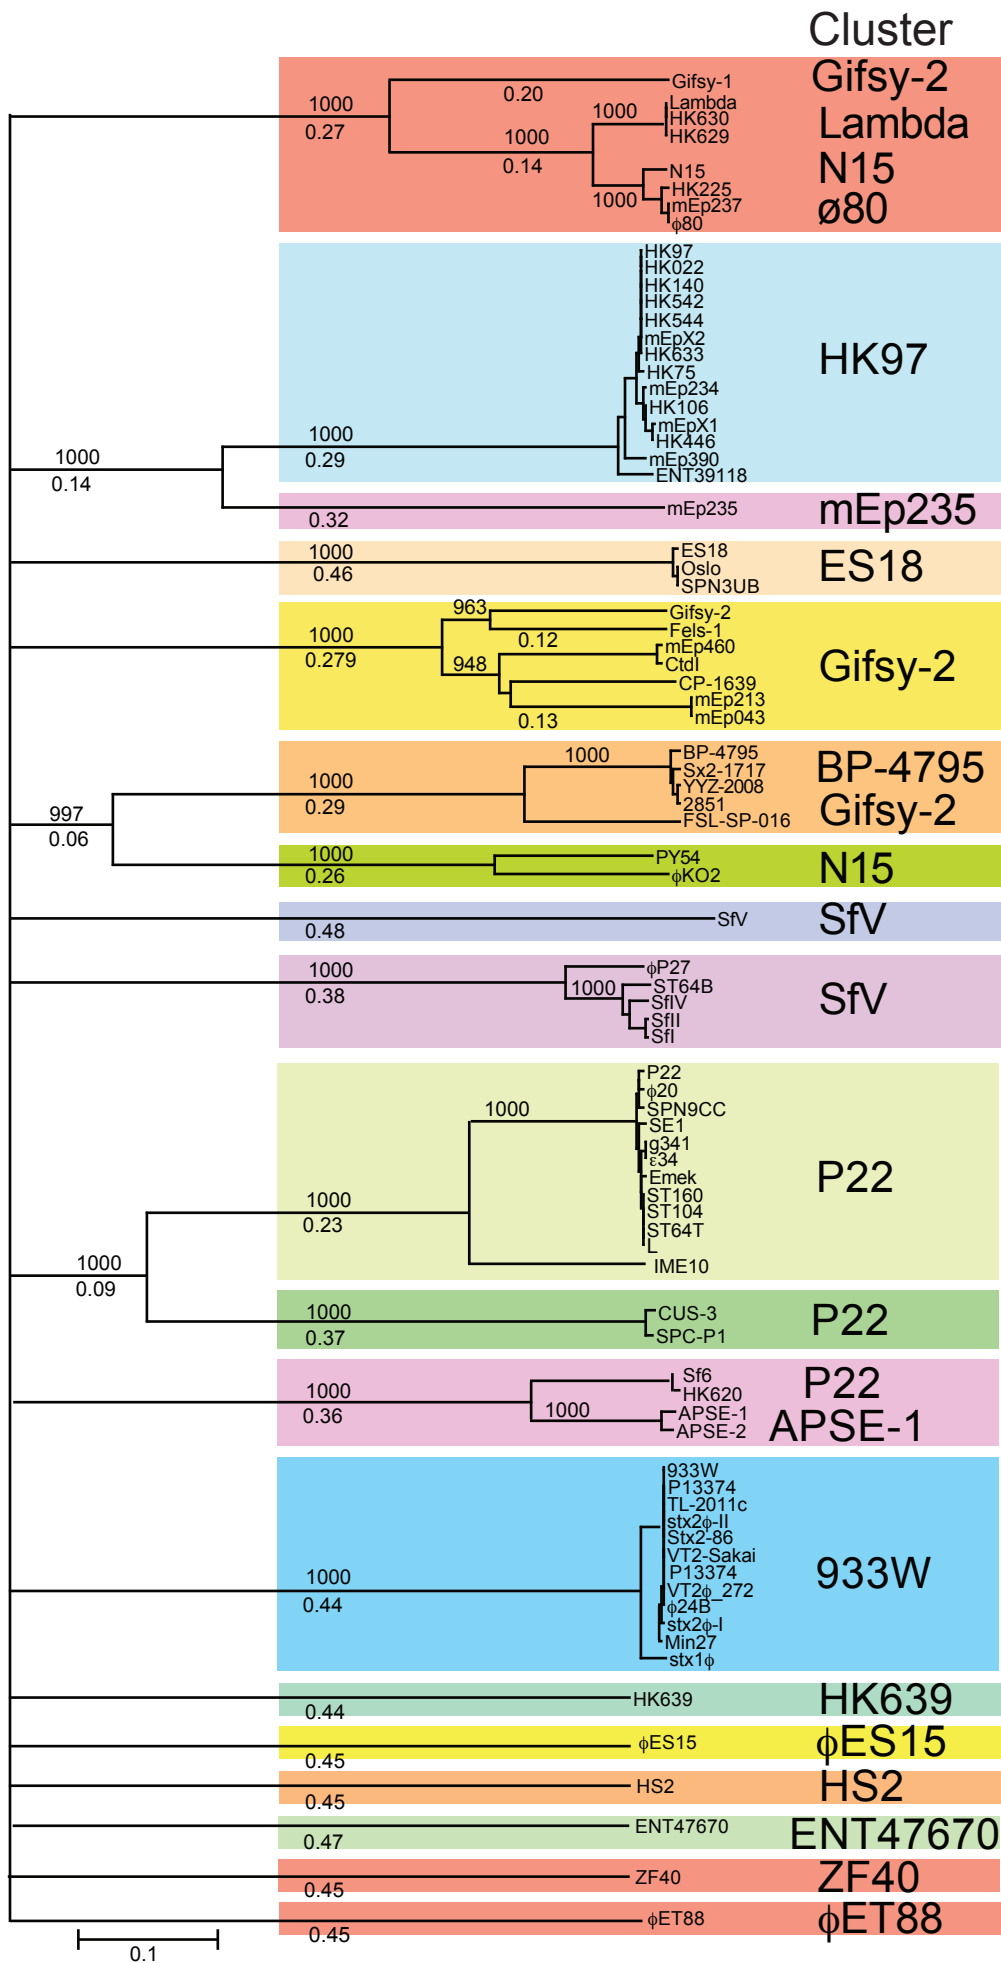

Examples of horizontal exchange within the lambda supercluster

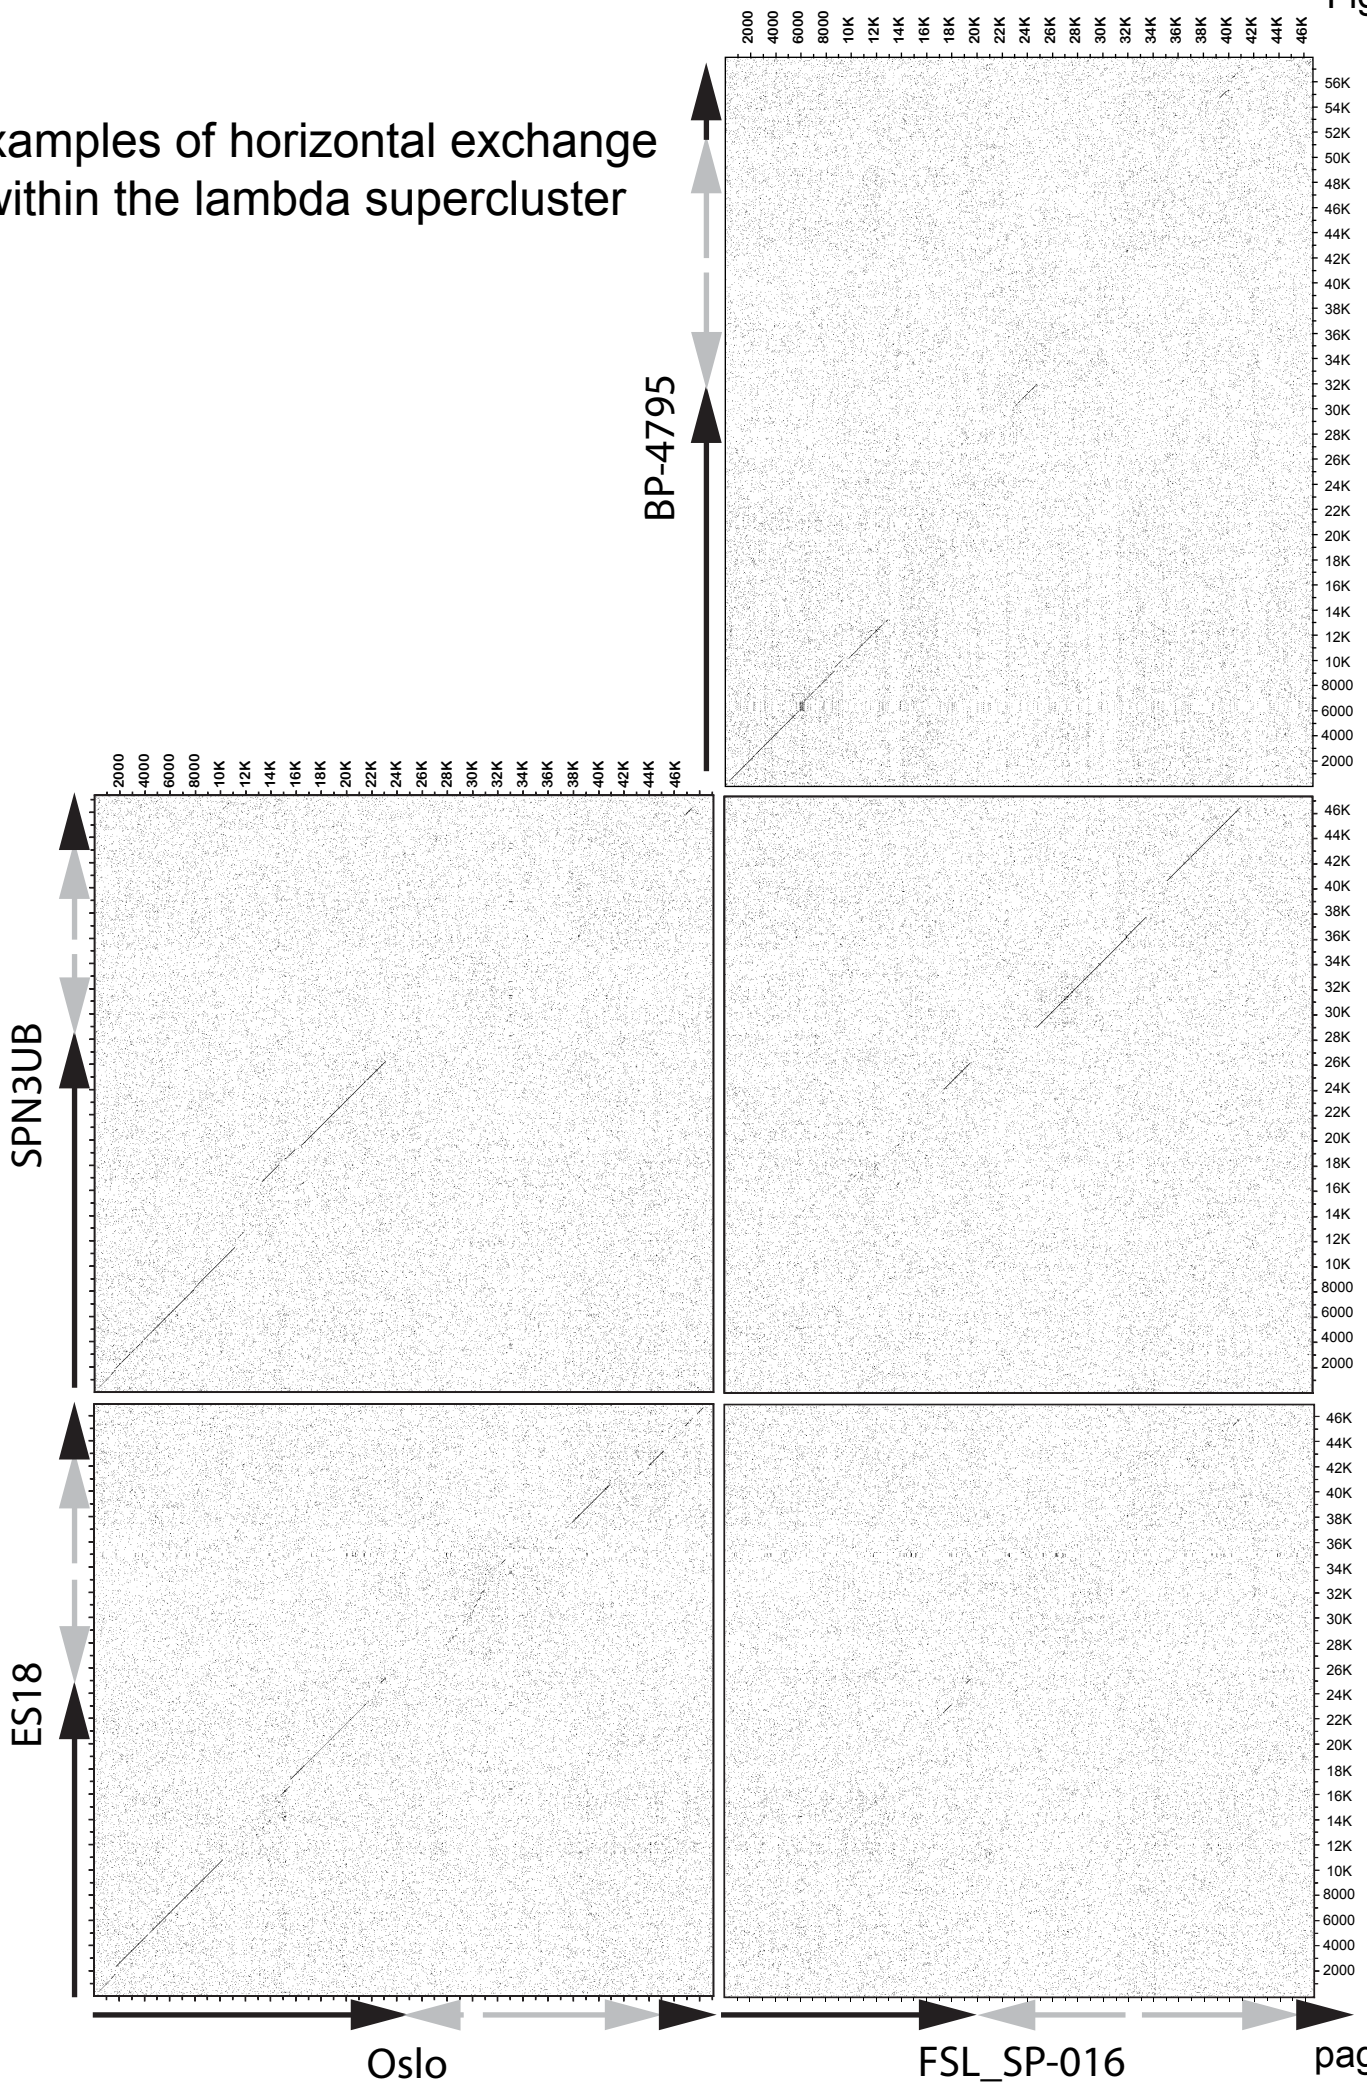

# Examples of mosaicism within the HK97-like cluster

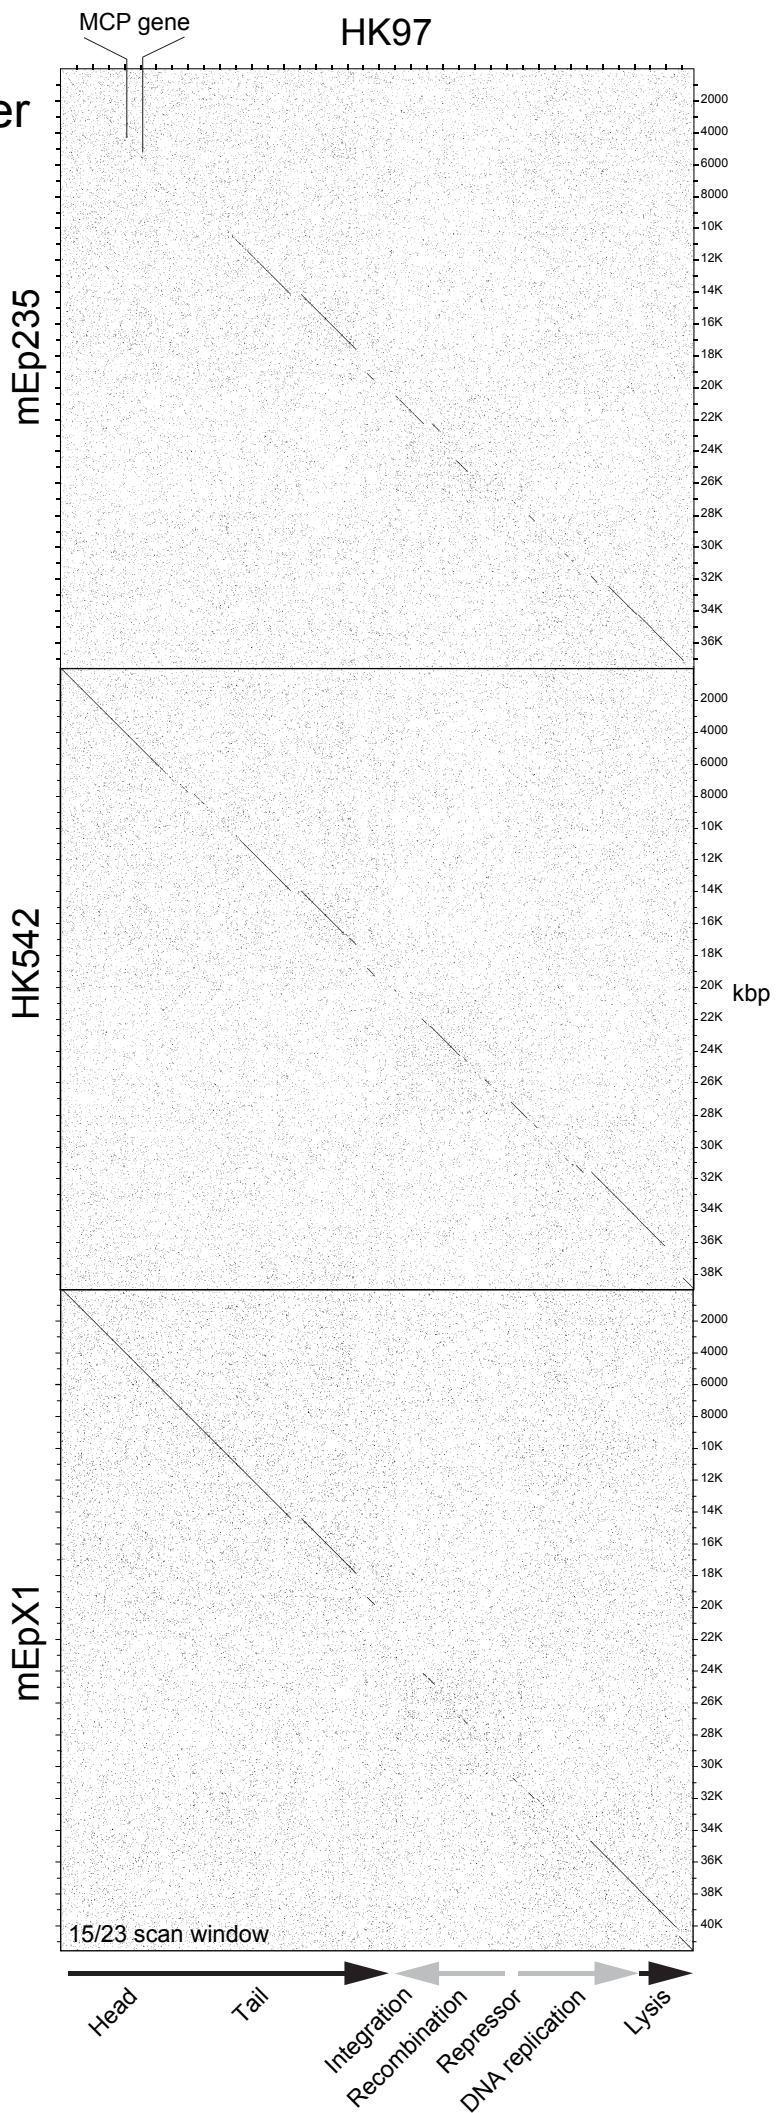

Supplement: NIHMS625084-supplement.pdf [file NIHMS625084-supplement.pdf]
